# Supplementary material for: Sequestering Biomass for Natural, Efficient, and Low-Cost Direct Air Capture of Carbon Dioxide (Version 4)
Source: Preprints.org preprint supplement (doi:10.20944/preprints202106.0212.v4), 2021-11-02
Supplement: Supplementary file 1 [file Average Annual Rainfall By US State and Country.xlsx]

## Sheet: US States
Average Annual Precipitation by USA State - Current Results
State	Inches	Milli­metres	Rank		State	Inches	Milli­metres	Rank	k
Alabama	58.3	1480	4		Nevada	9.5	241	50	0.017712
Alaska	22.5	572	39		Utah	12.2	310	49	0.01992
Arizona	13.6	345	47		Wyoming	12.9	328	48	0.020496
Arkansas	50.6	1284	8		Arizona	13.6	345	47	0.02104
California	22.2	563	40		New Mexico	14.6	370	46	0.02184
Colorado	15.9	405	44		Montana	15.3	390	45	0.02248
Connecticut	50.3	1279	9		Colorado	15.9	405	44	0.02296
Delaware	45.7	1160	16		North Dakota	17.8	452	43	0.024464
Florida	54.5	1385	5		Idaho	18.9	481	42	0.025392
Georgia	50.7	1287	7		South Dakota	20.1	511	41	0.026352
Hawaii	63.7	1618	1		California	22.2	563	40	0.028016
Idaho	18.9	481	42		Alaska	22.5	572	39	0.028304
Illinois	39.2	996	27		Nebraska	23.6	599	38	0.029168
Indiana	41.7	1060	26		Minnesota	27.3	693	37	0.032176
Iowa	34	864	31		Oregon	27.4	695	36	0.03224
Kansas	28.9	733	35		Kansas	28.9	733	35	0.033456
Kentucky	48.9	1242	12		Texas	28.9	734	34	0.033488
Louisiana	60.1	1528	2		Wisconsin	32.6	829	33	0.036528
Maine	42.2	1072	23		Michigan	32.8	833	32	0.036656
Maryland	44.5	1131	18		Iowa	34	864	31	0.037648
Massachusetts	47.7	1211	14		Oklahoma	36.5	927	30	0.039664
Michigan	32.8	833	32		Washington	38.4	976	29	0.041232
Minnesota	27.3	693	37		Ohio	39.1	993	28	0.041776
Mississippi	59	1499	3		Illinois	39.2	996	27	0.041872
Missouri	42.2	1071	24		Indiana	41.7	1060	26	0.04392
Montana	15.3	390	45		New York	41.8	1062	25	0.043984
Nebraska	23.6	599	38		Missouri	42.2	1071	24	0.044272
Nevada	9.5	241	50		Maine	42.2	1072	23	0.044304
New Hampshire	43.4	1103	20		Vermont	42.7	1085	22	0.04472
New Jersey	47.1	1196	15		Pennsylvania	42.9	1089	21	0.044848
New Mexico	14.6	370	46		New Hampshire	43.4	1103	20	0.045296
New York	41.8	1062	25		Virginia	44.3	1125	19	0.046
North Carolina	50.3	1279	9		Maryland	44.5	1131	18	0.046192
North Dakota	17.8	452	43		West Virginia	45.2	1147	17	0.046704
Ohio	39.1	993	28		Delaware	45.7	1160	16	0.04712
Oklahoma	36.5	927	30		New Jersey	47.1	1196	15	0.048272
Oregon	27.4	695	36		Massachusetts	47.7	1211	14	0.048752
Pennsylvania	42.9	1089	21		Rhode Island	47.9	1218	13	0.048976
Rhode Island	47.9	1218	13		Kentucky	48.9	1242	12	0.049744
South Carolina	49.8	1264	11		South Carolina	49.8	1264	11	0.050448
South Dakota	20.1	511	41		Connecticut	50.3	1279	9	0.050928
Tennessee	54.2	1376	6		North Carolina	50.3	1279	9	0.050928
Texas	28.9	734	34		Arkansas	50.6	1284	8	0.051088
Utah	12.2	310	49		Georgia	50.7	1287	7	0.051184
Vermont	42.7	1085	22		Tennessee	54.2	1376	6	0.054032
Virginia	44.3	1125	19		Florida	54.5	1385	5	0.05432
Washington	38.4	976	29		Alabama	58.3	1480	4	0.05736
West Virginia	45.2	1147	17		Mississippi	59	1499	3	0.057968
Wisconsin	32.6	829	33		Louisiana	60.1	1528	2	0.058896
Wyoming	12.9	328	48		Hawaii	63.7	1618	1	0.061776

## Sheet: Country
Average yearly precipitation - by country (mecometer.com)
	Global Rank	Region and Regional Rank	Avg. Precip. (mm)	Year	k for LandGem Model
Egypt	176	Middle East & North Africa | 20	51	2011	0.011632
Libya	175	Middle East & North Africa | 19	56	2011	0.011792
Saudi Arabia	174	Middle East & North Africa | 18	59	2011	0.011888
Qatar	173	Middle East & North Africa | 17	74	2011	0.012368
United Arab Emirates	172	Middle East & North Africa | 16	78	2011	0.012496
Bahrain	171	Middle East & North Africa | 15	83	2011	0.012656
Algeria	170	Middle East & North Africa | 14	89	2011	0.012848
Mauritania	169	Sub-Saharan Africa | 46	92	2011	0.012944
Jordan	168	Middle East & North Africa | 13	111	2011	0.013552
Kuwait	167	Middle East & North Africa | 12	121	2011	0.013872
Oman	166	Middle East & North Africa | 11	125	2011	0.014
Niger	165	Sub-Saharan Africa | 45	151	2011	0.014832
Turkmenistan	164	Europe & Central Asia | 46	161	2011	0.015152
Uzbekistan	163	Europe & Central Asia | 45	206	2011	0.016592
Tunisia	162	Middle East & North Africa | 10	207	2011	0.016624
Iraq	161	Middle East & North Africa | 9	216	2011	0.016912
Djibouti	160	Middle East & North Africa | 8	220	2011	0.01704
Cape Verde	159	Sub-Saharan Africa | 44	228	2011	0.017296
Iran	158	Middle East & North Africa | 7	228	2011	0.017296
Mongolia	157	East Asia & Pacific | 20	241	2011	0.017712
Kazakhstan	156	Europe & Central Asia | 44	250	2011	0.018
Syrian Arab Republic	155	Middle East & North Africa | 6	252	2011	0.018064
Somalia	154	Sub-Saharan Africa | 43	282	2011	0.019024
Mali	153	Sub-Saharan Africa | 42	282	2011	0.019024
Namibia	152	Sub-Saharan Africa | 41	285	2011	0.01912
Chad	151	Sub-Saharan Africa | 40	322	2011	0.020304
Afghanistan	150	South Asia | 8	327	2011	0.020464
Morocco	149	Middle East & North Africa | 5	346	2011	0.021072
Eritrea	148	Sub-Saharan Africa | 39	384	2011	0.022288
West Bank and Gaza	147	Middle East & North Africa | 4	402	2011	0.022864
Sudan	146	Sub-Saharan Africa | 38	416	2011	0.023312
Botswana	145	Sub-Saharan Africa | 37	416	2011	0.023312
Israel	144	Middle East & North Africa | 3	435	2011	0.02392
Azerbaijan	143	Europe & Central Asia | 43	447	2011	0.024304
Moldova	142	Europe & Central Asia | 42	450	2011	0.0244
Russia	141	Europe & Central Asia | 41	460	2011	0.02472
Pakistan	140	South Asia | 7	494	2011	0.025808
South Africa	139	Sub-Saharan Africa | 36	495	2011	0.02584
Cyprus	138	Europe & Central Asia | 40	498	2011	0.025936
Kyrgyz Republic	137	Europe & Central Asia | 39	533	2011	0.027056
Australia	136	East Asia & Pacific | 19	534	2011	0.027088
Finland	135	Europe & Central Asia | 38	536	2011	0.027152
Canada	134	North America | 2	537	2011	0.027184
Malta	133	Middle East & North Africa | 2	560	2011	0.02792
Armenia	132	Europe & Central Asia | 37	562	2011	0.027984
Hungary	131	Europe & Central Asia | 36	589	2011	0.028848
Argentina	130	Latin America & Caribbean | 34	591	2011	0.028912
Turkey	129	Europe & Central Asia | 35	593	2011	0.028976
Poland	128	Europe & Central Asia | 34	600	2011	0.0292
Bulgaria	127	Europe & Central Asia | 33	608	2011	0.029456
Belarus	126	Europe & Central Asia | 32	618	2011	0.029776
Macedonia	125	Europe & Central Asia | 31	619	2011	0.029808
Sweden	124	Europe & Central Asia | 30	624	2011	0.029968
Estonia	123	Europe & Central Asia | 29	626	2011	0.030032
Kenya	122	Sub-Saharan Africa | 35	630	2011	0.03016
Spain	121	Europe & Central Asia | 28	636	2011	0.030352
Romania	120	Europe & Central Asia | 27	637	2011	0.030384
Latvia	119	Europe & Central Asia | 26	641	2011	0.030512
China	118	East Asia & Pacific | 18	645	2011	0.03064
Greece	117	Europe & Central Asia | 25	652	2011	0.030864
Lithuania	116	Europe & Central Asia | 24	656	2011	0.030992
Zimbabwe	115	Sub-Saharan Africa | 34	657	2011	0.031024
Lebanon	114	Middle East & North Africa | 1	661	2011	0.031152
Czech Republic	113	Europe & Central Asia | 23	677	2011	0.031664
Senegal	112	Sub-Saharan Africa | 33	686	2011	0.031952
Tajikistan	111	Europe & Central Asia | 22	691	2011	0.032112
Germany	110	Europe & Central Asia | 21	700	2011	0.0324
Denmark	109	Europe & Central Asia | 20	703	2011	0.032496
United States	108	North America | 1	715	2011	0.03288
Burkina Faso	107	Sub-Saharan Africa | 32	748	2011	0.033936
Mexico	106	Latin America & Caribbean | 33	752	2011	0.034064
Netherlands	105	Europe & Central Asia | 19	778	2011	0.034896
Lesotho	104	Sub-Saharan Africa | 31	788	2011	0.035216
Swaziland	103	Sub-Saharan Africa | 30	788	2011	0.035216
Slovak Republic	102	Europe & Central Asia | 18	824	2011	0.036368
Italy	101	Europe & Central Asia | 17	832	2011	0.036624
The Gambia	100	Sub-Saharan Africa | 29	836	2011	0.036752
Belgium	99	Europe & Central Asia | 16	847	2011	0.037104
Ethiopia	98	Sub-Saharan Africa | 28	848	2011	0.037136
Portugal	97	Europe & Central Asia | 15	854	2011	0.037328
France	96	Europe & Central Asia | 14	867	2011	0.037744
Comoros	95	Sub-Saharan Africa | 27	900	2011	0.0388
Luxembourg	94	Europe & Central Asia | 13	934	2011	0.039888
Angola	93	Sub-Saharan Africa | 26	1010	2011	0.04232
Zambia	92	Sub-Saharan Africa | 25	1020	2011	0.04264
Georgia	91	Europe & Central Asia | 12	1026	2011	0.042832
Bosnia and Herzegovina	90	Europe & Central Asia | 11	1028	2011	0.042896
Antigua and Barbuda	89	Latin America & Caribbean | 32	1030	2011	0.04296
Mozambique	88	Sub-Saharan Africa | 24	1032	2011	0.043024
Benin	87	Sub-Saharan Africa | 23	1039	2011	0.043248
North Korea	86	East Asia & Pacific | 17	1054	2011	0.043728
Tanzania	85	Sub-Saharan Africa | 22	1071	2011	0.044272
India	84	South Asia | 6	1083	2011	0.044656
Austria	83	Europe & Central Asia | 10	1110	2011	0.04552
Croatia	82	Europe & Central Asia | 9	1113	2011	0.045616
Ireland	81	Europe & Central Asia | 8	1118	2011	0.045776
Paraguay	80	Latin America & Caribbean | 31	1130	2011	0.04616
Bolivia	79	Latin America & Caribbean | 30	1146	2011	0.046672
Nigeria	78	Sub-Saharan Africa | 21	1150	2011	0.0468
Slovenia	77	Europe & Central Asia | 7	1162	2011	0.047184
Togo	76	Sub-Saharan Africa | 20	1168	2011	0.047376
Uganda	75	Sub-Saharan Africa | 19	1180	2011	0.04776
Malawi	74	Sub-Saharan Africa | 18	1181	2011	0.047792
Ghana	73	Sub-Saharan Africa | 17	1187	2011	0.047984
Rwanda	72	Sub-Saharan Africa | 16	1212	2011	0.048784
United Kingdom	71	Europe & Central Asia | 6	1220	2011	0.04904
Uruguay	70	Latin America & Caribbean | 29	1265	2011	0.05048
Korea	69	East Asia & Pacific | 16	1274	2011	0.050768
Burundi	68	Sub-Saharan Africa | 15	1274	2011	0.050768
The Bahamas	67	Latin America & Caribbean | 28	1292	2011	0.051344
Cuba	66	Latin America & Caribbean | 27	1335	2011	0.05272
Central African Republic	65	Sub-Saharan Africa | 14	1343	2011	0.052976
Côte d'Ivoire	64	Sub-Saharan Africa | 13	1348	2011	0.053136
Dominican Republic	63	Latin America & Caribbean | 26	1410	2011	0.05512
Norway	62	Europe & Central Asia | 5	1414	2011	0.055248
Barbados	61	Latin America & Caribbean | 25	1422	2011	0.055504
St. Kitts and Nevis	60	Latin America & Caribbean | 24	1427	2011	0.055664
Haiti	59	Latin America & Caribbean | 23	1440	2011	0.05608
Albania	58	Europe & Central Asia | 4	1485	2011	0.05752
Nepal	57	South Asia | 5	1500	2011	0.058
Madagascar	56	Sub-Saharan Africa | 12	1513	2011	0.058416
Chile	55	Latin America & Caribbean | 22	1522	2011	0.058704
Switzerland	54	Europe & Central Asia | 3	1537	2011	0.059184
Guinea-Bissau	53	Sub-Saharan Africa | 11	1577	2011	0.060464
St. Vincent and the Grenadines	52	Latin America & Caribbean | 21	1583	2011	0.060656
Cameroon	51	Sub-Saharan Africa | 10	1604	2011	0.061328
Thailand	50	East Asia & Pacific | 15	1622	2011	0.061904
Congo	49	Sub-Saharan Africa | 9	1646	2011	0.062672
Guinea	48	Sub-Saharan Africa | 8	1651	2011	0.062832
Japan	47	East Asia & Pacific | 14	1668	2011	0.063376
Belize	46	Latin America & Caribbean | 20	1705	2011	0.06456
Sri Lanka	45	South Asia | 4	1712	2011	0.064784
El Salvador	44	Latin America & Caribbean | 19	1724	2011	0.065168
New Zealand	43	East Asia & Pacific | 13	1732	2011	0.065424
Peru	42	Latin America & Caribbean | 18	1738	2011	0.065616
Brazil	41	Latin America & Caribbean | 17	1782	2011	0.067024
Vietnam	40	East Asia & Pacific | 12	1821	2011	0.068272
Gabon	39	Sub-Saharan Africa | 7	1831	2011	0.068592
Lao PDR	38	East Asia & Pacific | 11	1834	2011	0.068688
Ukraine	37	Europe & Central Asia | 2	1875	2011	0.07
Venezuela	36	Latin America & Caribbean | 16	1875	2011	0.07
Cambodia	35	East Asia & Pacific | 10	1904	2011	0.070928
Iceland	34	Europe & Central Asia | 1	1940	2011	0.07208
Maldives	33	South Asia | 3	1972	2011	0.073104
Honduras	32	Latin America & Caribbean | 15	1976	2011	0.073232
Guatemala	31	Latin America & Caribbean | 14	1996	2011	0.073872
Mauritius	30	Sub-Saharan Africa | 6	2041	2011	0.075312
Jamaica	29	Latin America & Caribbean | 13	2051	2011	0.075632
Puerto Rico	28	Latin America & Caribbean | 12	2054	2011	0.075728
Dominica	27	Latin America & Caribbean | 11	2083	2011	0.076656
Ecuador	26	Latin America & Caribbean | 10	2087	2011	0.076784
Myanmar	25	East Asia & Pacific | 9	2091	2011	0.076912
Equatorial Guinea	24	Sub-Saharan Africa | 5	2156	2011	0.078992
Bhutan	23	South Asia | 2	2200	2011	0.0804
Trinidad and Tobago	22	Latin America & Caribbean | 9	2200	2011	0.0804
St. Lucia	21	Latin America & Caribbean | 8	2301	2011	0.083632
Seychelles	20	Sub-Saharan Africa | 4	2330	2011	0.08456
Suriname	19	Latin America & Caribbean | 7	2331	2011	0.084592
Philippines	18	East Asia & Pacific | 8	2348	2011	0.085136
Grenada	17	Latin America & Caribbean | 6	2350	2011	0.0852
Guyana	16	Latin America & Caribbean | 5	2387	2011	0.086384
Liberia	15	Sub-Saharan Africa | 3	2391	2011	0.086512
Nicaragua	14	Latin America & Caribbean | 4	2391	2011	0.086512
Singapore	13	East Asia & Pacific | 7	2497	2011	0.089904
Sierra Leone	12	Sub-Saharan Africa | 2	2526	2011	0.090832
Fiji	11	East Asia & Pacific | 6	2592	2011	0.092944
Colombia	10	Latin America & Caribbean | 3	2612	2011	0.093584
Bangladesh	9	South Asia | 1	2666	2011	0.095312
Panama	8	Latin America & Caribbean | 2	2692	2011	0.096144
Indonesia	7	East Asia & Pacific | 5	2702	2011	0.096464
Brunei	6	East Asia & Pacific | 4	2722	2011	0.097104
Malaysia	5	East Asia & Pacific | 3	2875	2011	0.102
Costa Rica	4	Latin America & Caribbean | 1	2926	2011	0.103632
Solomon Islands	3	East Asia & Pacific | 2	3028	2011	0.106896
Papua New Guinea	2	East Asia & Pacific | 1	3142	2011	0.110544
São Tomé and Principe	1	Sub-Saharan Africa | 1	3200	2011	0.1124
