# Supplementary material for: Sequestering Biomass for Natural, Efficient, and Low-Cost Direct Air Capture of Carbon Dioxide (Version 4)
Source: Preprints.org preprint supplement (doi:10.20944/preprints202106.0212.v4), 2021-11-02
Supplement: Supplementary file 5 [file EIA aeo21_ccs_saline_costs for CO2 Storage.xlsx]

## Sheet: Sheet1
AEO2021 Carbon storage costs in EMM
	2020 $/ton	$/tonne
EMM fuel region				States in region
1	26.8438	29.5899		CT,MA,ME,NH,RI,VT
2	20.8844	23.0209		NY,NJ
3	48.7566	53.7444		PA
4	19.9623	22.0044		OH
5	34.074	37.5598		IL,IN,MI
6	22.256	24.5328		WI
7	36.1762	39.877		MN,ND,SD
8	40.3908	44.5228		IA,NE
9	17.0075	18.7474		KS,MO
10	19.592	21.5963		DE,MD
11	41.92	46.2084		DC,WV
12	33.1395	36.5296		VA
13	20.7494	22.8721		NC,SC
14	23.9993	26.4544		GA
15	15.6561	17.2577		FL
16	17.104	18.8538		KY,TN
17	24.2359	26.7153		AL,MS
18	19.1093	21.0642		AR,LA,OK,TX
19	21.0398	23.1922		MT,ID,WY
20	27.4467	30.2545		CO,NV,UT
21	18.5203	20.415		AZ,NM
22	11.9991	13.2267		OR,WA
23	25.0798	27.6454		CA
