# Supplementary material for: Sequestering Biomass for Natural, Efficient, and Low-Cost Direct Air Capture of Carbon Dioxide (Version 4)
Source: Preprints.org preprint supplement (doi:10.20944/preprints202106.0212.v4), 2021-11-02
Supplement: Supplementary file 6 [file LandGem Bahrain Params and Switchgrass with Varying k.xlsx]

## Sheet: Waste Acceptance and In Place
														Total Percent Decomposible Waste	Total Degradable Waste (Mg)
													Food	35.2
													Paper & Cardboard	11.6
													Textiles	4.1
													Subtotal 1	50.9	1.17948e+07	tonnes
Year	Waste Acceptance Rate (Mg)	Waste in Place (Mg)
1987	187124	0
1988	200589	187124											Other Organics	2.8
1989	215024	387713											Misc Combustibles	1.8
1990	230498	602737											Subtotal 2	55.5	1.28607e+07	tonnes
1991	247084	833235
1992	264865	1080319											Total Waste in Place		23172413	tonnes
1993	283925	1345184
1994	304357	1629109
1995	326259	1933466
1996	349737	2259725
1997	363691	2609462
1998	377764	2973153
1999	370720	3350917
2000	387806	3721637
2001	484807	4109443
2002	505362	4594250
2003	598698	5099612
2004	631865	5698310
2005	736417	6330175
2006	806247	7066592
2007	886384	7872839
2008	1027554	8759223
2009	950006	9786777
2010	968767	10736783
2011	865475	11705550
2012	939796	12571025
2013	1408303	13510821
2014	1199735	14919124
2015	1172229	16118859
2016	1087092	17291088
2017	1435206	18378180
2018	1629764	19813386
2019	1729263	21443150
2020	0	23172413

## Sheet: Fit Bahrain
SUMMARY OUTPUT
Regression Statistics
Multiple R	1
R Square	1
Adjusted R Square	1
Standard Error	5.26583e-16
Observations	107
ANOVA
	df	SS	MS	F	Significance F
Regression	1	14.6992	14.6992	5.30104e+31	0
Residual	105	2.91154e-29	2.7729e-31
Total	106	14.6992
	Coefficients	Standard Error	t Stat	P-value	Lower 95%	Upper 95%	Lower 95.0%	Upper 95.0%
Intercept	33.8453	3.41867e-15	9900129796972380	0	33.8453	33.8453	33.8453	33.8453
X Variable 1	-0.012	1.64817e-18	-7280821665747423	0	-0.012	-0.012	-0.012	-0.012
RESIDUAL OUTPUT
Observation	Predicted Y	Residuals
1	9.59332	0
2	9.58132	-3.55271e-15
3	9.56932	-3.55271e-15
4	9.55732	-1.77636e-15
5	9.54532	-1.77636e-15
6	9.53332	-1.77636e-15
7	9.52132	-1.77636e-15
8	9.50932	0
9	9.49732	-3.55271e-15
10	9.48532	-3.55271e-15
11	9.47332	-3.55271e-15
12	9.46132	-1.77636e-15
13	9.44932	-1.77636e-15
14	9.43732	-1.77636e-15
15	9.42532	-1.77636e-15
16	9.41332	0
17	9.40132	-3.55271e-15
18	9.38932	-3.55271e-15
19	9.37732	-1.77636e-15
20	9.36532	-1.77636e-15
21	9.35332	-1.77636e-15
22	9.34132	-1.77636e-15
23	9.32932	-1.77636e-15
24	9.31732	0
25	9.30532	-3.55271e-15
26	9.29332	-3.55271e-15
27	9.28132	-3.55271e-15
28	9.26932	-1.77636e-15
29	9.25732	-1.77636e-15
30	9.24532	-1.77636e-15
31	9.23332	0
32	9.22132	-3.55271e-15
33	9.20932	-3.55271e-15
34	9.19732	-3.55271e-15
35	9.18532	-1.77636e-15
36	9.17332	-1.77636e-15
37	9.16132	-1.77636e-15
38	9.14932	-1.77636e-15
39	9.13732	0
40	9.12532	-3.55271e-15
41	9.11332	-3.55271e-15
42	9.10132	-3.55271e-15
43	9.08932	-1.77636e-15
44	9.07732	-1.77636e-15
45	9.06532	-1.77636e-15
46	9.05332	-1.77636e-15
47	9.04132	0
48	9.02932	-3.55271e-15
49	9.01732	-3.55271e-15
50	9.00532	-3.55271e-15
51	8.99332	-1.77636e-15
52	8.98132	-1.77636e-15
53	8.96932	-1.77636e-15
54	8.95732	0
55	8.94532	-3.55271e-15
56	8.93332	-3.55271e-15
57	8.92132	-3.55271e-15
58	8.90932	-1.77636e-15
59	8.89732	-1.77636e-15
60	8.88532	-1.77636e-15
61	8.87332	-1.77636e-15
62	8.86132	0
63	8.84932	-3.55271e-15
64	8.83732	-3.55271e-15
65	8.82532	-3.55271e-15
66	8.81332	-1.77636e-15
67	8.80132	-1.77636e-15
68	8.78932	-1.77636e-15
69	8.77732	-1.77636e-15
70	8.76532	0
71	8.75332	-3.55271e-15
72	8.74132	-3.55271e-15
73	8.72932	-3.55271e-15
74	8.71732	-1.77636e-15
75	8.70532	-1.77636e-15
76	8.69332	-1.77636e-15
77	8.68132	-1.77636e-15
78	8.66932	-3.55271e-15
79	8.65732	-3.55271e-15
80	8.64532	-3.55271e-15
81	8.63332	-3.55271e-15
82	8.62132	-1.77636e-15
83	8.60932	-1.77636e-15
84	8.59732	-1.77636e-15
85	8.58532	-1.77636e-15
86	8.57332	-3.55271e-15
87	8.56132	-3.55271e-15
88	8.54932	-3.55271e-15
89	8.53732	-1.77636e-15
90	8.52532	-1.77636e-15
91	8.51332	-1.77636e-15
92	8.50132	-1.77636e-15
93	8.48932	0
94	8.47732	-3.55271e-15
95	8.46532	-3.55271e-15
96	8.45332	-3.55271e-15
97	8.44132	-1.77636e-15
98	8.42932	-1.77636e-15
99	8.41732	-1.77636e-15
100	8.40532	-1.77636e-15
101	8.39332	-3.55271e-15
102	8.38132	-3.55271e-15
103	8.36932	-3.55271e-15
104	8.35732	-3.55271e-15
105	8.34532	-1.77636e-15
106	8.33332	-1.77636e-15
107	8.32132	-1.77636e-15

## Sheet: Bahrain Parameters and Data
Total Waste in Place		23172413	tonnes
Total Degradable Waste		1.28607e+07	tonnes	(55.5% of total, includes, food,paper and cardboard, textiles, other organics, and misc. combustibles)
Location		Bahrain
Avg. Rainfall		715	mm
LandGem Model k		0.012
Years Since Landfill Closure	Year	CH4 emissions LandGEM (tonnes)	CO2 emissions LandGEM (tonnes)	LandGem Ln(CH4)	Model Predicted Ln(CH4)	From Fit CH4 emissions LandGEM (tonnes)	From Fit CO2 emissions LandGEM (tonnes)	Cumulative Waste Decomposed (tonnes)	Percentage of Degradable Waste Placed That has Decomposed	Percentage of Total Waste Placed That has Decomposed
	1987	0						0	0
	1988	134.98	371.196					506.177	0.00393584
	1989	278.064	764.675					1548.92	0.0120438
	1990	429.853	1182.09					3160.86	0.0245777
	1991	590.993	1625.23					5377.09	0.0418103
	1992	762.176	2095.98					8235.25	0.0640343
	1993	944.143	2596.39					11775.8	0.0915642
	1994	1137.69	3128.64					16042.1	0.124738
	1995	1343.66	3695.07					21080.8	0.163917
	1996	1562.98	4298.19					26942	0.209491
	1997	1796.62	4940.69					33679.3	0.261878
	1998	2037.53	5603.21					41320.1	0.32129
	1999	2285.72	6285.74					49891.5	0.387938
	2000	2525.87	6946.16					59363.6	0.461589
	2001	2775.49	7632.59					69771.6	0.542519
	2002	3092.09	8503.25					81367	0.63268
	2003	3419.75	9404.3					94191	0.732395
	2004	3810.82	10479.8					108482	0.843513
	2005	4221.16	11608.2					124311	0.966596
	2006	4702.01	12930.5					141943	1.1037
	2007	5227.51	14375.6					161547	1.25613
	2008	5804.54	15962.5					183314	1.42538
	2009	6476.52	17810.4					207601	1.61423
	2010	7084.54	19482.5					234168	1.8208
	2011	7698.85	21171.8					263038	2.04529
	2012	8231.32	22636.1					293906	2.2853
	2013	8811.05	24230.4					326947	2.54222
	2014	9721.82	26735					363404	2.8257
	2015	10471.3	28796					402671	3.13102
	2016	11191.9	30777.8					444641	3.45737
	2017	11842.6	32567.2					489051	3.80268
	2018	12736.6	35025.7					536813	4.17406
	2019	13760.3	37840.9					588414	4.57529
	2020	14843.6	40819.8					644078	5.00811
1	2021	14666.5		9.59332	9.59332	14666.5	40332.9	699077	5.43577
2	2022	14491.6		9.58132	9.58132	14491.6	39851.8	753420	5.85832
3	2023	14318.7		9.56932	9.56932	14318.7	39376.4	807116	6.27583
4	2024	14147.9		9.55732	9.55732	14147.9	38906.7	860170	6.68837
5	2025	13979.1		9.54532	9.54532	13979.1	38442.6	912592	7.09598
6	2026	13812.4		9.53332	9.53332	13812.4	37984.1	964389	7.49873
7	2027	13647.6		9.52132	9.52132	13647.6	37531	1.01557e+06	7.89668
8	2028	13484.8		9.50932	9.50932	13484.8	37083.3	1.06614e+06	8.28988
9	2029	13324		9.49732	9.49732	13324	36641	1.1161e+06	8.67839
10	2030	13165.1		9.48532	9.48532	13165.1	36203.9	1.16547e+06	9.06226
11	2031	13008		9.47332	9.47332	13008	35772.1	1.21425e+06	9.44156
12	2032	12852.9		9.46132	9.46132	12852.9	35345.4	1.26245e+06	9.81633
13	2033	12699.5		9.44932	9.44932	12699.5	34923.8	1.31007e+06	10.1866
14	2034	12548.1		9.43732	9.43732	12548.1	34507.2	1.35713e+06	10.5525
15	2035	12398.4		9.42532	9.42532	12398.4	34095.6	1.40362e+06	10.914
16	2036	12250.5		9.41332	9.41332	12250.5	33688.9	1.44956e+06	11.2712
17	2037	12104.4		9.40132	9.40132	12104.4	33287	1.49495e+06	11.6242
18	2038	11960		9.38932	9.38932	11960	32890	1.5398e+06	11.9729
19	2039	11817.3		9.37732	9.37732	11817.3	32497.6	1.58412e+06	12.3175
20	2040	11676.4		9.36532	9.36532	11676.4	32110	1.6279e+06	12.658
21	2041	11537.1		9.35332	9.35332	11537.1	31727	1.67117e+06	12.9944
22	2042	11399.5		9.34132	9.34132	11399.5	31348.5	1.71391e+06	13.3268
23	2043	11263.5		9.32932	9.32932	11263.5	30974.6	1.75615e+06	13.6552
24	2044	11129.1		9.31732	9.31732	11129.1	30605.1	1.79789e+06	13.9797
25	2045	10996.4		9.30532	9.30532	10996.4	30240.1	1.83912e+06	14.3003
26	2046	10865.2		9.29332	9.29332	10865.2	29879.3	1.87987e+06	14.6172
27	2047	10735.6		9.28132	9.28132	10735.6	29522.9	1.92013e+06	14.9302
28	2048	10607.6		9.26932	9.26932	10607.6	29170.8	1.9599e+06	15.2395
29	2049	10481		9.25732	9.25732	10481	28822.8	1.99921e+06	15.5451
30	2050	10356		9.24532	9.24532	10356	28479	2.03804e+06	15.8471
31	2051	10232.5		9.23332	9.23332	10232.5	28139.3	2.07642e+06	16.1454
32	2052	10110.4		9.22132	9.22132	10110.4	27803.7	2.11433e+06	16.4402
33	2053	9989.82		9.20932	9.20932	9989.82	27472	2.15179e+06	16.7315
34	2054	9870.66		9.19732	9.19732	9870.66	27144.3	2.18881e+06	17.0194
35	2055	9752.92		9.18532	9.18532	9752.92	26820.5	2.22538e+06	17.3037
36	2056	9636.58		9.17332	9.17332	9636.58	26500.6	2.26152e+06	17.5847
37	2057	9521.63		9.16132	9.16132	9521.63	26184.5	2.29722e+06	17.8624
38	2058	9408.06		9.14932	9.14932	9408.06	25872.2	2.3325e+06	18.1367
39	2059	9295.84		9.13732	9.13732	9295.84	25563.5	2.36736e+06	18.4077
40	2060	9184.95		9.12532	9.12532	9184.95	25258.6	2.40181e+06	18.6756
41	2061	9075.39		9.11332	9.11332	9075.39	24957.3	2.43584e+06	18.9402
42	2062	8967.14		9.10132	9.10132	8967.14	24659.6	2.46947e+06	19.2017
43	2063	8860.17		9.08932	9.08932	8860.17	24365.5	2.50269e+06	19.46
44	2064	8754.49		9.07732	9.07732	8754.49	24074.8	2.53552e+06	19.7153
45	2065	8650.06		9.06532	9.06532	8650.06	23787.7	2.56796e+06	19.9675
46	2066	8546.88		9.05332	9.05332	8546.88	23503.9	2.60001e+06	20.2167
47	2067	8444.93		9.04132	9.04132	8444.93	23223.6	2.63168e+06	20.463
48	2068	8344.2		9.02932	9.02932	8344.2	22946.5	2.66297e+06	20.7063
49	2069	8244.67		9.01732	9.01732	8244.67	22672.8	2.69389e+06	20.9467
50	2070	8146.32		9.00532	9.00532	8146.32	22402.4	2.72443e+06	21.1842
51	2071	8049.15		8.99332	8.99332	8049.15	22135.2	2.75462e+06	21.4189
52	2072	7953.14		8.98132	8.98132	7953.14	21871.1	2.78444e+06	21.6508
53	2073	7858.27		8.96932	8.96932	7858.27	21610.2	2.81391e+06	21.8799
54	2074	7764.53		8.95732	8.95732	7764.53	21352.5	2.84303e+06	22.1063
55	2075	7671.92		8.94532	8.94532	7671.92	21097.8	2.8718e+06	22.33
56	2076	7580.4		8.93332	8.93332	7580.4	20846.1	2.90022e+06	22.5511
57	2077	7489.98		8.92132	8.92132	7489.98	20597.5	2.92831e+06	22.7695
58	2078	7400.64		8.90932	8.90932	7400.64	20351.8	2.95606e+06	22.9853
59	2079	7312.36		8.89732	8.89732	7312.36	20109	2.98349e+06	23.1985
60	2080	7225.14		8.88532	8.88532	7225.14	19869.1	3.01058e+06	23.4092
61	2081	7138.96		8.87332	8.87332	7138.96	19632.1	3.03735e+06	23.6173
62	2082	7053.8		8.86132	8.86132	7053.8	19398	3.0638e+06	23.823
63	2083	6969.66		8.84932	8.84932	6969.66	19166.6	3.08994e+06	24.0262
64	2084	6886.52		8.83732	8.83732	6886.52	18937.9	3.11576e+06	24.227
65	2085	6804.38		8.82532	8.82532	6804.38	18712	3.14128e+06	24.4254
66	2086	6723.22		8.81332	8.81332	6723.22	18488.8	3.16649e+06	24.6215
67	2087	6643.02		8.80132	8.80132	6643.02	18268.3	3.1914e+06	24.8152
68	2088	6563.78		8.78932	8.78932	6563.78	18050.4	3.21602e+06	25.0066
69	2089	6485.48		8.77732	8.77732	6485.48	17835.1	3.24034e+06	25.1957
70	2090	6408.12		8.76532	8.76532	6408.12	17622.3	3.26437e+06	25.3825
71	2091	6331.69		8.75332	8.75332	6331.69	17412.1	3.28811e+06	25.5672
72	2092	6256.16		8.74132	8.74132	6256.16	17204.4	3.31157e+06	25.7496
73	2093	6181.53		8.72932	8.72932	6181.53	16999.2	3.33475e+06	25.9298
74	2094	6107.8		8.71732	8.71732	6107.8	16796.4	3.35766e+06	26.1079
75	2095	6034.94		8.70532	8.70532	6034.94	16596.1	3.38029e+06	26.2839
76	2096	5962.96		8.69332	8.69332	5962.96	16398.1	3.40265e+06	26.4578
77	2097	5891.83		8.68132	8.68132	5891.83	16202.5	3.42474e+06	26.6296
78	2098	5821.55		8.66932	8.66932	5821.55	16009.3	3.44658e+06	26.7993
79	2099	5752.11		8.65732	8.65732	5752.11	15818.3	3.46815e+06	26.967
80	2100	5683.5		8.64532	8.64532	5683.5	15629.6	3.48946e+06	27.1328
81	2101	5615.7		8.63332	8.63332	5615.7	15443.2	3.51052e+06	27.2965
82	2102	5548.72		8.62132	8.62132	5548.72	15259	3.53133e+06	27.4583
83	2103	5482.53		8.60932	8.60932	5482.53	15077	3.55188e+06	27.6182
84	2104	5417.13		8.59732	8.59732	5417.13	14897.1	3.5722e+06	27.7761
85	2105	5352.51		8.58532	8.58532	5352.51	14719.4	3.59227e+06	27.9322
86	2106	5288.67		8.57332	8.57332	5288.67	14543.8	3.6121e+06	28.0864
87	2107	5225.58		8.56132	8.56132	5225.58	14370.4	3.6317e+06	28.2388
88	2108	5163.25		8.54932	8.54932	5163.25	14198.9	3.65106e+06	28.3893
89	2109	5101.66		8.53732	8.53732	5101.66	14029.6	3.67019e+06	28.5381
90	2110	5040.81		8.52532	8.52532	5040.81	13862.2	3.6891e+06	28.6851
91	2111	4980.68		8.51332	8.51332	4980.68	13696.9	3.70777e+06	28.8303
92	2112	4921.27		8.50132	8.50132	4921.27	13533.5	3.72623e+06	28.9738
93	2113	4862.57		8.48932	8.48932	4862.57	13372.1	3.74446e+06	29.1156
94	2114	4804.56		8.47732	8.47732	4804.56	13212.6	3.76248e+06	29.2557
95	2115	4747.25		8.46532	8.46532	4747.25	13055	3.78028e+06	29.3941
96	2116	4690.63		8.45332	8.45332	4690.63	12899.2	3.79787e+06	29.5309
97	2117	4634.68		8.44132	8.44132	4634.68	12745.4	3.81525e+06	29.666
98	2118	4579.39		8.42932	8.42932	4579.39	12593.3	3.83242e+06	29.7995
99	2119	4524.77		8.41732	8.41732	4524.77	12443.1	3.84939e+06	29.9315
100	2120	4470.8		8.40532	8.40532	4470.8	12294.7	3.86616e+06	30.0618
101	2121	4417.47		8.39332	8.39332	4417.47	12148	3.88272e+06	30.1906
102	2122	4364.77		8.38132	8.38132	4364.77	12003.1	3.89909e+06	30.3179
103	2123	4312.71		8.36932	8.36932	4312.71	11860	3.91526e+06	30.4437
104	2124	4261.27		8.35732	8.35732	4261.27	11718.5	3.93124e+06	30.5679
105	2125	4210.44		8.34532	8.34532	4210.44	11578.7	3.94703e+06	30.6907
106	2126	4160.21		8.33332	8.33332	4160.21	11440.6	3.96263e+06	30.812
107	2127	4110.59		8.32132	8.32132	4110.59	11304.1	3.97805e+06	30.9318
108	2128				8.30932	4061.56	11169.3	3.99328e+06	31.0503
109	2129				8.29732	4013.11	11036.1	4.00833e+06	31.1673
110	2130				8.28532	3965.24	10904.4	4.0232e+06	31.2829
111	2131				8.27332	3917.94	10774.3	4.03789e+06	31.3972
112	2132				8.26132	3871.21	10645.8	4.05241e+06	31.51
113	2133				8.24932	3825.03	10518.8	4.06675e+06	31.6216
114	2134				8.23732	3779.4	10393.4	4.08092e+06	31.7318
115	2135				8.22532	3734.32	10269.4	4.09493e+06	31.8407
116	2136				8.21332	3689.78	10146.9	4.10876e+06	31.9482
117	2137				8.20132	3645.77	10025.9	4.12244e+06	32.0546
118	2138				8.18932	3602.28	9906.27	4.13594e+06	32.1596
119	2139				8.17732	3559.31	9788.1	4.14929e+06	32.2634
120	2140				8.16532	3516.85	9671.35	4.16248e+06	32.3659
121	2141				8.15332	3474.9	9555.98	4.17551e+06	32.4672
122	2142				8.14132	3433.45	9442	4.18839e+06	32.5674
123	2143				8.12932	3392.5	9329.37	4.20111e+06	32.6663
124	2144				8.11732	3352.03	9218.09	4.21368e+06	32.764
125	2145				8.10532	3312.05	9108.13	4.2261e+06	32.8606
126	2146				8.09332	3272.54	8999.49	4.23837e+06	32.956
127	2147				8.08132	3233.5	8892.14	4.2505e+06	33.0503
128	2148				8.06932	3194.93	8786.07	4.26248e+06	33.1435
129	2149				8.05732	3156.82	8681.27	4.27432e+06	33.2355
130	2150				8.04532	3119.17	8577.71	4.28601e+06	33.3265
131	2151				8.03332	3081.96	8475.4	4.29757e+06	33.4163
132	2152				8.02132	3045.2	8374.3	4.30899e+06	33.5051
133	2153				8.00932	3008.88	8274.41	4.32027e+06	33.5929
134	2154				7.99732	2972.99	8175.71	4.33142e+06	33.6795
135	2155				7.98532	2937.52	8078.19	4.34244e+06	33.7652
136	2156				7.97332	2902.48	7981.83	4.35332e+06	33.8498
137	2157				7.96132	2867.86	7886.62	4.36408e+06	33.9335
138	2158				7.94932	2833.65	7792.54	4.3747e+06	34.0161
139	2159				7.93732	2799.85	7699.59	4.3852e+06	34.0977
140	2160				7.92532	2766.45	7607.75	4.39558e+06	34.1784
141	2161				7.91332	2733.46	7517	4.40583e+06	34.2581
142	2162				7.90132	2700.85	7427.34	4.41595e+06	34.3368
143	2163				7.88932	2668.63	7338.74	4.42596e+06	34.4147
144	2164				7.87732	2636.8	7251.2	4.43585e+06	34.4915
145	2165				7.86532	2605.35	7164.71	4.44562e+06	34.5675
146	2166				7.85332	2574.27	7079.25	4.45527e+06	34.6426
147	2167				7.84132	2543.56	6994.8	4.46481e+06	34.7167
148	2168				7.82932	2513.22	6911.37	4.47424e+06	34.79
149	2169				7.81732	2483.25	6828.93	4.48355e+06	34.8624
150	2170				7.80532	2453.62	6747.47	4.49275e+06	34.934
151	2171				7.79332	2424.36	6666.98	4.50184e+06	35.0047
152	2172				7.78132	2395.44	6587.46	4.51082e+06	35.0745
153	2173				7.76932	2366.87	6508.88	4.5197e+06	35.1435
154	2174				7.75732	2338.63	6431.24	4.52847e+06	35.2117
155	2175				7.74532	2310.74	6354.53	4.53713e+06	35.2791
156	2176				7.73332	2283.17	6278.73	4.5457e+06	35.3457
157	2177				7.72132	2255.94	6203.83	4.55416e+06	35.4114
158	2178				7.70932	2229.03	6129.83	4.56252e+06	35.4764
159	2179				7.69732	2202.44	6056.71	4.57077e+06	35.5407
160	2180				7.68532	2176.17	5984.47	4.57894e+06	35.6041
161	2181				7.67332	2150.21	5913.08	4.587e+06	35.6668
162	2182				7.66132	2124.56	5842.55	4.59497e+06	35.7288
163	2183				7.64932	2099.22	5772.86	4.60284e+06	35.79
164	2184				7.63732	2074.18	5704	4.61062e+06	35.8505
165	2185				7.62532	2049.44	5635.96	4.6183e+06	35.9102
166	2186				7.61332	2024.99	5568.73	4.62589e+06	35.9693
167	2187				7.60132	2000.84	5502.31	4.6334e+06	36.0276
168	2188				7.58932	1976.97	5436.67	4.64081e+06	36.0852
169	2189				7.57732	1953.39	5371.82	4.64814e+06	36.1422
170	2190				7.56532	1930.09	5307.75	4.65537e+06	36.1985
171	2191				7.55332	1907.07	5244.43	4.66253e+06	36.2541
172	2192				7.54132	1884.32	5181.88	4.66959e+06	36.309
173	2193				7.52932	1861.84	5120.07	4.67657e+06	36.3633
174	2194				7.51732	1839.63	5058.99	4.68347e+06	36.417
175	2195				7.50532	1817.69	4998.65	4.69029e+06	36.47
176	2196				7.49332	1796.01	4939.02	4.69702e+06	36.5223
177	2197				7.48132	1774.58	4880.11	4.70368e+06	36.5741
178	2198				7.46932	1753.42	4821.9	4.71025e+06	36.6252
179	2199				7.45732	1732.5	4764.38	4.71675e+06	36.6757
180	2200				7.44532	1711.84	4707.55	4.72317e+06	36.7256
181	2201				7.43332	1691.42	4651.4	4.72951e+06	36.775
182	2202				7.42132	1671.24	4595.91	4.73578e+06	36.8237
183	2203				7.40932	1651.31	4541.09	4.74197e+06	36.8718
184	2204				7.39732	1631.61	4486.92	4.74809e+06	36.9194
185	2205				7.38532	1612.15	4433.4	4.75414e+06	36.9664
186	2206				7.37332	1592.92	4380.52	4.76011e+06	37.0129
187	2207				7.36132	1573.92	4328.27	4.76601e+06	37.0588
188	2208				7.34932	1555.14	4276.64	4.77184e+06	37.1041
189	2209				7.33732	1536.59	4225.63	4.77761e+06	37.1489
190	2210				7.32532	1518.26	4175.22	4.7833e+06	37.1932
191	2211				7.31332	1500.15	4125.42	4.78893e+06	37.2369
192	2212				7.30132	1482.26	4076.21	4.79448e+06	37.2801
193	2213				7.28932	1464.58	4027.59	4.79998e+06	37.3229
194	2214				7.27732	1447.11	3979.54	4.8054e+06	37.365
195	2215				7.26532	1429.85	3932.08	4.81076e+06	37.4067
196	2216				7.25332	1412.79	3885.17	4.81606e+06	37.4479
197	2217				7.24132	1395.94	3838.83	4.8213e+06	37.4886
198	2218				7.22932	1379.29	3793.04	4.82647e+06	37.5289
199	2219				7.21732	1362.83	3747.79	4.83158e+06	37.5686
200	2220				7.20532	1346.58	3703.09	4.83663e+06	37.6079
201	2221				7.19332	1330.52	3658.92	4.84162e+06	37.6467
202	2222				7.18132	1314.64	3615.27	4.84655e+06	37.685
203	2223				7.16932	1298.96	3572.15	4.85142e+06	37.7229
204	2224				7.15732	1283.47	3529.54	4.85623e+06	37.7603
205	2225				7.14532	1268.16	3487.44	4.86099e+06	37.7973
206	2226				7.13332	1253.03	3445.84	4.86569e+06	37.8338
207	2227				7.12132	1238.09	3404.74	4.87033e+06	37.8699
208	2228				7.10932	1223.32	3364.12	4.87492e+06	37.9056
209	2229				7.09732	1208.73	3324	4.87945e+06	37.9408
210	2230				7.08532	1194.31	3284.35	4.88393e+06	37.9756
211	2231				7.07332	1180.06	3245.17	4.88836e+06	38.0101
212	2232				7.06132	1165.99	3206.46	4.89273e+06	38.0441
213	2233				7.04932	1152.08	3168.21	4.89705e+06	38.0776
214	2234				7.03732	1138.33	3130.42	4.90132e+06	38.1108
215	2235				7.02532	1124.76	3093.08	4.90553e+06	38.1436
216	2236				7.01332	1111.34	3056.19	4.9097e+06	38.176
217	2237				7.00132	1098.08	3019.73	4.91382e+06	38.2081
218	2238				6.98932	1084.99	2983.71	4.91789e+06	38.2397
219	2239				6.97732	1072.04	2948.12	4.92191e+06	38.271
220	2240				6.96532	1059.26	2912.95	4.92588e+06	38.3018
221	2241				6.95332	1046.62	2878.21	4.92981e+06	38.3324
222	2242				6.94132	1034.14	2843.87	4.93368e+06	38.3625
223	2243				6.92932	1021.8	2809.95	4.93752e+06	38.3923
224	2244				6.91732	1009.61	2776.43	4.9413e+06	38.4217
225	2245				6.90532	997.569	2743.32	4.94504e+06	38.4508
226	2246				6.89332	985.67	2710.59	4.94874e+06	38.4796
227	2247				6.88132	973.913	2678.26	4.95239e+06	38.508
228	2248				6.86932	962.296	2646.31	4.956e+06	38.536
229	2249				6.85732	950.817	2614.75	4.95956e+06	38.5638
230	2250				6.84532	939.476	2583.56	4.96309e+06	38.5912
231	2251				6.83332	928.269	2552.74	4.96657e+06	38.6182
232	2252				6.82132	917.197	2522.29	4.97001e+06	38.645
233	2253				6.80932	906.256	2492.2	4.97341e+06	38.6714
234	2254				6.79732	895.446	2462.48	4.97676e+06	38.6975
235	2255				6.78532	884.765	2433.1	4.98008e+06	38.7233
236	2256				6.77332	874.211	2404.08	4.98336e+06	38.7488
237	2257				6.76132	863.783	2375.4	4.9866e+06	38.774
238	2258				6.74932	853.48	2347.07	4.9898e+06	38.7989
239	2259				6.73732	843.299	2319.07	4.99296e+06	38.8234
240	2260				6.72532	833.24	2291.41	4.99609e+06	38.8477
241	2261				6.71332	823.301	2264.08	4.99918e+06	38.8718
242	2262				6.70132	813.48	2237.07	5.00223e+06	38.8955
243	2263				6.68932	803.777	2210.39	5.00524e+06	38.9189
244	2264				6.67732	794.189	2184.02	5.00822e+06	38.9421
245	2265				6.66532	784.716	2157.97	5.01116e+06	38.9649
246	2266				6.65332	775.356	2132.23	5.01407e+06	38.9876
247	2267				6.64132	766.107	2106.79	5.01694e+06	39.0099
248	2268				6.62932	756.969	2081.66	5.01978e+06	39.032
249	2269				6.61732	747.939	2056.83	5.02258e+06	39.0538
250	2270				6.60532	739.018	2032.3	5.02536e+06	39.0753
251	2271				6.59332	730.202	2008.06	5.02809e+06	39.0966
252	2272				6.58132	721.492	1984.1	5.0308e+06	39.1177
253	2273				6.56932	712.886	1960.44	5.03347e+06	39.1384
254	2274				6.55732	704.383	1937.05	5.03611e+06	39.159
255	2275				6.54532	695.981	1913.95	5.03872e+06	39.1793
256	2276				6.53332	687.679	1891.12	5.0413e+06	39.1993
257	2277				6.52132	679.476	1868.56	5.04385e+06	39.2191
258	2278				6.50932	671.371	1846.27	5.04637e+06	39.2387
259	2279				6.49732	663.363	1824.25	5.04886e+06	39.2581
260	2280				6.48532	655.45	1802.49	5.05131e+06	39.2772
261	2281				6.47332	647.631	1780.99	5.05374e+06	39.2961
262	2282				6.46132	639.906	1759.74	5.05614e+06	39.3147
263	2283				6.44932	632.273	1738.75	5.05851e+06	39.3331
264	2284				6.43732	624.731	1718.01	5.06086e+06	39.3514
265	2285				6.42532	617.279	1697.52	5.06317e+06	39.3694
266	2286				6.41332	609.916	1677.27	5.06546e+06	39.3871
267	2287				6.40132	602.641	1657.26	5.06772e+06	39.4047
268	2288				6.38932	595.453	1637.49	5.06995e+06	39.4221
269	2289				6.37732	588.35	1617.96	5.07216e+06	39.4392
270	2290				6.36532	581.332	1598.66	5.07434e+06	39.4562
271	2291				6.35332	574.398	1579.59	5.07649e+06	39.4729
272	2292				6.34132	567.546	1560.75	5.07862e+06	39.4895
273	2293				6.32932	560.776	1542.13	5.08072e+06	39.5058
274	2294				6.31732	554.087	1523.74	5.0828e+06	39.522
275	2295				6.30532	547.478	1505.56	5.08485e+06	39.538
276	2296				6.29332	540.947	1487.6	5.08688e+06	39.5537
277	2297				6.28132	534.495	1469.86	5.08889e+06	39.5693
278	2298				6.26932	528.119	1452.33	5.09087e+06	39.5847
279	2299				6.25732	521.82	1435	5.09282e+06	39.5999
280	2300				6.24532	515.595	1417.89	5.09476e+06	39.615
281	2301				6.23332	509.445	1400.97	5.09667e+06	39.6298
282	2302				6.22132	503.368	1384.26	5.09856e+06	39.6445
283	2303				6.20932	497.364	1367.75	5.10042e+06	39.659
284	2304				6.19732	491.431	1351.44	5.10226e+06	39.6733
285	2305				6.18532	485.569	1335.32	5.10408e+06	39.6875
286	2306				6.17332	479.777	1319.39	5.10588e+06	39.7015
287	2307				6.16132	474.054	1303.65	5.10766e+06	39.7153
288	2308				6.14932	468.4	1288.1	5.10942e+06	39.729
289	2309				6.13732	462.812	1272.73	5.11115e+06	39.7425
290	2310				6.12532	457.292	1257.55	5.11287e+06	39.7558
291	2311				6.11332	451.837	1242.55	5.11456e+06	39.769
292	2312				6.10132	446.447	1227.73	5.11624e+06	39.782
293	2313				6.08932	441.122	1213.09	5.11789e+06	39.7948
294	2314				6.07732	435.86	1198.62	5.11953e+06	39.8075
295	2315				6.06532	430.661	1184.32	5.12114e+06	39.8201
296	2316				6.05332	425.524	1170.19	5.12274e+06	39.8325
297	2317				6.04132	420.448	1156.23	5.12431e+06	39.8448
298	2318				6.02932	415.433	1142.44	5.12587e+06	39.8569
299	2319				6.01732	410.478	1128.81	5.12741e+06	39.8689
300	2320				6.00532	405.581	1115.35	5.12893e+06	39.8807
301	2321				5.99332	400.744	1102.04	5.13043e+06	39.8924
302	2322				5.98132	395.963	1088.9	5.13192e+06	39.9039
303	2323				5.96932	391.24	1075.91	5.13339e+06	39.9153
304	2324				5.95732	386.573	1063.08	5.13484e+06	39.9266
305	2325				5.94532	381.962	1050.4	5.13627e+06	39.9377
306	2326				5.93332	377.406	1037.87	5.13768e+06	39.9487
307	2327				5.92132	372.904	1025.49	5.13908e+06	39.9596
308	2328				5.90932	368.456	1013.25	5.14046e+06	39.9704
309	2329				5.89732	364.061	1001.17	5.14183e+06	39.981
310	2330				5.88532	359.718	989.226	5.14318e+06	39.9915
311	2331				5.87332	355.428	977.426	5.14451e+06	40.0018
312	2332				5.86132	351.188	965.767	5.14583e+06	40.0121
313	2333				5.84932	346.999	954.247	5.14713e+06	40.0222
314	2334				5.83732	342.86	942.865	5.14841e+06	40.0322
315	2335				5.82532	338.77	931.618	5.14968e+06	40.0421
316	2336				5.81332	334.729	920.505	5.15094e+06	40.0518
317	2337				5.80132	330.736	909.525	5.15218e+06	40.0615
318	2338				5.78932	326.791	898.676	5.15341e+06	40.071
319	2339				5.77732	322.893	887.956	5.15462e+06	40.0804
320	2340				5.76532	319.042	877.365	5.15581e+06	40.0897
321	2341				5.75332	315.236	866.899	5.15699e+06	40.0989
322	2342				5.74132	311.476	856.559	5.15816e+06	40.108
323	2343				5.72932	307.76	846.341	5.15932e+06	40.117
324	2344				5.71732	304.089	836.246	5.16046e+06	40.1258
325	2345				5.70532	300.462	826.271	5.16158e+06	40.1346
326	2346				5.69332	296.878	816.415	5.1627e+06	40.1432
327	2347				5.68132	293.337	806.676	5.1638e+06	40.1518
328	2348				5.66932	289.838	797.054	5.16488e+06	40.1602
329	2349				5.65732	286.381	787.547	5.16596e+06	40.1686
330	2350				5.64532	282.965	778.153	5.16702e+06	40.1768
331	2351				5.63332	279.589	768.871	5.16807e+06	40.185
332	2352				5.62132	276.254	759.699	5.1691e+06	40.1931
333	2353				5.60932	272.959	750.637	5.17013e+06	40.201
334	2354				5.59732	269.703	741.684	5.17114e+06	40.2089
335	2355				5.58532	266.486	732.837	5.17214e+06	40.2166
336	2356				5.57332	263.307	724.095	5.17313e+06	40.2243
337	2357				5.56132	260.166	715.458	5.1741e+06	40.2319
338	2358				5.54932	257.063	706.924	5.17506e+06	40.2394
339	2359				5.53732	253.997	698.491	5.17602e+06	40.2468
340	2360				5.52532	250.967	690.159	5.17696e+06	40.2541
341	2361				5.51332	247.973	681.927	5.17789e+06	40.2614
342	2362				5.50132	245.016	673.793	5.17881e+06	40.2685
343	2363				5.48932	242.093	665.756	5.17971e+06	40.2756
344	2364				5.47732	239.205	657.814	5.18061e+06	40.2825
345	2365				5.46532	236.352	649.968	5.1815e+06	40.2894
346	2366				5.45332	233.533	642.215	5.18237e+06	40.2962
347	2367				5.44132	230.747	634.554	5.18324e+06	40.303
348	2368				5.42932	227.995	626.985	5.18409e+06	40.3096
349	2369				5.41732	225.275	619.506	5.18494e+06	40.3162
350	2370				5.40532	222.588	612.117	5.18577e+06	40.3227
351	2371				5.39332	219.933	604.815	5.1866e+06	40.3291
352	2372				5.38132	217.309	597.601	5.18741e+06	40.3354
353	2373				5.36932	214.717	590.472	5.18822e+06	40.3417
354	2374				5.35732	212.156	583.429	5.18901e+06	40.3479
355	2375				5.34532	209.625	576.47	5.1898e+06	40.354
356	2376				5.33332	207.125	569.593	5.19058e+06	40.36
357	2377				5.32132	204.654	562.799	5.19134e+06	40.366
358	2378				5.30932	202.213	556.086	5.1921e+06	40.3719
359	2379				5.29732	199.801	549.453	5.19285e+06	40.3777
360	2380				5.28532	197.418	542.899	5.19359e+06	40.3835
361	2381				5.27332	195.063	536.423	5.19432e+06	40.3892
362	2382				5.26132	192.736	530.024	5.19505e+06	40.3948
363	2383				5.24932	190.437	523.702	5.19576e+06	40.4003
364	2384				5.23732	188.165	517.455	5.19647e+06	40.4058
365	2385				5.22532	185.921	511.283	5.19716e+06	40.4112
366	2386				5.21332	183.703	505.184	5.19785e+06	40.4166
367	2387				5.20132	181.512	499.158	5.19853e+06	40.4219
368	2388				5.18932	179.347	493.204	5.19921e+06	40.4271
369	2389				5.17732	177.208	487.321	5.19987e+06	40.4323
370	2390				5.16532	175.094	481.508	5.20053e+06	40.4374
371	2391				5.15332	173.005	475.764	5.20118e+06	40.4424
372	2392				5.14132	170.942	470.089	5.20182e+06	40.4474
373	2393				5.12932	168.903	464.482	5.20245e+06	40.4523
374	2394				5.11732	166.888	458.941	5.20308e+06	40.4572
375	2395				5.10532	164.897	453.467	5.20369e+06	40.462
376	2396				5.09332	162.93	448.058	5.20431e+06	40.4668
377	2397				5.08132	160.987	442.713	5.20491e+06	40.4715
378	2398				5.06932	159.066	437.433	5.20551e+06	40.4761
379	2399				5.05732	157.169	432.215	5.20609e+06	40.4807
380	2400				5.04532	155.294	427.059	5.20668e+06	40.4852
381	2401				5.03332	153.442	421.965	5.20725e+06	40.4897
382	2402				5.02132	151.612	416.932	5.20782e+06	40.4941
383	2403				5.00932	149.803	411.959	5.20838e+06	40.4985
384	2404				4.99732	148.016	407.045	5.20894e+06	40.5028
385	2405				4.98532	146.251	402.189	5.20949e+06	40.5071
386	2406				4.97332	144.506	397.392	5.21003e+06	40.5113
387	2407				4.96132	142.782	392.652	5.21056e+06	40.5154
388	2408				4.94932	141.079	387.968	5.21109e+06	40.5195
389	2409				4.93732	139.396	383.34	5.21162e+06	40.5236
390	2410				4.92532	137.734	378.768	5.21213e+06	40.5276
391	2411				4.91332	136.091	374.25	5.21264e+06	40.5316
392	2412				4.90132	134.467	369.785	5.21315e+06	40.5355
393	2413				4.88932	132.863	365.374	5.21364e+06	40.5394
394	2414				4.87732	131.279	361.016	5.21414e+06	40.5432
395	2415				4.86532	129.713	356.71	5.21462e+06	40.547
396	2416				4.85332	128.165	352.455	5.2151e+06	40.5507
397	2417				4.84132	126.637	348.251	5.21558e+06	40.5544
398	2418				4.82932	125.126	344.097	5.21605e+06	40.5581
399	2419				4.81732	123.634	339.992	5.21651e+06	40.5617
400	2420				4.80532	122.159	335.937	5.21697e+06	40.5652
401	2421				4.79332	120.702	331.93	5.21742e+06	40.5688
402	2422				4.78132	119.262	327.97	5.21787e+06	40.5722
403	2423				4.76932	117.839	324.058	5.21831e+06	40.5757
404	2424				4.75732	116.434	320.193	5.21875e+06	40.5791
405	2425				4.74532	115.045	316.373	5.21918e+06	40.5824
406	2426				4.73332	113.673	312.599	5.21961e+06	40.5857
407	2427				4.72132	112.317	308.871	5.22003e+06	40.589
408	2428				4.70932	110.977	305.186	5.22044e+06	40.5923
409	2429				4.69732	109.653	301.546	5.22085e+06	40.5954
410	2430				4.68532	108.345	297.949	5.22126e+06	40.5986
411	2431				4.67332	107.053	294.395	5.22166e+06	40.6017
412	2432				4.66132	105.776	290.883	5.22206e+06	40.6048
413	2433				4.64932	104.514	287.414	5.22245e+06	40.6079
414	2434				4.63732	103.267	283.985	5.22284e+06	40.6109
415	2435				4.62532	102.036	280.598	5.22322e+06	40.6138
416	2436				4.61332	100.818	277.251	5.2236e+06	40.6168
417	2437				4.60132	99.6159	273.944	5.22397e+06	40.6197
418	2438				4.58932	98.4277	270.676	5.22434e+06	40.6226
419	2439				4.57732	97.2536	267.447	5.22471e+06	40.6254
420	2440				4.56532	96.0935	264.257	5.22507e+06	40.6282
421	2441				4.55332	94.9473	261.105	5.22542e+06	40.631
422	2442				4.54132	93.8147	257.99	5.22577e+06	40.6337
423	2443				4.52932	92.6957	254.913	5.22612e+06	40.6364
424	2444				4.51732	91.59	251.872	5.22647e+06	40.6391
425	2445				4.50532	90.4975	248.868	5.2268e+06	40.6417
426	2446				4.49332	89.418	245.899	5.22714e+06	40.6443
427	2447				4.48132	88.3514	242.966	5.22747e+06	40.6469
428	2448				4.46932	87.2975	240.068	5.2278e+06	40.6494
429	2449				4.45732	86.2562	237.205	5.22812e+06	40.652
430	2450				4.44532	85.2273	234.375	5.22844e+06	40.6544
431	2451				4.43332	84.2107	231.579	5.22876e+06	40.6569
432	2452				4.42132	83.2062	228.817	5.22907e+06	40.6593
433	2453				4.40932	82.2137	226.088	5.22938e+06	40.6617
434	2454				4.39732	81.233	223.391	5.22968e+06	40.6641
435	2455				4.38532	80.264	220.726	5.22998e+06	40.6664
436	2456				4.37332	79.3066	218.093	5.23028e+06	40.6687
437	2457				4.36132	78.3606	215.492	5.23057e+06	40.671
438	2458				4.34932	77.4259	212.921	5.23087e+06	40.6733
439	2459				4.33732	76.5024	210.382	5.23115e+06	40.6755
440	2460				4.32532	75.5898	207.872	5.23144e+06	40.6777
441	2461				4.31332	74.6882	205.392	5.23172e+06	40.6799
442	2462				4.30132	73.7973	202.943	5.23199e+06	40.6821
443	2463				4.28932	72.917	200.522	5.23227e+06	40.6842
444	2464				4.27732	72.0472	198.13	5.23254e+06	40.6863
445	2465				4.26532	71.1878	195.767	5.2328e+06	40.6884
446	2466				4.25332	70.3387	193.431	5.23307e+06	40.6904
447	2467				4.24132	69.4997	191.124	5.23333e+06	40.6924
448	2468				4.22932	68.6706	188.844	5.23358e+06	40.6944
449	2469				4.21732	67.8515	186.592	5.23384e+06	40.6964
450	2470				4.20532	67.0422	184.366	5.23409e+06	40.6984
451	2471				4.19332	66.2425	182.167	5.23434e+06	40.7003
452	2472				4.18132	65.4523	179.994	5.23458e+06	40.7022
453	2473				4.16932	64.6716	177.847	5.23483e+06	40.7041
454	2474				4.15732	63.9002	175.725	5.23507e+06	40.706
455	2475				4.14532	63.1379	173.629	5.2353e+06	40.7078
456	2476				4.13332	62.3848	171.558	5.23554e+06	40.7096
457	2477				4.12132	61.6407	169.512	5.23577e+06	40.7114
458	2478				4.10932	60.9054	167.49	5.236e+06	40.7132
459	2479				4.09732	60.1789	165.492	5.23622e+06	40.7149
460	2480				4.08532	59.4611	163.518	5.23645e+06	40.7167
461	2481				4.07332	58.7518	161.567	5.23667e+06	40.7184
462	2482				4.06132	58.051	159.64	5.23688e+06	40.7201
463	2483				4.04932	57.3585	157.736	5.2371e+06	40.7218
464	2484				4.03732	56.6744	155.854	5.23731e+06	40.7234
465	2485				4.02532	55.9983	153.995	5.23752e+06	40.725
466	2486				4.01332	55.3304	152.158	5.23773e+06	40.7267
467	2487				4.00132	54.6704	150.344	5.23793e+06	40.7283
468	2488				3.98932	54.0182	148.55	5.23814e+06	40.7298
469	2489				3.97732	53.3739	146.778	5.23834e+06	40.7314
470	2490				3.96532	52.7372	145.027	5.23853e+06	40.7329
471	2491				3.95332	52.1082	143.297	5.23873e+06	40.7344
472	2492				3.94132	51.4866	141.588	5.23892e+06	40.7359
473	2493				3.92932	50.8725	139.899	5.23911e+06	40.7374
474	2494				3.91732	50.2656	138.231	5.2393e+06	40.7389
475	2495				3.90532	49.6661	136.582	5.23949e+06	40.7403
476	2496				3.89332	49.0736	134.952	5.23967e+06	40.7418
477	2497				3.88132	48.4883	133.343	5.23985e+06	40.7432
478	2498				3.86932	47.9099	131.752	5.24003e+06	40.7446
479	2499				3.85732	47.3384	130.181	5.24021e+06	40.746
480	2500				3.84532	46.7737	128.628	5.24039e+06	40.7473
481	2501				3.83332	46.2158	127.093	5.24056e+06	40.7487
482	2502				3.82132	45.6645	125.577	5.24073e+06	40.75
483	2503				3.80932	45.1198	124.08	5.2409e+06	40.7513
484	2504				3.79732	44.5816	122.599	5.24107e+06	40.7526
485	2505				3.78532	44.0498	121.137	5.24123e+06	40.7539
486	2506				3.77332	43.5244	119.692	5.2414e+06	40.7552
487	2507				3.76132	43.0052	118.264	5.24156e+06	40.7564
488	2508				3.74932	42.4923	116.854	5.24172e+06	40.7577
489	2509				3.73732	41.9854	115.46	5.24187e+06	40.7589
490	2510				3.72532	41.4846	114.083	5.24203e+06	40.7601
491	2511				3.71332	40.9897	112.722	5.24218e+06	40.7613
492	2512				3.70132	40.5008	111.377	5.24234e+06	40.7625
493	2513				3.68932	40.0177	110.049	5.24249e+06	40.7636
494	2514				3.67732	39.5404	108.736	5.24263e+06	40.7648
495	2515				3.66532	39.0687	107.439	5.24278e+06	40.7659
496	2516				3.65332	38.6027	106.157	5.24292e+06	40.7671
497	2517				3.64132	38.1422	104.891	5.24307e+06	40.7682
498	2518				3.62932	37.6872	103.64	5.24321e+06	40.7693
499	2519				3.61732	37.2377	102.404	5.24335e+06	40.7704
500	2520				3.60532	36.7935	101.182	5.24349e+06	40.7714
501	2521				3.59332	36.3546	99.9753	5.24362e+06	40.7725
502	2522				3.58132	35.921	98.7827	5.24376e+06	40.7735
503	2523				3.56932	35.4925	97.6044	5.24389e+06	40.7746
504	2524				3.55732	35.0691	96.4402	5.24402e+06	40.7756
505	2525				3.54532	34.6508	95.2898	5.24415e+06	40.7766
506	2526				3.53332	34.2375	94.1531	5.24428e+06	40.7776
507	2527				3.52132	33.8291	93.0301	5.24441e+06	40.7786
508	2528				3.50932	33.4256	91.9204	5.24453e+06	40.7796
509	2529				3.49732	33.0269	90.8239	5.24466e+06	40.7805
510	2530				3.48532	32.6329	89.7405	5.24478e+06	40.7815
511	2531				3.47332	32.2437	88.6701	5.2449e+06	40.7824
512	2532				3.46132	31.8591	87.6124	5.24502e+06	40.7833
513	2533				3.44932	31.479	86.5673	5.24514e+06	40.7843
514	2534				3.43732	31.1035	85.5347	5.24525e+06	40.7852
515	2535				3.42532	30.7325	84.5145	5.24537e+06	40.7861
516	2536				3.41332	30.3659	83.5064	5.24548e+06	40.787
517	2537				3.40132	30.0037	82.5103	5.2456e+06	40.7878
518	2538				3.38932	29.6458	81.5261	5.24571e+06	40.7887
519	2539				3.37732	29.2922	80.5536	5.24582e+06	40.7895
520	2540				3.36532	28.9428	79.5927	5.24593e+06	40.7904
521	2541				3.35332	28.5976	78.6433	5.24603e+06	40.7912
522	2542				3.34132	28.2565	77.7052	5.24614e+06	40.792
523	2543				3.32932	27.9194	76.7783	5.24624e+06	40.7929
524	2544				3.31732	27.5864	75.8625	5.24635e+06	40.7937
525	2545				3.30532	27.2573	74.9576	5.24645e+06	40.7945
526	2546				3.29332	26.9322	74.0635	5.24655e+06	40.7952
527	2547				3.28132	26.6109	73.18	5.24665e+06	40.796
528	2548				3.26932	26.2935	72.3071	5.24675e+06	40.7968
529	2549				3.25732	25.9799	71.4446	5.24685e+06	40.7975
530	2550				3.24532	25.67	70.5924	5.24694e+06	40.7983
531	2551				3.23332	25.3638	69.7504	5.24704e+06	40.799
532	2552				3.22132	25.0612	68.9184	5.24713e+06	40.7998
533	2553				3.20932	24.7623	68.0963	5.24722e+06	40.8005
534	2554				3.19732	24.4669	67.284	5.24732e+06	40.8012
535	2555				3.18532	24.1751	66.4814	5.24741e+06	40.8019
536	2556				3.17332	23.8867	65.6884	5.2475e+06	40.8026
537	2557				3.16132	23.6018	64.9049	5.24758e+06	40.8033
538	2558				3.14932	23.3202	64.1307	5.24767e+06	40.804
539	2559				3.13732	23.0421	63.3657	5.24776e+06	40.8046
540	2560				3.12532	22.7672	62.6099	5.24784e+06	40.8053
541	2561				3.11332	22.4956	61.863	5.24793e+06	40.806
542	2562				3.10132	22.2273	61.1251	5.24801e+06	40.8066
543	2563				3.08932	21.9622	60.396	5.24809e+06	40.8073
544	2564				3.07732	21.7002	59.6756	5.24818e+06	40.8079
545	2565				3.06532	21.4414	58.9637	5.24826e+06	40.8085
546	2566				3.05332	21.1856	58.2604	5.24834e+06	40.8091
547	2567				3.04132	20.9329	57.5655	5.24841e+06	40.8097
548	2568				3.02932	20.6832	56.8788	5.24849e+06	40.8103
549	2569				3.01732	20.4365	56.2003	5.24857e+06	40.8109
550	2570				3.00532	20.1927	55.53	5.24864e+06	40.8115
551	2571				2.99332	19.9518	54.8676	5.24872e+06	40.8121
552	2572				2.98132	19.7139	54.2131	5.24879e+06	40.8127
553	2573				2.96932	19.4787	53.5664	5.24887e+06	40.8133
554	2574				2.95732	19.2464	52.9275	5.24894e+06	40.8138
555	2575				2.94532	19.0168	52.2961	5.24901e+06	40.8144
556	2576				2.93332	18.7899	51.6723	5.24908e+06	40.8149
557	2577				2.92132	18.5658	51.056	5.24915e+06	40.8155
558	2578				2.90932	18.3444	50.447	5.24922e+06	40.816
559	2579				2.89732	18.1255	49.8452	5.24929e+06	40.8165
560	2580				2.88532	17.9093	49.2507	5.24935e+06	40.817
561	2581				2.87332	17.6957	48.6632	5.24942e+06	40.8176
562	2582				2.86132	17.4846	48.0827	5.24948e+06	40.8181
563	2583				2.84932	17.2761	47.5092	5.24955e+06	40.8186
564	2584				2.83732	17.07	46.9425	5.24961e+06	40.8191
565	2585				2.82532	16.8664	46.3825	5.24968e+06	40.8196
566	2586				2.81332	16.6652	45.8293	5.24974e+06	40.82
567	2587				2.80132	16.4664	45.2826	5.2498e+06	40.8205
568	2588				2.78932	16.27	44.7424	5.24986e+06	40.821
569	2589				2.77732	16.0759	44.2087	5.24992e+06	40.8215
570	2590				2.76532	15.8842	43.6814	5.24998e+06	40.8219
571	2591				2.75332	15.6947	43.1604	5.25004e+06	40.8224
572	2592				2.74132	15.5075	42.6455	5.2501e+06	40.8228
573	2593				2.72932	15.3225	42.1369	5.25016e+06	40.8233
574	2594				2.71732	15.1397	41.6342	5.25021e+06	40.8237
575	2595				2.70532	14.9591	41.1376	5.25027e+06	40.8242
576	2596				2.69332	14.7807	40.6469	5.25032e+06	40.8246
577	2597				2.68132	14.6044	40.1621	5.25038e+06	40.825
578	2598				2.66932	14.4302	39.683	5.25043e+06	40.8254
579	2599				2.65732	14.2581	39.2096	5.25049e+06	40.8259
580	2600				2.64532	14.088	38.7419	5.25054e+06	40.8263
581	2601				2.63332	13.9199	38.2798	5.25059e+06	40.8267
582	2602				2.62132	13.7539	37.8232	5.25064e+06	40.8271
583	2603				2.60932	13.5898	37.372	5.25069e+06	40.8275
584	2604				2.59732	13.4277	36.9263	5.25074e+06	40.8279
585	2605				2.58532	13.2676	36.4858	5.25079e+06	40.8283
586	2606				2.57332	13.1093	36.0506	5.25084e+06	40.8286
587	2607				2.56132	12.9529	35.6205	5.25089e+06	40.829
588	2608				2.54932	12.7984	35.1957	5.25094e+06	40.8294
589	2609				2.53732	12.6458	34.7758	5.25099e+06	40.8298
590	2610				2.52532	12.4949	34.361	5.25103e+06	40.8301
591	2611				2.51332	12.3459	33.9511	5.25108e+06	40.8305
592	2612				2.50132	12.1986	33.5462	5.25113e+06	40.8308
593	2613				2.48932	12.0531	33.146	5.25117e+06	40.8312
594	2614				2.47732	11.9093	32.7506	5.25122e+06	40.8315
595	2615				2.46532	11.7673	32.36	5.25126e+06	40.8319
596	2616				2.45332	11.6269	31.974	5.2513e+06	40.8322
597	2617				2.44132	11.4882	31.5926	5.25135e+06	40.8326
598	2618				2.42932	11.3512	31.2157	5.25139e+06	40.8329
599	2619				2.41732	11.2158	30.8434	5.25143e+06	40.8332
600	2620				2.40532	11.082	30.4755	5.25147e+06	40.8335
601	2621				2.39332	10.9498	30.112	5.25151e+06	40.8339
602	2622				2.38132	10.8192	29.7528	5.25156e+06	40.8342
603	2623				2.36932	10.6901	29.3979	5.2516e+06	40.8345
604	2624				2.35732	10.5626	29.0472	5.25163e+06	40.8348
605	2625				2.34532	10.4366	28.7007	5.25167e+06	40.8351
606	2626				2.33332	10.3121	28.3584	5.25171e+06	40.8354
607	2627				2.32132	10.1891	28.0201	5.25175e+06	40.8357
608	2628				2.30932	10.0676	27.6859	5.25179e+06	40.836
609	2629				2.29732	9.94751	27.3556	5.25183e+06	40.8363
610	2630				2.28532	9.82885	27.0293	5.25186e+06	40.8366
611	2631				2.27332	9.71161	26.7069	5.2519e+06	40.8368
612	2632				2.26132	9.59576	26.3884	5.25194e+06	40.8371
613	2633				2.24932	9.4813	26.0736	5.25197e+06	40.8374
614	2634				2.23732	9.36821	25.7626	5.25201e+06	40.8377
615	2635				2.22532	9.25646	25.4553	5.25204e+06	40.8379
616	2636				2.21332	9.14605	25.1516	5.25207e+06	40.8382
617	2637				2.20132	9.03695	24.8516	5.25211e+06	40.8385
618	2638				2.18932	8.92916	24.5552	5.25214e+06	40.8387
619	2639				2.17732	8.82265	24.2623	5.25218e+06	40.839
620	2640				2.16532	8.71741	23.9729	5.25221e+06	40.8392
621	2641				2.15332	8.61342	23.6869	5.25224e+06	40.8395
622	2642				2.14132	8.51068	23.4044	5.25227e+06	40.8397
623	2643				2.12932	8.40916	23.1252	5.2523e+06	40.84
624	2644				2.11732	8.30885	22.8494	5.25234e+06	40.8402
625	2645				2.10532	8.20974	22.5768	5.25237e+06	40.8405
626	2646				2.09332	8.11182	22.3075	5.2524e+06	40.8407
627	2647				2.08132	8.01506	22.0414	5.25243e+06	40.8409
628	2648				2.06932	7.91945	21.7785	5.25246e+06	40.8412
629	2649				2.05732	7.82498	21.5187	5.25249e+06	40.8414
630	2650				2.04532	7.73165	21.262	5.25251e+06	40.8416
631	2651				2.03332	7.63942	21.0084	5.25254e+06	40.8418
632	2652				2.02132	7.5483	20.7578	5.25257e+06	40.8421
633	2653				2.00932	7.45826	20.5102	5.2526e+06	40.8423
634	2654				1.99732	7.36929	20.2656	5.25263e+06	40.8425
635	2655				1.98532	7.28139	20.0238	5.25265e+06	40.8427
636	2656				1.97332	7.19454	19.785	5.25268e+06	40.8429
637	2657				1.96132	7.10872	19.549	5.25271e+06	40.8431
638	2658				1.94932	7.02392	19.3158	5.25273e+06	40.8433
639	2659				1.93732	6.94014	19.0854	5.25276e+06	40.8435
640	2660				1.92532	6.85735	18.8577	5.25279e+06	40.8437
641	2661				1.91332	6.77556	18.6328	5.25281e+06	40.8439
642	2662				1.90132	6.69474	18.4105	5.25284e+06	40.8441
643	2663				1.88932	6.61488	18.1909	5.25286e+06	40.8443
644	2664				1.87732	6.53598	17.9739	5.25289e+06	40.8445
645	2665				1.86532	6.45801	17.7595	5.25291e+06	40.8447
646	2666				1.85332	6.38098	17.5477	5.25293e+06	40.8449
647	2667				1.84132	6.30487	17.3384	5.25296e+06	40.8451
648	2668				1.82932	6.22966	17.1316	5.25298e+06	40.8453
649	2669				1.81732	6.15535	16.9272	5.253e+06	40.8454
650	2670				1.80532	6.08193	16.7253	5.25303e+06	40.8456
651	2671				1.79332	6.00938	16.5258	5.25305e+06	40.8458
652	2672				1.78132	5.9377	16.3287	5.25307e+06	40.846
653	2673				1.76932	5.86687	16.1339	5.25309e+06	40.8461
654	2674				1.75732	5.79689	15.9415	5.25312e+06	40.8463
655	2675				1.74532	5.72774	15.7513	5.25314e+06	40.8465
656	2676				1.73332	5.65942	15.5634	5.25316e+06	40.8466
657	2677				1.72132	5.59191	15.3778	5.25318e+06	40.8468
658	2678				1.70932	5.52521	15.1943	5.2532e+06	40.847
659	2679				1.69732	5.45931	15.0131	5.25322e+06	40.8471
660	2680				1.68532	5.39419	14.834	5.25324e+06	40.8473
661	2681				1.67332	5.32984	14.6571	5.25326e+06	40.8474
662	2682				1.66132	5.26627	14.4822	5.25328e+06	40.8476
663	2683				1.64932	5.20345	14.3095	5.2533e+06	40.8477
664	2684				1.63732	5.14138	14.1388	5.25332e+06	40.8479
665	2685				1.62532	5.08005	13.9701	5.25334e+06	40.848
666	2686				1.61332	5.01946	13.8035	5.25336e+06	40.8482
667	2687				1.60132	4.95958	13.6389	5.25338e+06	40.8483
668	2688				1.58932	4.90042	13.4762	5.25339e+06	40.8485
669	2689				1.57732	4.84197	13.3154	5.25341e+06	40.8486
670	2690				1.56532	4.78421	13.1566	5.25343e+06	40.8487
671	2691				1.55332	4.72715	12.9997	5.25345e+06	40.8489
672	2692				1.54132	4.67076	12.8446	5.25347e+06	40.849
673	2693				1.52932	4.61505	12.6914	5.25348e+06	40.8492
674	2694				1.51732	4.56	12.54	5.2535e+06	40.8493
675	2695				1.50532	4.5056	12.3904	5.25352e+06	40.8494
676	2696				1.49332	4.45186	12.2426	5.25353e+06	40.8495
677	2697				1.48132	4.39876	12.0966	5.25355e+06	40.8497
678	2698				1.46932	4.34629	11.9523	5.25357e+06	40.8498
679	2699				1.45732	4.29444	11.8097	5.25358e+06	40.8499
680	2700				1.44532	4.24322	11.6688	5.2536e+06	40.85
681	2701				1.43332	4.1926	11.5297	5.25361e+06	40.8502
682	2702				1.42132	4.14259	11.3921	5.25363e+06	40.8503
683	2703				1.40932	4.09318	11.2562	5.25364e+06	40.8504
684	2704				1.39732	4.04435	11.122	5.25366e+06	40.8505
685	2705				1.38532	3.99611	10.9893	5.25367e+06	40.8506
686	2706				1.37332	3.94844	10.8582	5.25369e+06	40.8508
687	2707				1.36132	3.90135	10.7287	5.2537e+06	40.8509
688	2708				1.34932	3.85481	10.6007	5.25372e+06	40.851
689	2709				1.33732	3.80883	10.4743	5.25373e+06	40.8511
690	2710				1.32532	3.7634	10.3493	5.25375e+06	40.8512
691	2711				1.31332	3.71851	10.2259	5.25376e+06	40.8513
692	2712				1.30132	3.67415	10.1039	5.25377e+06	40.8514
693	2713				1.28932	3.63032	9.98339	5.25379e+06	40.8515
694	2714				1.27732	3.58702	9.86431	5.2538e+06	40.8516
695	2715				1.26532	3.54423	9.74664	5.25382e+06	40.8517
696	2716				1.25332	3.50196	9.63038	5.25383e+06	40.8518
697	2717				1.24132	3.46018	9.51551	5.25384e+06	40.8519
698	2718				1.22932	3.41891	9.402	5.25385e+06	40.852
699	2719				1.21732	3.37813	9.28985	5.25387e+06	40.8521
700	2720				1.20532	3.33783	9.17904	5.25388e+06	40.8522

## Sheet: Switchgrass Fit k=0.05 default
SUMMARY OUTPUT
Regression Statistics
Multiple R	1
R Square	1
Adjusted R Square	1
Standard Error	5.41227e-16
Observations	107
ANOVA
	df	SS	MS	F	Significance F
Regression	1	255.195	255.195	8.71189e+32	0
Residual	105	3.07574e-29	2.92927e-31
Total	106	255.195
	Coefficients	Standard Error	t Stat	P-value	Lower 95%	Upper 95%	Lower 95.0%	Upper 95.0%
Intercept	112.132	3.51375e-15	3.19123e+16	0	112.132	112.132	112.132	112.132
X Variable 1	-0.05	1.694e-18	-2.95159e+16	0	-0.05	-0.05	-0.05	-0.05
RESIDUAL OUTPUT
Observation	Predicted Y	Residuals
1	11.0819	5.32907e-15
2	11.0319	3.55271e-15
3	10.9819	0
4	10.9319	-3.55271e-15
5	10.8819	-5.32907e-15
6	10.8319	5.32907e-15
7	10.7819	3.55271e-15
8	10.7319	0
9	10.6819	-3.55271e-15
10	10.6319	-5.32907e-15
11	10.5819	5.32907e-15
12	10.5319	3.55271e-15
13	10.4819	0
14	10.4319	-3.55271e-15
15	10.3819	-5.32907e-15
16	10.3319	5.32907e-15
17	10.2819	3.55271e-15
18	10.2319	0
19	10.1819	-3.55271e-15
20	10.1319	-5.32907e-15
21	10.0819	5.32907e-15
22	10.0319	3.55271e-15
23	9.98186	0
24	9.93186	-3.55271e-15
25	9.88186	-5.32907e-15
26	9.83186	5.32907e-15
27	9.78186	3.55271e-15
28	9.73186	0
29	9.68186	-3.55271e-15
30	9.63186	-5.32907e-15
31	9.58186	5.32907e-15
32	9.53186	3.55271e-15
33	9.48186	0
34	9.43186	-3.55271e-15
35	9.38186	-5.32907e-15
36	9.33186	5.32907e-15
37	9.28186	3.55271e-15
38	9.23186	0
39	9.18186	-3.55271e-15
40	9.13186	-5.32907e-15
41	9.08186	5.32907e-15
42	9.03186	3.55271e-15
43	8.98186	0
44	8.93186	-3.55271e-15
45	8.88186	-5.32907e-15
46	8.83186	5.32907e-15
47	8.78186	3.55271e-15
48	8.73186	0
49	8.68186	-3.55271e-15
50	8.63186	-5.32907e-15
51	8.58186	5.32907e-15
52	8.53186	3.55271e-15
53	8.48186	0
54	8.43186	-3.55271e-15
55	8.38186	-5.32907e-15
56	8.33186	5.32907e-15
57	8.28186	3.55271e-15
58	8.23186	0
59	8.18186	-3.55271e-15
60	8.13186	-5.32907e-15
61	8.08186	5.32907e-15
62	8.03186	3.55271e-15
63	7.98186	0
64	7.93186	-2.66454e-15
65	7.88186	-5.32907e-15
66	7.83186	5.32907e-15
67	7.78186	2.66454e-15
68	7.73186	0
69	7.68186	-2.66454e-15
70	7.63186	-6.21725e-15
71	7.58186	5.32907e-15
72	7.53186	2.66454e-15
73	7.48186	0
74	7.43186	-2.66454e-15
75	7.38186	-6.21725e-15
76	7.33186	5.32907e-15
77	7.28186	2.66454e-15
78	7.23186	0
79	7.18186	-2.66454e-15
80	7.13186	-6.21725e-15
81	7.08186	5.32907e-15
82	7.03186	2.66454e-15
83	6.98186	0
84	6.93186	-2.66454e-15
85	6.88186	-5.32907e-15
86	6.83186	5.32907e-15
87	6.78186	2.66454e-15
88	6.73186	0
89	6.68186	-3.55271e-15
90	6.63186	-6.21725e-15
91	6.58186	5.32907e-15
92	6.53186	2.66454e-15
93	6.48186	0
94	6.43186	-2.66454e-15
95	6.38186	-6.21725e-15
96	6.33186	5.32907e-15
97	6.28186	2.66454e-15
98	6.23186	0
99	6.18186	-2.66454e-15
100	6.13186	-6.21725e-15
101	6.08186	5.32907e-15
102	6.03186	2.66454e-15
103	5.98186	0
104	5.93186	-2.66454e-15
105	5.88186	-6.21725e-15
106	5.83186	5.32907e-15
107	5.78186	2.66454e-15

## Sheet: Switchgrass L0=140 k=0.05
Total Waste in Place		23172413	tonnes
Total Degradable Waste		23172413	tonnes
Location		United States
Default Lo		140	m3/Mg
Default LandGem Model k		0.05
Years Since Landfill Closure	Year	CH4 emissions LandGEM (tonnes/yr)	CO2 emissions LandGEM (tonnes)	LandGem Ln(CH4)	Model Predicted Ln(CH4)	From Fit CH4 emissions LandGEM (tonnes/yr)	From Fit CO2 emissions LandGEM (tonnes/yr)	Cumulative Waste Decomposed (tonnes)	Percentage of Degradable Waste Placed That has Decomposed	Percentage of Total Waste Placed That has Decomposed
-33	1987	0	0			0	0	0	0
-32	1988	854.522	2349.93			854.522	2349.93	3204.46	0.0138288
-31	1989	1728.86	4754.36			1728.86	4754.36	9687.67	0.0418069
-30	1990	2626.47	7222.79			2626.47	7222.79	19536.9	0.0843112
-29	1991	3550.97	9765.17			3550.97	9765.17	32853.1	0.141777
-28	1992	4506.12	12391.8			4506.12	12391.8	49751	0.214699
-27	1993	5495.89	15113.7			5495.89	15113.7	70360.6	0.30364
-26	1994	6524.43	17942.2			6524.43	17942.2	94827.2	0.409225
-25	1995	7596.11	20889.3			7596.11	20889.3	123313	0.532153
-24	1996	8715.54	23967.7			8715.54	23967.7	155996	0.673196
-23	1997	9887.59	27190.9			9887.59	27190.9	193074	0.833208
-22	1998	11066.2	30432			11066.2	30432	234573	1.01229
-21	1999	12251.6	33691.9			12251.6	33691.9	280516	1.21056
-20	2000	13347	36704.3			13347	36704.3	330567	1.42656
-19	2001	14467	39784.3			14467	39784.3	384819	1.66068
-18	2002	15975.4	43932.3			15975.4	43932.3	444726	1.91921
-17	2003	17504	48136.1			17504	48136.1	510366	2.20247
-16	2004	19384.4	53307			19384.4	53307	583058	2.51617
-15	2005	21324.5	58642.3			21324.5	58642.3	663025	2.86127
-14	2006	23647.4	65030.3			23647.4	65030.3	751702	3.24395
-13	2007	26175.9	71983.7			26175.9	71983.7	849862	3.66756
-12	2008	28947.1	79604.4			28947.1	79604.4	958413	4.13601
-11	2009	32227.7	88626.3			32227.7	88626.3	1.07927e+06	4.65755
-10	2010	34994.3	96234.2			34994.3	96234.2	1.2105e+06	5.22387
-9	2011	37711.6	103707			37711.6	103707	1.35191e+06	5.83415
-8	2012	39824.6	109518			39824.6	109518	1.50126e+06	6.47864
-7	2013	42174	115979			42174	115979	1.65941e+06	7.16114
-6	2014	46548.4	128008			46548.4	128008	1.83397e+06	7.91444
-5	2015	49756.9	136831			49756.9	136831	2.02055e+06	8.71965
-4	2016	52683.3	144879			52683.3	144879	2.21812e+06	9.57223
-3	2017	55078.2	151465			55078.2	151465	2.42466e+06	10.4636
-2	2018	58946.1	162102			58946.1	162102	2.64571e+06	11.4175
-1	2019	63513.7	174663			63513.7	174663	2.88388e+06	12.4453
0	2020	68313	187861			68313	187861	3.14006e+06	13.5508
1	2021	64981.3		11.0819	11.0819	64981.3	178699	3.38374e+06	14.6024
2	2022	61812.1		11.0319	11.0319	61812.1	169983	3.61553e+06	15.6027
3	2023	58797.5		10.9819	10.9819	58797.5	161693	3.83602e+06	16.5543
4	2024	55929.9		10.9319	10.9319	55929.9	153807	4.04576e+06	17.4594
5	2025	53202.2		10.8819	10.8819	53202.2	146306	4.24527e+06	18.3204
6	2026	50607.5		10.8319	10.8319	50607.5	139171	4.43505e+06	19.1393
7	2027	48139.3		10.7819	10.7819	48139.3	132383	4.61557e+06	19.9184
8	2028	45791.6		10.7319	10.7319	45791.6	125927	4.78729e+06	20.6594
9	2029	43558.3		10.6819	10.6819	43558.3	119785	4.95063e+06	21.3643
10	2030	41433.9		10.6319	10.6319	41433.9	113943	5.10601e+06	22.0349
11	2031	39413.2		10.5819	10.5819	39413.2	108386	5.25381e+06	22.6727
12	2032	37491		10.5319	10.5319	37491	103100	5.3944e+06	23.2794
13	2033	35662.5		10.4819	10.4819	35662.5	98071.9	5.52813e+06	23.8565
14	2034	33923.2		10.4319	10.4319	33923.2	93288.9	5.65535e+06	24.4055
15	2035	32268.8		10.3819	10.3819	32268.8	88739.1	5.77635e+06	24.9277
16	2036	30695		10.3319	10.3319	30695	84411.3	5.89146e+06	25.4245
17	2037	29198		10.2819	10.2819	29198	80294.5	6.00095e+06	25.897
18	2038	27774		10.2319	10.2319	27774	76378.5	6.10511e+06	26.3464
19	2039	26419.4		10.1819	10.1819	26419.4	72653.4	6.20418e+06	26.774
20	2040	25130.9		10.1319	10.1319	25130.9	69110.1	6.29842e+06	27.1807
21	2041	23905.3		10.0819	10.0819	23905.3	65739.6	6.38806e+06	27.5675
22	2042	22739.4		10.0319	10.0319	22739.4	62533.4	6.47334e+06	27.9355
23	2043	21630.4		9.98186	9.98186	21630.4	59483.6	6.55445e+06	28.2856
24	2044	20575.5		9.93186	9.93186	20575.5	56582.6	6.63161e+06	28.6186
25	2045	19572		9.88186	9.88186	19572	53823	6.705e+06	28.9353
26	2046	18617.5		9.83186	9.83186	18617.5	51198	6.77482e+06	29.2366
27	2047	17709.5		9.78186	9.78186	17709.5	48701.1	6.84123e+06	29.5232
28	2048	16845.8		9.73186	9.73186	16845.8	46325.9	6.9044e+06	29.7958
29	2049	16024.2		9.68186	9.68186	16024.2	44066.5	6.96449e+06	30.0551
30	2050	15242.7		9.63186	9.63186	15242.7	41917.4	7.02165e+06	30.3018
31	2051	14499.3		9.58186	9.58186	14499.3	39873.1	7.07602e+06	30.5364
32	2052	13792.2		9.53186	9.53186	13792.2	37928.4	7.12775e+06	30.7596
33	2053	13119.5		9.48186	9.48186	13119.5	36078.6	7.17694e+06	30.9719
34	2054	12479.7		9.43186	9.43186	12479.7	34319.1	7.22374e+06	31.1739
35	2055	11871		9.38186	9.38186	11871	32645.3	7.26826e+06	31.366
36	2056	11292.1		9.33186	9.33186	11292.1	31053.2	7.3106e+06	31.5487
37	2057	10741.3		9.28186	9.28186	10741.3	29538.7	7.35088e+06	31.7226
38	2058	10217.5		9.23186	9.23186	10217.5	28098.1	7.3892e+06	31.8879
39	2059	9719.17		9.18186	9.18186	9719.17	26727.7	7.42565e+06	32.0452
40	2060	9245.16		9.13186	9.13186	9245.16	25424.2	7.46032e+06	32.1948
41	2061	8794.27		9.08186	9.08186	8794.27	24184.2	7.49329e+06	32.3371
42	2062	8365.36		9.03186	9.03186	8365.36	23004.8	7.52466e+06	32.4725
43	2063	7957.38		8.98186	8.98186	7957.38	21882.8	7.5545e+06	32.6013
44	2064	7569.29		8.93186	8.93186	7569.29	20815.6	7.58289e+06	32.7238
45	2065	7200.14		8.88186	8.88186	7200.14	19800.4	7.60989e+06	32.8403
46	2066	6848.98		8.83186	8.83186	6848.98	18834.7	7.63557e+06	32.9511
47	2067	6514.95		8.78186	8.78186	6514.95	17916.1	7.66e+06	33.0566
48	2068	6197.21		8.73186	8.73186	6197.21	17042.3	7.68324e+06	33.1569
49	2069	5894.97		8.68186	8.68186	5894.97	16211.2	7.70535e+06	33.2523
50	2070	5607.47		8.63186	8.63186	5607.47	15420.5	7.72638e+06	33.343
51	2071	5333.99		8.58186	8.58186	5333.99	14668.5	7.74638e+06	33.4293
52	2072	5073.85		8.53186	8.53186	5073.85	13953.1	7.76541e+06	33.5114
53	2073	4826.4		8.48186	8.48186	4826.4	13272.6	7.78351e+06	33.5895
54	2074	4591.01		8.43186	8.43186	4591.01	12625.3	7.80072e+06	33.6638
55	2075	4367.1		8.38186	8.38186	4367.1	12009.5	7.8171e+06	33.7345
56	2076	4154.12		8.33186	8.33186	4154.12	11423.8	7.83268e+06	33.8017
57	2077	3951.52		8.28186	8.28186	3951.52	10866.7	7.8475e+06	33.8657
58	2078	3758.8		8.23186	8.23186	3758.8	10336.7	7.86159e+06	33.9265
59	2079	3575.48		8.18186	8.18186	3575.48	9832.57	7.875e+06	33.9844
60	2080	3401.1		8.13186	8.13186	3401.1	9353.03	7.88775e+06	34.0394
61	2081	3235.23		8.08186	8.08186	3235.23	8896.88	7.89989e+06	34.0918
62	2082	3077.45		8.03186	8.03186	3077.45	8462.98	7.91143e+06	34.1416
63	2083	2927.36		7.98186	7.98186	2927.36	8050.23	7.9224e+06	34.1889
64	2084	2784.59		7.93186	7.93186	2784.59	7657.62	7.93285e+06	34.234
65	2085	2648.78		7.88186	7.88186	2648.78	7284.15	7.94278e+06	34.2769
66	2086	2519.6		7.83186	7.83186	2519.6	6928.9	7.95223e+06	34.3176
67	2087	2396.72		7.78186	7.78186	2396.72	6590.97	7.96121e+06	34.3564
68	2088	2279.83		7.73186	7.73186	2279.83	6269.53	7.96976e+06	34.3933
69	2089	2168.64		7.68186	7.68186	2168.64	5963.76	7.9779e+06	34.4284
70	2090	2062.87		7.63186	7.63186	2062.87	5672.9	7.98563e+06	34.4618
71	2091	1962.27		7.58186	7.58186	1962.27	5396.23	7.99299e+06	34.4936
72	2092	1866.57		7.53186	7.53186	1866.57	5133.05	7.99999e+06	34.5238
73	2093	1775.53		7.48186	7.48186	1775.53	4882.71	8.00665e+06	34.5525
74	2094	1688.94		7.43186	7.43186	1688.94	4644.58	8.01298e+06	34.5798
75	2095	1606.57		7.38186	7.38186	1606.57	4418.06	8.01901e+06	34.6058
76	2096	1528.21		7.33186	7.33186	1528.21	4202.59	8.02474e+06	34.6306
77	2097	1453.68		7.28186	7.28186	1453.68	3997.63	8.03019e+06	34.6541
78	2098	1382.79		7.23186	7.23186	1382.79	3802.66	8.03537e+06	34.6765
79	2099	1315.35		7.18186	7.18186	1315.35	3617.2	8.04031e+06	34.6978
80	2100	1251.2		7.13186	7.13186	1251.2	3440.79	8.045e+06	34.718
81	2101	1190.17		7.08186	7.08186	1190.17	3272.98	8.04946e+06	34.7373
82	2102	1132.13		7.03186	7.03186	1132.13	3113.35	8.05371e+06	34.7556
83	2103	1076.91		6.98186	6.98186	1076.91	2961.51	8.05775e+06	34.773
84	2104	1024.39		6.93186	6.93186	1024.39	2817.08	8.06159e+06	34.7896
85	2105	974.432		6.88186	6.88186	974.432	2679.69	8.06524e+06	34.8054
86	2106	926.909		6.83186	6.83186	926.909	2549	8.06872e+06	34.8204
87	2107	881.703		6.78186	6.78186	881.703	2424.68	8.07202e+06	34.8346
88	2108	838.702		6.73186	6.73186	838.702	2306.43	8.07517e+06	34.8482
89	2109	797.798		6.68186	6.68186	797.798	2193.94	8.07816e+06	34.8611
90	2110	758.889		6.63186	6.63186	758.889	2086.94	8.08101e+06	34.8734
91	2111	721.877		6.58186	6.58186	721.877	1985.16	8.08371e+06	34.8851
92	2112	686.671		6.53186	6.53186	686.671	1888.35	8.08629e+06	34.8962
93	2113	653.182		6.48186	6.48186	653.182	1796.25	8.08874e+06	34.9068
94	2114	621.326		6.43186	6.43186	621.326	1708.65	8.09107e+06	34.9168
95	2115	591.023		6.38186	6.38186	591.023	1625.31	8.09328e+06	34.9264
96	2116	562.199		6.33186	6.33186	562.199	1546.05	8.09539e+06	34.9355
97	2117	534.78		6.28186	6.28186	534.78	1470.64	8.0974e+06	34.9441
98	2118	508.698		6.23186	6.23186	508.698	1398.92	8.09931e+06	34.9524
99	2119	483.889		6.18186	6.18186	483.889	1330.69	8.10112e+06	34.9602
100	2120	460.289		6.13186	6.13186	460.289	1265.8	8.10285e+06	34.9676
101	2121	437.841		6.08186	6.08186	437.841	1204.06	8.10449e+06	34.9747
102	2122	416.487		6.03186	6.03186	416.487	1145.34	8.10605e+06	34.9815
103	2123	396.175		5.98186	5.98186	396.175	1089.48	8.10754e+06	34.9879
104	2124	376.853		5.93186	5.93186	376.853	1036.35	8.10895e+06	34.994
105	2125	358.474		5.88186	5.88186	358.474	985.803	8.11029e+06	34.9998
106	2126	340.991		5.83186	5.83186	340.991	937.724	8.11157e+06	35.0053
107	2127	324.36		5.78186	5.78186	324.36	891.991	8.11279e+06	35.0105
108	2128				5.73186	308.541	848.488	8.11395e+06	35.0155
109	2129				5.68186	293.493	807.107	8.11505e+06	35.0203
110	2130				5.63186	279.18	767.744	8.11609e+06	35.0248
111	2131				5.58186	265.564	730.301	8.11709e+06	35.0291
112	2132				5.53186	252.612	694.683	8.11804e+06	35.0332
113	2133				5.48186	240.292	660.803	8.11894e+06	35.0371
114	2134				5.43186	228.573	628.575	8.11979e+06	35.0408
115	2135				5.38186	217.425	597.919	8.12061e+06	35.0443
116	2136				5.33186	206.821	568.759	8.12139e+06	35.0476
117	2137				5.28186	196.735	541.02	8.12212e+06	35.0508
118	2138				5.23186	187.14	514.634	8.12282e+06	35.0539
119	2139				5.18186	178.013	489.535	8.12349e+06	35.0567
120	2140				5.13186	169.331	465.66	8.12413e+06	35.0595
121	2141				5.08186	161.073	442.95	8.12473e+06	35.0621
122	2142				5.03186	153.217	421.347	8.12531e+06	35.0646
123	2143				4.98186	145.745	400.797	8.12585e+06	35.0669
124	2144				4.93186	138.636	381.25	8.12637e+06	35.0692
125	2145				4.88186	131.875	362.657	8.12687e+06	35.0713
126	2146				4.83186	125.443	344.97	8.12734e+06	35.0733
127	2147				4.78186	119.326	328.145	8.12778e+06	35.0753
128	2148				4.73186	113.506	312.141	8.12821e+06	35.0771
129	2149				4.68186	107.97	296.918	8.12862e+06	35.0788
130	2150				4.63186	102.704	282.437	8.129e+06	35.0805
131	2151				4.58186	97.6955	268.663	8.12937e+06	35.0821
132	2152				4.53186	92.9308	255.56	8.12972e+06	35.0836
133	2153				4.48186	88.3985	243.096	8.13005e+06	35.085
134	2154				4.43186	84.0873	231.24	8.13036e+06	35.0864
135	2155				4.38186	79.9863	219.962	8.13066e+06	35.0877
136	2156				4.33186	76.0853	209.235	8.13095e+06	35.0889
137	2157				4.28186	72.3746	199.03	8.13122e+06	35.0901
138	2158				4.23186	68.8448	189.323	8.13148e+06	35.0912
139	2159				4.18186	65.4872	180.09	8.13172e+06	35.0923
140	2160				4.13186	62.2934	171.307	8.13196e+06	35.0933
141	2161				4.08186	59.2553	162.952	8.13218e+06	35.0942
142	2162				4.03186	56.3654	155.005	8.13239e+06	35.0951
143	2163				3.98186	53.6164	147.445	8.13259e+06	35.096
144	2164				3.93186	51.0015	140.254	8.13278e+06	35.0968
145	2165				3.88186	48.5141	133.414	8.13296e+06	35.0976
146	2166				3.83186	46.1481	126.907	8.13314e+06	35.0984
147	2167				3.78186	43.8974	120.718	8.1333e+06	35.0991
148	2168				3.73186	41.7565	114.83	8.13346e+06	35.0997
149	2169				3.68186	39.72	109.23	8.13361e+06	35.1004
150	2170				3.63186	37.7828	103.903	8.13375e+06	35.101
151	2171				3.58186	35.9402	98.8354	8.13388e+06	35.1016
152	2172				3.53186	34.1873	94.0152	8.13401e+06	35.1021
153	2173				3.48186	32.52	89.43	8.13413e+06	35.1027
154	2174				3.43186	30.934	85.0684	8.13425e+06	35.1032
155	2175				3.38186	29.4253	80.9196	8.13436e+06	35.1036
156	2176				3.33186	27.9902	76.9731	8.13447e+06	35.1041
157	2177				3.28186	26.6251	73.2191	8.13456e+06	35.1045
158	2178				3.23186	25.3266	69.6481	8.13466e+06	35.1049
159	2179				3.18186	24.0914	66.2514	8.13475e+06	35.1053
160	2180				3.13186	22.9165	63.0203	8.13484e+06	35.1057
161	2181				3.08186	21.7988	59.9467	8.13492e+06	35.106
162	2182				3.03186	20.7357	57.0231	8.135e+06	35.1064
163	2183				2.98186	19.7244	54.242	8.13507e+06	35.1067
164	2184				2.93186	18.7624	51.5966	8.13514e+06	35.107
165	2185				2.88186	17.8474	49.0802	8.13521e+06	35.1073
166	2186				2.83186	16.9769	46.6866	8.13527e+06	35.1076
167	2187				2.78186	16.149	44.4096	8.13533e+06	35.1078
168	2188				2.73186	15.3614	42.2437	8.13539e+06	35.1081
169	2189				2.68186	14.6122	40.1835	8.13544e+06	35.1083
170	2190				2.63186	13.8995	38.2237	8.1355e+06	35.1085
171	2191				2.58186	13.2216	36.3595	8.13555e+06	35.1088
172	2192				2.53186	12.5768	34.5862	8.13559e+06	35.109
173	2193				2.48186	11.9634	32.8995	8.13564e+06	35.1092
174	2194				2.43186	11.38	31.2949	8.13568e+06	35.1093
175	2195				2.38186	10.825	29.7687	8.13572e+06	35.1095
176	2196				2.33186	10.297	28.3168	8.13576e+06	35.1097
177	2197				2.28186	9.79483	26.9358	8.1358e+06	35.1098
178	2198				2.23186	9.31714	25.6221	8.13583e+06	35.11
179	2199				2.18186	8.86273	24.3725	8.13586e+06	35.1101
180	2200				2.13186	8.43049	23.1839	8.1359e+06	35.1103
181	2201				2.08186	8.01933	22.0532	8.13593e+06	35.1104
182	2202				2.03186	7.62823	20.9776	8.13595e+06	35.1105
183	2203				1.98186	7.25619	19.9545	8.13598e+06	35.1106
184	2204				1.93186	6.9023	18.9813	8.13601e+06	35.1107
185	2205				1.88186	6.56567	18.0556	8.13603e+06	35.1109
186	2206				1.83186	6.24546	17.175	8.13606e+06	35.111
187	2207				1.78186	5.94087	16.3374	8.13608e+06	35.1111
188	2208				1.73186	5.65113	15.5406	8.1361e+06	35.1111
189	2209				1.68186	5.37552	14.7827	8.13612e+06	35.1112
190	2210				1.63186	5.11335	14.0617	8.13614e+06	35.1113
191	2211				1.58186	4.86397	13.3759	8.13616e+06	35.1114
192	2212				1.53186	4.62675	12.7236	8.13617e+06	35.1115
193	2213				1.48186	4.4011	12.103	8.13619e+06	35.1115
194	2214				1.43186	4.18646	11.5128	8.13621e+06	35.1116
195	2215				1.38186	3.98228	10.9513	8.13622e+06	35.1117
196	2216				1.33186	3.78806	10.4172	8.13624e+06	35.1117
197	2217				1.28186	3.60332	9.90913	8.13625e+06	35.1118
198	2218				1.23186	3.42758	9.42585	8.13626e+06	35.1118
199	2219				1.18186	3.26042	8.96615	8.13627e+06	35.1119
200	2220				1.13186	3.1014	8.52886	8.13629e+06	35.1119
201	2221				1.08186	2.95015	8.11291	8.1363e+06	35.112
202	2222				1.03186	2.80627	7.71723	8.13631e+06	35.112
203	2223				0.981855	2.6694	7.34086	8.13632e+06	35.1121
204	2224				0.931855	2.53922	6.98284	8.13633e+06	35.1121
205	2225				0.881855	2.41538	6.64229	8.13634e+06	35.1122
206	2226				0.831855	2.29758	6.31834	8.13634e+06	35.1122
207	2227				0.781855	2.18552	6.01019	8.13635e+06	35.1122
208	2228				0.731855	2.07893	5.71707	8.13636e+06	35.1123
209	2229				0.681855	1.97754	5.43824	8.13637e+06	35.1123
210	2230				0.631855	1.8811	5.17302	8.13637e+06	35.1123
211	2231				0.581855	1.78935	4.92073	8.13638e+06	35.1124
212	2232				0.531855	1.70209	4.68074	8.13639e+06	35.1124
213	2233				0.481855	1.61908	4.45246	8.13639e+06	35.1124
214	2234				0.431855	1.54011	4.23531	8.1364e+06	35.1124
215	2235				0.381855	1.465	4.02875	8.13641e+06	35.1125
216	2236				0.331855	1.39355	3.83227	8.13641e+06	35.1125
217	2237				0.281855	1.32559	3.64536	8.13642e+06	35.1125
218	2238				0.231855	1.26094	3.46758	8.13642e+06	35.1125
219	2239				0.181855	1.19944	3.29846	8.13642e+06	35.1125
220	2240				0.131855	1.14094	3.13759	8.13643e+06	35.1126
221	2241				0.0818552	1.0853	2.98457	8.13643e+06	35.1126
222	2242				0.0318552	1.03237	2.83901	8.13644e+06	35.1126
223	2243				-0.0181448	0.982019	2.70055	8.13644e+06	35.1126
224	2244				-0.0681448	0.934125	2.56884	8.13644e+06	35.1126
225	2245				-0.118145	0.888567	2.44356	8.13645e+06	35.1126
226	2246				-0.168145	0.845231	2.32439	8.13645e+06	35.1127
227	2247				-0.218145	0.804009	2.21102	8.13645e+06	35.1127
228	2248				-0.268145	0.764797	2.10319	8.13646e+06	35.1127
229	2249				-0.318145	0.727497	2.00062	8.13646e+06	35.1127
230	2250				-0.368145	0.692017	1.90305	8.13646e+06	35.1127
231	2251				-0.418145	0.658267	1.81023	8.13646e+06	35.1127
232	2252				-0.468145	0.626163	1.72195	8.13647e+06	35.1127
233	2253				-0.518145	0.595625	1.63797	8.13647e+06	35.1127
234	2254				-0.568145	0.566576	1.55808	8.13647e+06	35.1127
235	2255				-0.618145	0.538943	1.48209	8.13647e+06	35.1128
236	2256				-0.668145	0.512659	1.40981	8.13647e+06	35.1128
237	2257				-0.718145	0.487656	1.34105	8.13648e+06	35.1128
238	2258				-0.768145	0.463873	1.27565	8.13648e+06	35.1128
239	2259				-0.818145	0.44125	1.21344	8.13648e+06	35.1128
240	2260				-0.868145	0.41973	1.15426	8.13648e+06	35.1128
241	2261				-0.918145	0.399259	1.09796	8.13648e+06	35.1128
242	2262				-0.968145	0.379787	1.04441	8.13648e+06	35.1128
243	2263				-1.01814	0.361265	0.993477	8.13649e+06	35.1128
244	2264				-1.06814	0.343645	0.945025	8.13649e+06	35.1128
245	2265				-1.11814	0.326886	0.898936	8.13649e+06	35.1128
246	2266				-1.16814	0.310943	0.855094	8.13649e+06	35.1128
247	2267				-1.21814	0.295778	0.813391	8.13649e+06	35.1128
248	2268				-1.26814	0.281353	0.773721	8.13649e+06	35.1128
249	2269				-1.31814	0.267631	0.735986	8.13649e+06	35.1128
250	2270				-1.36814	0.254579	0.700092	8.13649e+06	35.1128
251	2271				-1.41814	0.242163	0.665948	8.13649e+06	35.1129
252	2272				-1.46814	0.230352	0.633469	8.1365e+06	35.1129
253	2273				-1.51814	0.219118	0.602575	8.1365e+06	35.1129
254	2274				-1.56814	0.208432	0.573187	8.1365e+06	35.1129
255	2275				-1.61814	0.198266	0.545232	8.1365e+06	35.1129
256	2276				-1.66814	0.188597	0.518641	8.1365e+06	35.1129
257	2277				-1.71814	0.179399	0.493346	8.1365e+06	35.1129
258	2278				-1.76814	0.170649	0.469286	8.1365e+06	35.1129
259	2279				-1.81814	0.162327	0.446398	8.1365e+06	35.1129
260	2280				-1.86814	0.15441	0.424627	8.1365e+06	35.1129
261	2281				-1.91814	0.146879	0.403918	8.1365e+06	35.1129
262	2282				-1.96814	0.139716	0.384218	8.1365e+06	35.1129
263	2283				-2.01814	0.132902	0.36548	8.1365e+06	35.1129
264	2284				-2.06814	0.12642	0.347655	8.1365e+06	35.1129
265	2285				-2.11814	0.120255	0.3307	8.1365e+06	35.1129
266	2286				-2.16814	0.11439	0.314571	8.1365e+06	35.1129
267	2287				-2.21814	0.108811	0.29923	8.1365e+06	35.1129
268	2288				-2.26814	0.103504	0.284636	8.1365e+06	35.1129
269	2289				-2.31814	0.0984561	0.270754	8.13651e+06	35.1129
270	2290				-2.36814	0.0936543	0.257549	8.13651e+06	35.1129
271	2291				-2.41814	0.0890867	0.244989	8.13651e+06	35.1129
272	2292				-2.46814	0.0847419	0.23304	8.13651e+06	35.1129
273	2293				-2.51814	0.080609	0.221675	8.13651e+06	35.1129
274	2294				-2.56814	0.0766777	0.210864	8.13651e+06	35.1129
275	2295				-2.61814	0.0729381	0.20058	8.13651e+06	35.1129
276	2296				-2.66814	0.0693808	0.190797	8.13651e+06	35.1129
277	2297				-2.71814	0.0659971	0.181492	8.13651e+06	35.1129
278	2298				-2.76814	0.0627784	0.17264	8.13651e+06	35.1129
279	2299				-2.81814	0.0597166	0.164221	8.13651e+06	35.1129
280	2300				-2.86814	0.0568042	0.156212	8.13651e+06	35.1129
281	2301				-2.91814	0.0540338	0.148593	8.13651e+06	35.1129
282	2302				-2.96814	0.0513986	0.141346	8.13651e+06	35.1129
283	2303				-3.01814	0.0488918	0.134453	8.13651e+06	35.1129
284	2304				-3.06814	0.0465074	0.127895	8.13651e+06	35.1129
285	2305				-3.11814	0.0442392	0.121658	8.13651e+06	35.1129
286	2306				-3.16814	0.0420816	0.115724	8.13651e+06	35.1129
287	2307				-3.21814	0.0400293	0.11008	8.13651e+06	35.1129
288	2308				-3.26814	0.038077	0.104712	8.13651e+06	35.1129
289	2309				-3.31814	0.03622	0.0996049	8.13651e+06	35.1129
290	2310				-3.36814	0.0344535	0.0947471	8.13651e+06	35.1129
291	2311				-3.41814	0.0327732	0.0901262	8.13651e+06	35.1129
292	2312				-3.46814	0.0311748	0.0857307	8.13651e+06	35.1129
293	2313				-3.51814	0.0296544	0.0815496	8.13651e+06	35.1129
294	2314				-3.56814	0.0282081	0.0775724	8.13651e+06	35.1129
295	2315				-3.61814	0.0268324	0.0737891	8.13651e+06	35.1129
296	2316				-3.66814	0.0255238	0.0701904	8.13651e+06	35.1129
297	2317				-3.71814	0.024279	0.0667672	8.13651e+06	35.1129
298	2318				-3.76814	0.0230949	0.0635109	8.13651e+06	35.1129
299	2319				-3.81814	0.0219685	0.0604134	8.13651e+06	35.1129
300	2320				-3.86814	0.0208971	0.057467	8.13651e+06	35.1129
301	2321				-3.91814	0.0198779	0.0546643	8.13651e+06	35.1129
302	2322				-3.96814	0.0189085	0.0519983	8.13651e+06	35.1129
303	2323				-4.01814	0.0179863	0.0494623	8.13651e+06	35.1129
304	2324				-4.06814	0.0171091	0.04705	8.13651e+06	35.1129
305	2325				-4.11814	0.0162747	0.0447554	8.13651e+06	35.1129
306	2326				-4.16814	0.015481	0.0425726	8.13651e+06	35.1129
307	2327				-4.21814	0.0147259	0.0404963	8.13651e+06	35.1129
308	2328				-4.26814	0.0140077	0.0385213	8.13651e+06	35.1129
309	2329				-4.31814	0.0133246	0.0366426	8.13651e+06	35.1129
310	2330				-4.36814	0.0126747	0.0348555	8.13651e+06	35.1129
311	2331				-4.41814	0.0120566	0.0331556	8.13651e+06	35.1129
312	2332				-4.46814	0.0114686	0.0315386	8.13651e+06	35.1129
313	2333				-4.51814	0.0109092	0.0300004	8.13651e+06	35.1129
314	2334				-4.56814	0.0103772	0.0285373	8.13651e+06	35.1129
315	2335				-4.61814	0.00987109	0.0271455	8.13651e+06	35.1129
316	2336				-4.66814	0.00938967	0.0258216	8.13651e+06	35.1129
317	2337				-4.71814	0.00893173	0.0245623	8.13651e+06	35.1129
318	2338				-4.76814	0.00849613	0.0233644	8.13651e+06	35.1129
319	2339				-4.81814	0.00808177	0.0222249	8.13651e+06	35.1129
320	2340				-4.86814	0.00768761	0.0211409	8.13651e+06	35.1129
321	2341				-4.91814	0.00731268	0.0201099	8.13651e+06	35.1129
322	2342				-4.96814	0.00695604	0.0191291	8.13651e+06	35.1129
323	2343				-5.01814	0.00661679	0.0181962	8.13651e+06	35.1129
324	2344				-5.06814	0.00629409	0.0173087	8.13651e+06	35.1129
325	2345				-5.11814	0.00598712	0.0164646	8.13651e+06	35.1129
326	2346				-5.16814	0.00569512	0.0156616	8.13651e+06	35.1129
327	2347				-5.21814	0.00541737	0.0148978	8.13651e+06	35.1129
328	2348				-5.26814	0.00515316	0.0141712	8.13651e+06	35.1129
329	2349				-5.31814	0.00490184	0.0134801	8.13651e+06	35.1129
330	2350				-5.36814	0.00466277	0.0128226	8.13651e+06	35.1129
331	2351				-5.41814	0.00443537	0.0121973	8.13651e+06	35.1129
332	2352				-5.46814	0.00421905	0.0116024	8.13651e+06	35.1129
333	2353				-5.51814	0.00401329	0.0110365	8.13651e+06	35.1129
334	2354				-5.56814	0.00381756	0.0104983	8.13651e+06	35.1129
335	2355				-5.61814	0.00363137	0.00998627	8.13651e+06	35.1129
336	2356				-5.66814	0.00345427	0.00949924	8.13651e+06	35.1129
337	2357				-5.71814	0.0032858	0.00903595	8.13651e+06	35.1129
338	2358				-5.76814	0.00312555	0.00859526	8.13651e+06	35.1129
339	2359				-5.81814	0.00297312	0.00817607	8.13651e+06	35.1129
340	2360				-5.86814	0.00282812	0.00777732	8.13651e+06	35.1129
341	2361				-5.91814	0.00269019	0.00739801	8.13651e+06	35.1129
342	2362				-5.96814	0.00255898	0.00703721	8.13651e+06	35.1129
343	2363				-6.01814	0.00243418	0.006694	8.13651e+06	35.1129
344	2364				-6.06814	0.00231546	0.00636753	8.13651e+06	35.1129
345	2365				-6.11814	0.00220254	0.00605698	8.13651e+06	35.1129
346	2366				-6.16814	0.00209512	0.00576158	8.13651e+06	35.1129
347	2367				-6.21814	0.00199294	0.00548058	8.13651e+06	35.1129
348	2368				-6.26814	0.00189574	0.00521329	8.13651e+06	35.1129
349	2369				-6.31814	0.00180329	0.00495904	8.13651e+06	35.1129
350	2370				-6.36814	0.00171534	0.00471718	8.13651e+06	35.1129
351	2371				-6.41814	0.00163168	0.00448712	8.13651e+06	35.1129
352	2372				-6.46814	0.0015521	0.00426828	8.13651e+06	35.1129
353	2373				-6.51814	0.00147641	0.00406012	8.13651e+06	35.1129
354	2374				-6.56814	0.0014044	0.0038621	8.13651e+06	35.1129
355	2375				-6.61814	0.00133591	0.00367374	8.13651e+06	35.1129
356	2376				-6.66814	0.00127075	0.00349457	8.13651e+06	35.1129
357	2377				-6.71814	0.00120878	0.00332414	8.13651e+06	35.1129
358	2378				-6.76814	0.00114983	0.00316202	8.13651e+06	35.1129
359	2379				-6.81814	0.00109375	0.00300781	8.13651e+06	35.1129
360	2380				-6.86814	0.00104041	0.00286111	8.13651e+06	35.1129
361	2381				-6.91814	0.000989664	0.00272158	8.13651e+06	35.1129
362	2382				-6.96814	0.000941398	0.00258884	8.13651e+06	35.1129
363	2383				-7.01814	0.000895485	0.00246258	8.13651e+06	35.1129
364	2384				-7.06814	0.000851812	0.00234248	8.13651e+06	35.1129
365	2385				-7.11814	0.000810269	0.00222824	8.13651e+06	35.1129
366	2386				-7.16814	0.000770751	0.00211957	8.13651e+06	35.1129
367	2387				-7.21814	0.000733161	0.00201619	8.13651e+06	35.1129
368	2388				-7.26814	0.000697405	0.00191786	8.13651e+06	35.1129
369	2389				-7.31814	0.000663392	0.00182433	8.13651e+06	35.1129
370	2390				-7.36814	0.000631038	0.00173535	8.13651e+06	35.1129
371	2391				-7.41814	0.000600262	0.00165072	8.13651e+06	35.1129
372	2392				-7.46814	0.000570987	0.00157021	8.13651e+06	35.1129
373	2393				-7.51814	0.000543139	0.00149363	8.13651e+06	35.1129
374	2394				-7.56814	0.00051665	0.00142079	8.13651e+06	35.1129
375	2395				-7.61814	0.000491453	0.0013515	8.13651e+06	35.1129
376	2396				-7.66814	0.000467484	0.00128558	8.13651e+06	35.1129
377	2397				-7.71814	0.000444685	0.00122288	8.13651e+06	35.1129
378	2398				-7.76814	0.000422997	0.00116324	8.13651e+06	35.1129
379	2399				-7.81814	0.000402367	0.00110651	8.13651e+06	35.1129
380	2400				-7.86814	0.000382744	0.00105255	8.13651e+06	35.1129
381	2401				-7.91814	0.000364077	0.00100121	8.13651e+06	35.1129
382	2402				-7.96814	0.000346321	0.000952382	8.13651e+06	35.1129
383	2403				-8.01814	0.000329431	0.000905934	8.13651e+06	35.1129
384	2404				-8.06814	0.000313364	0.000861751	8.13651e+06	35.1129
385	2405				-8.11814	0.000298081	0.000819723	8.13651e+06	35.1129
386	2406				-8.16814	0.000283544	0.000779745	8.13651e+06	35.1129
387	2407				-8.21814	0.000269715	0.000741716	8.13651e+06	35.1129
388	2408				-8.26814	0.000256561	0.000705542	8.13651e+06	35.1129
389	2409				-8.31814	0.000244048	0.000671133	8.13651e+06	35.1129
390	2410				-8.36814	0.000232146	0.000638401	8.13651e+06	35.1129
391	2411				-8.41814	0.000220824	0.000607266	8.13651e+06	35.1129
392	2412				-8.46814	0.000210054	0.000577649	8.13651e+06	35.1129
393	2413				-8.51814	0.00019981	0.000549477	8.13651e+06	35.1129
394	2414				-8.56814	0.000190065	0.000522679	8.13651e+06	35.1129
395	2415				-8.61814	0.000180795	0.000497187	8.13651e+06	35.1129
396	2416				-8.66814	0.000171978	0.000472939	8.13651e+06	35.1129
397	2417				-8.71814	0.00016359	0.000449874	8.13651e+06	35.1129
398	2418				-8.76814	0.000155612	0.000427933	8.13651e+06	35.1129
399	2419				-8.81814	0.000148023	0.000407062	8.13651e+06	35.1129
400	2420				-8.86814	0.000140804	0.00038721	8.13651e+06	35.1129
401	2421				-8.91814	0.000133936	0.000368325	8.13651e+06	35.1129
402	2422				-8.96814	0.000127404	0.000350362	8.13651e+06	35.1129
403	2423				-9.01814	0.000121191	0.000333275	8.13651e+06	35.1129
404	2424				-9.06814	0.00011528	0.000317021	8.13651e+06	35.1129
405	2425				-9.11814	0.000109658	0.000301559	8.13651e+06	35.1129
406	2426				-9.16814	0.00010431	0.000286852	8.13651e+06	35.1129
407	2427				-9.21814	9.92226e-05	0.000272862	8.13651e+06	35.1129
408	2428				-9.26814	9.43835e-05	0.000259554	8.13651e+06	35.1129
409	2429				-9.31814	8.97803e-05	0.000246896	8.13651e+06	35.1129
410	2430				-9.36814	8.54017e-05	0.000234855	8.13651e+06	35.1129
411	2431				-9.41814	8.12366e-05	0.000223401	8.13651e+06	35.1129
412	2432				-9.46814	7.72746e-05	0.000212505	8.13651e+06	35.1129
413	2433				-9.51814	7.35059e-05	0.000202141	8.13651e+06	35.1129
414	2434				-9.56814	6.9921e-05	0.000192283	8.13651e+06	35.1129
415	2435				-9.61814	6.65109e-05	0.000182905	8.13651e+06	35.1129
416	2436				-9.66814	6.32671e-05	0.000173985	8.13651e+06	35.1129
417	2437				-9.71814	6.01815e-05	0.000165499	8.13651e+06	35.1129
418	2438				-9.76814	5.72465e-05	0.000157428	8.13651e+06	35.1129
419	2439				-9.81814	5.44545e-05	0.00014975	8.13651e+06	35.1129
420	2440				-9.86814	5.17987e-05	0.000142447	8.13651e+06	35.1129
421	2441				-9.91814	4.92725e-05	0.000135499	8.13651e+06	35.1129
422	2442				-9.96814	4.68694e-05	0.000128891	8.13651e+06	35.1129
423	2443				-10.0181	4.45836e-05	0.000122605	8.13651e+06	35.1129
424	2444				-10.0681	4.24092e-05	0.000116625	8.13651e+06	35.1129
425	2445				-10.1181	4.03409e-05	0.000110937	8.13651e+06	35.1129
426	2446				-10.1681	3.83734e-05	0.000105527	8.13651e+06	35.1129
427	2447				-10.2181	3.6502e-05	0.00010038	8.13651e+06	35.1129
428	2448				-10.2681	3.47217e-05	9.54848e-05	8.13651e+06	35.1129
429	2449				-10.3181	3.30283e-05	9.08279e-05	8.13651e+06	35.1129
430	2450				-10.3681	3.14175e-05	8.63982e-05	8.13651e+06	35.1129
431	2451				-10.4181	2.98853e-05	8.21845e-05	8.13651e+06	35.1129
432	2452				-10.4681	2.84277e-05	7.81763e-05	8.13651e+06	35.1129
433	2453				-10.5181	2.70413e-05	7.43636e-05	8.13651e+06	35.1129
434	2454				-10.5681	2.57225e-05	7.07369e-05	8.13651e+06	35.1129
435	2455				-10.6181	2.4468e-05	6.7287e-05	8.13651e+06	35.1129
436	2456				-10.6681	2.32747e-05	6.40053e-05	8.13651e+06	35.1129
437	2457				-10.7181	2.21396e-05	6.08838e-05	8.13651e+06	35.1129
438	2458				-10.7681	2.10598e-05	5.79144e-05	8.13651e+06	35.1129
439	2459				-10.8181	2.00327e-05	5.50899e-05	8.13651e+06	35.1129
440	2460				-10.8681	1.90557e-05	5.24031e-05	8.13651e+06	35.1129
441	2461				-10.9181	1.81263e-05	4.98474e-05	8.13651e+06	35.1129
442	2462				-10.9681	1.72423e-05	4.74163e-05	8.13651e+06	35.1129
443	2463				-11.0181	1.64014e-05	4.51038e-05	8.13651e+06	35.1129
444	2464				-11.0681	1.56015e-05	4.29041e-05	8.13651e+06	35.1129
445	2465				-11.1181	1.48406e-05	4.08116e-05	8.13651e+06	35.1129
446	2466				-11.1681	1.41168e-05	3.88212e-05	8.13651e+06	35.1129
447	2467				-11.2181	1.34283e-05	3.69279e-05	8.13651e+06	35.1129
448	2468				-11.2681	1.27734e-05	3.51269e-05	8.13651e+06	35.1129
449	2469				-11.3181	1.21504e-05	3.34137e-05	8.13651e+06	35.1129
450	2470				-11.3681	1.15579e-05	3.17841e-05	8.13651e+06	35.1129
451	2471				-11.4181	1.09942e-05	3.0234e-05	8.13651e+06	35.1129
452	2472				-11.4681	1.0458e-05	2.87595e-05	8.13651e+06	35.1129
453	2473				-11.5181	9.94794e-06	2.73568e-05	8.13651e+06	35.1129
454	2474				-11.5681	9.46278e-06	2.60226e-05	8.13651e+06	35.1129
455	2475				-11.6181	9.00127e-06	2.47535e-05	8.13651e+06	35.1129
456	2476				-11.6681	8.56227e-06	2.35463e-05	8.13651e+06	35.1129
457	2477				-11.7181	8.14469e-06	2.23979e-05	8.13651e+06	35.1129
458	2478				-11.7681	7.74747e-06	2.13055e-05	8.13651e+06	35.1129
459	2479				-11.8181	7.36962e-06	2.02664e-05	8.13651e+06	35.1129
460	2480				-11.8681	7.0102e-06	1.9278e-05	8.13651e+06	35.1129
461	2481				-11.9181	6.66831e-06	1.83378e-05	8.13651e+06	35.1129
462	2482				-11.9681	6.34309e-06	1.74435e-05	8.13651e+06	35.1129
463	2483				-12.0181	6.03373e-06	1.65928e-05	8.13651e+06	35.1129
464	2484				-12.0681	5.73946e-06	1.57835e-05	8.13651e+06	35.1129
465	2485				-12.1181	5.45955e-06	1.50138e-05	8.13651e+06	35.1129
466	2486				-12.1681	5.19328e-06	1.42815e-05	8.13651e+06	35.1129
467	2487				-12.2181	4.94e-06	1.3585e-05	8.13651e+06	35.1129
468	2488				-12.2681	4.69908e-06	1.29225e-05	8.13651e+06	35.1129
469	2489				-12.3181	4.4699e-06	1.22922e-05	8.13651e+06	35.1129
470	2490				-12.3681	4.2519e-06	1.16927e-05	8.13651e+06	35.1129
471	2491				-12.4181	4.04453e-06	1.11225e-05	8.13651e+06	35.1129
472	2492				-12.4681	3.84728e-06	1.058e-05	8.13651e+06	35.1129
473	2493				-12.5181	3.65964e-06	1.0064e-05	8.13651e+06	35.1129
474	2494				-12.5681	3.48116e-06	9.57319e-06	8.13651e+06	35.1129
475	2495				-12.6181	3.31138e-06	9.1063e-06	8.13651e+06	35.1129
476	2496				-12.6681	3.14988e-06	8.66218e-06	8.13651e+06	35.1129
477	2497				-12.7181	2.99626e-06	8.23972e-06	8.13651e+06	35.1129
478	2498				-12.7681	2.85013e-06	7.83787e-06	8.13651e+06	35.1129
479	2499				-12.8181	2.71113e-06	7.45561e-06	8.13651e+06	35.1129
480	2500				-12.8681	2.57891e-06	7.09199e-06	8.13651e+06	35.1129
481	2501				-12.9181	2.45313e-06	6.74611e-06	8.13651e+06	35.1129
482	2502				-12.9681	2.33349e-06	6.4171e-06	8.13651e+06	35.1129
483	2503				-13.0181	2.21969e-06	6.10414e-06	8.13651e+06	35.1129
484	2504				-13.0681	2.11143e-06	5.80643e-06	8.13651e+06	35.1129
485	2505				-13.1181	2.00845e-06	5.52325e-06	8.13651e+06	35.1129
486	2506				-13.1681	1.9105e-06	5.25388e-06	8.13651e+06	35.1129
487	2507				-13.2181	1.81733e-06	4.99764e-06	8.13651e+06	35.1129
488	2508				-13.2681	1.72869e-06	4.75391e-06	8.13651e+06	35.1129
489	2509				-13.3181	1.64438e-06	4.52206e-06	8.13651e+06	35.1129
490	2510				-13.3681	1.56419e-06	4.30151e-06	8.13651e+06	35.1129
491	2511				-13.4181	1.4879e-06	4.09173e-06	8.13651e+06	35.1129
492	2512				-13.4681	1.41533e-06	3.89217e-06	8.13651e+06	35.1129
493	2513				-13.5181	1.34631e-06	3.70235e-06	8.13651e+06	35.1129
494	2514				-13.5681	1.28065e-06	3.52178e-06	8.13651e+06	35.1129
495	2515				-13.6181	1.21819e-06	3.35002e-06	8.13651e+06	35.1129
496	2516				-13.6681	1.15878e-06	3.18664e-06	8.13651e+06	35.1129
497	2517				-13.7181	1.10226e-06	3.03122e-06	8.13651e+06	35.1129
498	2518				-13.7681	1.04851e-06	2.88339e-06	8.13651e+06	35.1129
499	2519				-13.8181	9.97369e-07	2.74277e-06	8.13651e+06	35.1129
500	2520				-13.8681	9.48727e-07	2.609e-06	8.13651e+06	35.1129
501	2521				-13.9181	9.02457e-07	2.48176e-06	8.13651e+06	35.1129
502	2522				-13.9681	8.58444e-07	2.36072e-06	8.13651e+06	35.1129
503	2523				-14.0181	8.16577e-07	2.24559e-06	8.13651e+06	35.1129
504	2524				-14.0681	7.76752e-07	2.13607e-06	8.13651e+06	35.1129
505	2525				-14.1181	7.38869e-07	2.03189e-06	8.13651e+06	35.1129
506	2526				-14.1681	7.02834e-07	1.93279e-06	8.13651e+06	35.1129
507	2527				-14.2181	6.68557e-07	1.83853e-06	8.13651e+06	35.1129
508	2528				-14.2681	6.35951e-07	1.74886e-06	8.13651e+06	35.1129
509	2529				-14.3181	6.04935e-07	1.66357e-06	8.13651e+06	35.1129
510	2530				-14.3681	5.75432e-07	1.58244e-06	8.13651e+06	35.1129
511	2531				-14.4181	5.47368e-07	1.50526e-06	8.13651e+06	35.1129
512	2532				-14.4681	5.20672e-07	1.43185e-06	8.13651e+06	35.1129
513	2533				-14.5181	4.95279e-07	1.36202e-06	8.13651e+06	35.1129
514	2534				-14.5681	4.71124e-07	1.29559e-06	8.13651e+06	35.1129
515	2535				-14.6181	4.48147e-07	1.2324e-06	8.13651e+06	35.1129
516	2536				-14.6681	4.26291e-07	1.1723e-06	8.13651e+06	35.1129
517	2537				-14.7181	4.055e-07	1.11513e-06	8.13651e+06	35.1129
518	2538				-14.7681	3.85724e-07	1.06074e-06	8.13651e+06	35.1129
519	2539				-14.8181	3.66912e-07	1.00901e-06	8.13651e+06	35.1129
520	2540				-14.8681	3.49017e-07	9.59797e-07	8.13651e+06	35.1129
521	2541				-14.9181	3.31995e-07	9.12987e-07	8.13651e+06	35.1129
522	2542				-14.9681	3.15804e-07	8.6846e-07	8.13651e+06	35.1129
523	2543				-15.0181	3.00402e-07	8.26105e-07	8.13651e+06	35.1129
524	2544				-15.0681	2.85751e-07	7.85815e-07	8.13651e+06	35.1129
525	2545				-15.1181	2.71815e-07	7.47491e-07	8.13651e+06	35.1129
526	2546				-15.1681	2.58558e-07	7.11035e-07	8.13651e+06	35.1129
527	2547				-15.2181	2.45948e-07	6.76358e-07	8.13651e+06	35.1129
528	2548				-15.2681	2.33953e-07	6.43371e-07	8.13651e+06	35.1129
529	2549				-15.3181	2.22543e-07	6.11994e-07	8.13651e+06	35.1129
530	2550				-15.3681	2.1169e-07	5.82146e-07	8.13651e+06	35.1129
531	2551				-15.4181	2.01365e-07	5.53755e-07	8.13651e+06	35.1129
532	2552				-15.4681	1.91545e-07	5.26748e-07	8.13651e+06	35.1129
533	2553				-15.5181	1.82203e-07	5.01058e-07	8.13651e+06	35.1129
534	2554				-15.5681	1.73317e-07	4.76621e-07	8.13651e+06	35.1129
535	2555				-15.6181	1.64864e-07	4.53376e-07	8.13651e+06	35.1129
536	2556				-15.6681	1.56824e-07	4.31265e-07	8.13651e+06	35.1129
537	2557				-15.7181	1.49175e-07	4.10232e-07	8.13651e+06	35.1129
538	2558				-15.7681	1.419e-07	3.90224e-07	8.13651e+06	35.1129
539	2559				-15.8181	1.34979e-07	3.71193e-07	8.13651e+06	35.1129
540	2560				-15.8681	1.28396e-07	3.5309e-07	8.13651e+06	35.1129
541	2561				-15.9181	1.22134e-07	3.35869e-07	8.13651e+06	35.1129
542	2562				-15.9681	1.16178e-07	3.19489e-07	8.13651e+06	35.1129
543	2563				-16.0181	1.10512e-07	3.03907e-07	8.13651e+06	35.1129
544	2564				-16.0681	1.05122e-07	2.89085e-07	8.13651e+06	35.1129
545	2565				-16.1181	9.99951e-08	2.74986e-07	8.13651e+06	35.1129
546	2566				-16.1681	9.51183e-08	2.61575e-07	8.13651e+06	35.1129
547	2567				-16.2181	9.04793e-08	2.48818e-07	8.13651e+06	35.1129
548	2568				-16.2681	8.60666e-08	2.36683e-07	8.13651e+06	35.1129
549	2569				-16.3181	8.18691e-08	2.2514e-07	8.13651e+06	35.1129
550	2570				-16.3681	7.78763e-08	2.1416e-07	8.13651e+06	35.1129
551	2571				-16.4181	7.40782e-08	2.03715e-07	8.13651e+06	35.1129
552	2572				-16.4681	7.04653e-08	1.9378e-07	8.13651e+06	35.1129
553	2573				-16.5181	6.70287e-08	1.84329e-07	8.13651e+06	35.1129
554	2574				-16.5681	6.37597e-08	1.75339e-07	8.13651e+06	35.1129
555	2575				-16.6181	6.06501e-08	1.66788e-07	8.13651e+06	35.1129
556	2576				-16.6681	5.76921e-08	1.58653e-07	8.13651e+06	35.1129
557	2577				-16.7181	5.48785e-08	1.50916e-07	8.13651e+06	35.1129
558	2578				-16.7681	5.2202e-08	1.43556e-07	8.13651e+06	35.1129
559	2579				-16.8181	4.96561e-08	1.36554e-07	8.13651e+06	35.1129
560	2580				-16.8681	4.72343e-08	1.29894e-07	8.13651e+06	35.1129
561	2581				-16.9181	4.49307e-08	1.23559e-07	8.13651e+06	35.1129
562	2582				-16.9681	4.27394e-08	1.17533e-07	8.13651e+06	35.1129
563	2583				-17.0181	4.0655e-08	1.11801e-07	8.13651e+06	35.1129
564	2584				-17.0681	3.86722e-08	1.06349e-07	8.13651e+06	35.1129
565	2585				-17.1181	3.67861e-08	1.01162e-07	8.13651e+06	35.1129
566	2586				-17.1681	3.49921e-08	9.62282e-08	8.13651e+06	35.1129
567	2587				-17.2181	3.32855e-08	9.1535e-08	8.13651e+06	35.1129
568	2588				-17.2681	3.16621e-08	8.70708e-08	8.13651e+06	35.1129
569	2589				-17.3181	3.01179e-08	8.28243e-08	8.13651e+06	35.1129
570	2590				-17.3681	2.86491e-08	7.87849e-08	8.13651e+06	35.1129
571	2591				-17.4181	2.72518e-08	7.49426e-08	8.13651e+06	35.1129
572	2592				-17.4681	2.59228e-08	7.12876e-08	8.13651e+06	35.1129
573	2593				-17.5181	2.46585e-08	6.78108e-08	8.13651e+06	35.1129
574	2594				-17.5681	2.34559e-08	6.45037e-08	8.13651e+06	35.1129
575	2595				-17.6181	2.23119e-08	6.13578e-08	8.13651e+06	35.1129
576	2596				-17.6681	2.12238e-08	5.83653e-08	8.13651e+06	35.1129
577	2597				-17.7181	2.01887e-08	5.55188e-08	8.13651e+06	35.1129
578	2598				-17.7681	1.9204e-08	5.28111e-08	8.13651e+06	35.1129
579	2599				-17.8181	1.82675e-08	5.02355e-08	8.13651e+06	35.1129
580	2600				-17.8681	1.73765e-08	4.77855e-08	8.13651e+06	35.1129
581	2601				-17.9181	1.65291e-08	4.5455e-08	8.13651e+06	35.1129
582	2602				-17.9681	1.57229e-08	4.32381e-08	8.13651e+06	35.1129
583	2603				-18.0181	1.49561e-08	4.11293e-08	8.13651e+06	35.1129
584	2604				-18.0681	1.42267e-08	3.91234e-08	8.13651e+06	35.1129
585	2605				-18.1181	1.35329e-08	3.72154e-08	8.13651e+06	35.1129
586	2606				-18.1681	1.28729e-08	3.54004e-08	8.13651e+06	35.1129
587	2607				-18.2181	1.2245e-08	3.36739e-08	8.13651e+06	35.1129
588	2608				-18.2681	1.16478e-08	3.20316e-08	8.13651e+06	35.1129
589	2609				-18.3181	1.10798e-08	3.04694e-08	8.13651e+06	35.1129
590	2610				-18.3681	1.05394e-08	2.89834e-08	8.13651e+06	35.1129
591	2611				-18.4181	1.00254e-08	2.75698e-08	8.13651e+06	35.1129
592	2612				-18.4681	9.53645e-09	2.62252e-08	8.13651e+06	35.1129
593	2613				-18.5181	9.07135e-09	2.49462e-08	8.13651e+06	35.1129
594	2614				-18.5681	8.62893e-09	2.37296e-08	8.13651e+06	35.1129
595	2615				-18.6181	8.2081e-09	2.25723e-08	8.13651e+06	35.1129
596	2616				-18.6681	7.80778e-09	2.14714e-08	8.13651e+06	35.1129
597	2617				-18.7181	7.42699e-09	2.04242e-08	8.13651e+06	35.1129
598	2618				-18.7681	7.06477e-09	1.94281e-08	8.13651e+06	35.1129
599	2619				-18.8181	6.72022e-09	1.84806e-08	8.13651e+06	35.1129
600	2620				-18.8681	6.39247e-09	1.75793e-08	8.13651e+06	35.1129
601	2621				-18.9181	6.08071e-09	1.67219e-08	8.13651e+06	35.1129
602	2622				-18.9681	5.78415e-09	1.59064e-08	8.13651e+06	35.1129
603	2623				-19.0181	5.50205e-09	1.51306e-08	8.13651e+06	35.1129
604	2624				-19.0681	5.23371e-09	1.43927e-08	8.13651e+06	35.1129
605	2625				-19.1181	4.97846e-09	1.36908e-08	8.13651e+06	35.1129
606	2626				-19.1681	4.73566e-09	1.30231e-08	8.13651e+06	35.1129
607	2627				-19.2181	4.5047e-09	1.23879e-08	8.13651e+06	35.1129
608	2628				-19.2681	4.285e-09	1.17838e-08	8.13651e+06	35.1129
609	2629				-19.3181	4.07602e-09	1.12091e-08	8.13651e+06	35.1129
610	2630				-19.3681	3.87723e-09	1.06624e-08	8.13651e+06	35.1129
611	2631				-19.4181	3.68814e-09	1.01424e-08	8.13651e+06	35.1129
612	2632				-19.4681	3.50826e-09	9.64772e-09	8.13651e+06	35.1129
613	2633				-19.5181	3.33716e-09	9.1772e-09	8.13651e+06	35.1129
614	2634				-19.5681	3.17441e-09	8.72962e-09	8.13651e+06	35.1129
615	2635				-19.6181	3.01959e-09	8.30387e-09	8.13651e+06	35.1129
616	2636				-19.6681	2.87232e-09	7.89889e-09	8.13651e+06	35.1129
617	2637				-19.7181	2.73224e-09	7.51365e-09	8.13651e+06	35.1129
618	2638				-19.7681	2.59899e-09	7.14721e-09	8.13651e+06	35.1129
619	2639				-19.8181	2.47223e-09	6.79864e-09	8.13651e+06	35.1129
620	2640				-19.8681	2.35166e-09	6.46706e-09	8.13651e+06	35.1129
621	2641				-19.9181	2.23697e-09	6.15166e-09	8.13651e+06	35.1129
622	2642				-19.9681	2.12787e-09	5.85164e-09	8.13651e+06	35.1129
623	2643				-20.0181	2.02409e-09	5.56625e-09	8.13651e+06	35.1129
624	2644				-20.0681	1.92538e-09	5.29478e-09	8.13651e+06	35.1129
625	2645				-20.1181	1.83147e-09	5.03655e-09	8.13651e+06	35.1129
626	2646				-20.1681	1.74215e-09	4.79092e-09	8.13651e+06	35.1129
627	2647				-20.2181	1.65719e-09	4.55726e-09	8.13651e+06	35.1129
628	2648				-20.2681	1.57636e-09	4.335e-09	8.13651e+06	35.1129
629	2649				-20.3181	1.49948e-09	4.12358e-09	8.13651e+06	35.1129
630	2650				-20.3681	1.42635e-09	3.92247e-09	8.13651e+06	35.1129
631	2651				-20.4181	1.35679e-09	3.73117e-09	8.13651e+06	35.1129
632	2652				-20.4681	1.29062e-09	3.5492e-09	8.13651e+06	35.1129
633	2653				-20.5181	1.22767e-09	3.3761e-09	8.13651e+06	35.1129
634	2654				-20.5681	1.1678e-09	3.21145e-09	8.13651e+06	35.1129
635	2655				-20.6181	1.11085e-09	3.05482e-09	8.13651e+06	35.1129
636	2656				-20.6681	1.05667e-09	2.90584e-09	8.13651e+06	35.1129
637	2657				-20.7181	1.00513e-09	2.76412e-09	8.13651e+06	35.1129
638	2658				-20.7681	9.56113e-10	2.62931e-09	8.13651e+06	35.1129
639	2659				-20.8181	9.09483e-10	2.50108e-09	8.13651e+06	35.1129
640	2660				-20.8681	8.65127e-10	2.3791e-09	8.13651e+06	35.1129
641	2661				-20.9181	8.22934e-10	2.26307e-09	8.13651e+06	35.1129
642	2662				-20.9681	7.82799e-10	2.1527e-09	8.13651e+06	35.1129
643	2663				-21.0181	7.44622e-10	2.04771e-09	8.13651e+06	35.1129
644	2664				-21.0681	7.08306e-10	1.94784e-09	8.13651e+06	35.1129
645	2665				-21.1181	6.73762e-10	1.85284e-09	8.13651e+06	35.1129
646	2666				-21.1681	6.40902e-10	1.76248e-09	8.13651e+06	35.1129
647	2667				-21.2181	6.09645e-10	1.67652e-09	8.13651e+06	35.1129
648	2668				-21.2681	5.79912e-10	1.59476e-09	8.13651e+06	35.1129
649	2669				-21.3181	5.51629e-10	1.51698e-09	8.13651e+06	35.1129
650	2670				-21.3681	5.24726e-10	1.443e-09	8.13651e+06	35.1129
651	2671				-21.4181	4.99135e-10	1.37262e-09	8.13651e+06	35.1129
652	2672				-21.4681	4.74792e-10	1.30568e-09	8.13651e+06	35.1129
653	2673				-21.5181	4.51636e-10	1.242e-09	8.13651e+06	35.1129
654	2674				-21.5681	4.29609e-10	1.18143e-09	8.13651e+06	35.1129
655	2675				-21.6181	4.08657e-10	1.12381e-09	8.13651e+06	35.1129
656	2676				-21.6681	3.88727e-10	1.069e-09	8.13651e+06	35.1129
657	2677				-21.7181	3.69768e-10	1.01686e-09	8.13651e+06	35.1129
658	2678				-21.7681	3.51734e-10	9.6727e-10	8.13651e+06	35.1129
659	2679				-21.8181	3.3458e-10	9.20095e-10	8.13651e+06	35.1129
660	2680				-21.8681	3.18262e-10	8.75222e-10	8.13651e+06	35.1129
661	2681				-21.9181	3.02741e-10	8.32537e-10	8.13651e+06	35.1129
662	2682				-21.9681	2.87976e-10	7.91933e-10	8.13651e+06	35.1129
663	2683				-22.0181	2.73931e-10	7.5331e-10	8.13651e+06	35.1129
664	2684				-22.0681	2.60571e-10	7.16571e-10	8.13651e+06	35.1129
665	2685				-22.1181	2.47863e-10	6.81623e-10	8.13651e+06	35.1129
666	2686				-22.1681	2.35775e-10	6.4838e-10	8.13651e+06	35.1129
667	2687				-22.2181	2.24276e-10	6.16758e-10	8.13651e+06	35.1129
668	2688				-22.2681	2.13338e-10	5.86679e-10	8.13651e+06	35.1129
669	2689				-22.3181	2.02933e-10	5.58066e-10	8.13651e+06	35.1129
670	2690				-22.3681	1.93036e-10	5.30849e-10	8.13651e+06	35.1129
671	2691				-22.4181	1.83621e-10	5.04959e-10	8.13651e+06	35.1129
672	2692				-22.4681	1.74666e-10	4.80332e-10	8.13651e+06	35.1129
673	2693				-22.5181	1.66148e-10	4.56906e-10	8.13651e+06	35.1129
674	2694				-22.5681	1.58044e-10	4.34622e-10	8.13651e+06	35.1129
675	2695				-22.6181	1.50337e-10	4.13425e-10	8.13651e+06	35.1129
676	2696				-22.6681	1.43005e-10	3.93262e-10	8.13651e+06	35.1129
677	2697				-22.7181	1.3603e-10	3.74083e-10	8.13651e+06	35.1129
678	2698				-22.7681	1.29396e-10	3.55839e-10	8.13651e+06	35.1129
679	2699				-22.8181	1.23085e-10	3.38484e-10	8.13651e+06	35.1129
680	2700				-22.8681	1.17082e-10	3.21976e-10	8.13651e+06	35.1129
681	2701				-22.9181	1.11372e-10	3.06273e-10	8.13651e+06	35.1129
682	2702				-22.9681	1.0594e-10	2.91336e-10	8.13651e+06	35.1129
683	2703				-23.0181	1.00774e-10	2.77127e-10	8.13651e+06	35.1129
684	2704				-23.0681	9.58588e-11	2.63612e-10	8.13651e+06	35.1129
685	2705				-23.1181	9.11837e-11	2.50755e-10	8.13651e+06	35.1129
686	2706				-23.1681	8.67366e-11	2.38526e-10	8.13651e+06	35.1129
687	2707				-23.2181	8.25064e-11	2.26893e-10	8.13651e+06	35.1129
688	2708				-23.2681	7.84826e-11	2.15827e-10	8.13651e+06	35.1129
689	2709				-23.3181	7.46549e-11	2.05301e-10	8.13651e+06	35.1129
690	2710				-23.3681	7.10139e-11	1.95288e-10	8.13651e+06	35.1129
691	2711				-23.4181	6.75506e-11	1.85764e-10	8.13651e+06	35.1129
692	2712				-23.4681	6.42561e-11	1.76704e-10	8.13651e+06	35.1129
693	2713				-23.5181	6.11223e-11	1.68086e-10	8.13651e+06	35.1129
694	2714				-23.5681	5.81413e-11	1.59889e-10	8.13651e+06	35.1129
695	2715				-23.6181	5.53057e-11	1.52091e-10	8.13651e+06	35.1129
696	2716				-23.6681	5.26084e-11	1.44673e-10	8.13651e+06	35.1129
697	2717				-23.7181	5.00427e-11	1.37617e-10	8.13651e+06	35.1129
698	2718				-23.7681	4.76021e-11	1.30906e-10	8.13651e+06	35.1129
699	2719				-23.8181	4.52805e-11	1.24521e-10	8.13651e+06	35.1129
700	2720				-23.8681	4.30721e-11	1.18448e-10	8.13651e+06	35.1129

## Sheet: Switchgrass Fit Low Rain
SUMMARY OUTPUT
Regression Statistics
Multiple R	1
R Square	1
Adjusted R Square	1
Standard Error	5.28597e-16
Observations	107
ANOVA
	df	SS	MS	F	Significance F
Regression	1	14.6992	14.6992	5.26073e+31	0
Residual	105	2.93385e-29	2.79415e-31
Total	106	14.6992
	Coefficients	Standard Error	t Stat	P-value	Lower 95%	Upper 95%	Lower 95.0%	Upper 95.0%
Intercept	34.2806	3.43175e-15	9989260307347770	0	34.2806	34.2806	34.2806	34.2806
X Variable 1	-0.012	1.65447e-18	-7253085723889059	0	-0.012	-0.012	-0.012	-0.012
RESIDUAL OUTPUT
Observation	Predicted Y	Residuals
1	10.0286	5.32907e-15
2	10.0166	5.32907e-15
3	10.0046	5.32907e-15
4	9.99262	7.10543e-15
5	9.98062	7.10543e-15
6	9.96862	7.10543e-15
7	9.95662	8.88178e-15
8	9.94462	8.88178e-15
9	9.93262	5.32907e-15
10	9.92062	5.32907e-15
11	9.90862	7.10543e-15
12	9.89662	7.10543e-15
13	9.88462	7.10543e-15
14	9.87262	7.10543e-15
15	9.86062	8.88178e-15
16	9.84862	8.88178e-15
17	9.83662	5.32907e-15
18	9.82462	5.32907e-15
19	9.81262	7.10543e-15
20	9.80062	7.10543e-15
21	9.78862	7.10543e-15
22	9.77662	7.10543e-15
23	9.76462	8.88178e-15
24	9.75262	8.88178e-15
25	9.74062	5.32907e-15
26	9.72862	5.32907e-15
27	9.71662	7.10543e-15
28	9.70462	7.10543e-15
29	9.69262	7.10543e-15
30	9.68062	7.10543e-15
31	9.66862	8.88178e-15
32	9.65662	5.32907e-15
33	9.64462	5.32907e-15
34	9.63262	7.10543e-15
35	9.62062	7.10543e-15
36	9.60862	7.10543e-15
37	9.59662	7.10543e-15
38	9.58462	7.10543e-15
39	9.57262	8.88178e-15
40	9.56062	5.32907e-15
41	9.54862	5.32907e-15
42	9.53662	7.10543e-15
43	9.52462	7.10543e-15
44	9.51262	7.10543e-15
45	9.50062	7.10543e-15
46	9.48862	7.10543e-15
47	9.47662	8.88178e-15
48	9.46462	5.32907e-15
49	9.45262	5.32907e-15
50	9.44062	7.10543e-15
51	9.42862	7.10543e-15
52	9.41662	7.10543e-15
53	9.40462	7.10543e-15
54	9.39262	8.88178e-15
55	9.38062	8.88178e-15
56	9.36862	5.32907e-15
57	9.35662	5.32907e-15
58	9.34462	7.10543e-15
59	9.33262	7.10543e-15
60	9.32062	7.10543e-15
61	9.30862	7.10543e-15
62	9.29662	8.88178e-15
63	9.28462	8.88178e-15
64	9.27262	5.32907e-15
65	9.26062	5.32907e-15
66	9.24862	7.10543e-15
67	9.23662	7.10543e-15
68	9.22462	7.10543e-15
69	9.21262	7.10543e-15
70	9.20062	8.88178e-15
71	9.18862	5.32907e-15
72	9.17662	5.32907e-15
73	9.16462	5.32907e-15
74	9.15262	7.10543e-15
75	9.14062	7.10543e-15
76	9.12862	7.10543e-15
77	9.11662	7.10543e-15
78	9.10462	8.88178e-15
79	9.09262	5.32907e-15
80	9.08062	5.32907e-15
81	9.06862	7.10543e-15
82	9.05662	7.10543e-15
83	9.04462	7.10543e-15
84	9.03262	7.10543e-15
85	9.02062	7.10543e-15
86	9.00862	8.88178e-15
87	8.99662	5.32907e-15
88	8.98462	5.32907e-15
89	8.97262	7.10543e-15
90	8.96062	7.10543e-15
91	8.94862	7.10543e-15
92	8.93662	7.10543e-15
93	8.92462	8.88178e-15
94	8.91262	8.88178e-15
95	8.90062	5.32907e-15
96	8.88862	5.32907e-15
97	8.87662	7.10543e-15
98	8.86462	7.10543e-15
99	8.85262	7.10543e-15
100	8.84062	7.10543e-15
101	8.82862	8.88178e-15
102	8.81662	5.32907e-15
103	8.80462	5.32907e-15
104	8.79262	5.32907e-15
105	8.78062	7.10543e-15
106	8.76862	7.10543e-15
107	8.75662	7.10543e-15

## Sheet: Switchgrass k=0.012 Low Rain
Total Waste in Place		23172413	tonnes
Total Degradable Waste		23172413	tonnes
Location		United States
Default Lo		140	m3/Mg
Default LandGem Model k		0.012
Years Since Landfill Closure	Year	CH4 emissions LandGEM (tonnes/yr)	CO2 emissions LandGEM (tonnes)	LandGem Ln(CH4)	Model Predicted Ln(CH4)	From Fit CH4 emissions LandGEM (tonnes/yr)	From Fit CO2 emissions LandGEM (tonnes/yr)	Cumulative Waste Decomposed (tonnes)	Percentage of Degradable Waste Placed That has Decomposed	Percentage of Total Waste Placed That has Decomposed
-33	1987	0				0	0	0	0
-32	1988	208.602	573.656			208.602	573.656	782.258	0.00337581
-31	1989	429.726	1181.75			429.726	1181.75	2393.73	0.0103301
-30	1990	664.305	1826.84			664.305	1826.84	4884.88	0.0210806
-29	1991	913.335	2511.67			913.335	2511.67	8309.88	0.0358611
-28	1992	1177.89	3239.18			1177.89	3239.18	12727	0.0549229
-27	1993	1459.1	4012.53			1459.1	4012.53	18198.6	0.0785355
-26	1994	1758.21	4835.08			1758.21	4835.08	24791.9	0.106989
-25	1995	2076.53	5710.45			2076.53	5710.45	32578.9	0.140593
-24	1996	2415.47	6642.53			2415.47	6642.53	41636.9	0.179683
-23	1997	2776.53	7635.47			2776.53	7635.47	52048.9	0.224616
-22	1998	3148.85	8659.34			3148.85	8659.34	63857	0.275574
-21	1999	3532.41	9714.14			3532.41	9714.14	77103.6	0.332739
-20	2000	3903.55	10734.8			3903.55	10734.8	91741.9	0.39591
-19	2001	4289.3	11795.6			4289.3	11795.6	107827	0.465324
-18	2002	4778.59	13141.1			4778.59	13141.1	125747	0.542656
-17	2003	5284.96	14533.6			5284.96	14533.6	145565	0.628183
-16	2004	5889.34	16195.7			5889.34	16195.7	167650	0.72349
-15	2005	6523.48	17939.6			6523.48	17939.6	192113	0.82906
-14	2006	7266.61	19983.2			7266.61	19983.2	219363	0.946656
-13	2007	8078.72	22216.5			8078.72	22216.5	249658	1.07739
-12	2008	8970.47	24668.8			8970.47	24668.8	283297	1.22256
-11	2009	10009	27524.7			10009	27524.7	320831	1.38454
-10	2010	10948.6	30108.7			10948.6	30108.7	361888	1.56172
-9	2011	11898	32719.5			11898	32719.5	406506	1.75427
-8	2012	12720.9	34982.4			12720.9	34982.4	454209	1.96013
-7	2013	13616.8	37446.2			13616.8	37446.2	505272	2.18049
-6	2014	15024.3	41316.9			15024.3	41316.9	561613	2.42363
-5	2015	16182.6	44502			16182.6	44502	622298	2.68551
-4	2016	17296.3	47564.8			17296.3	47564.8	687159	2.96542
-3	2017	18301.9	50330.1			18301.9	50330.1	755791	3.2616
-2	2018	19683.5	54129.6			19683.5	54129.6	829604	3.58014
-1	2019	21265.5	58480.2			21265.5	58480.2	909350	3.92428
0	2020	22939.6	63083.9			22939.6	63083.9	995373	4.29551
1	2021	22666		10.0286	10.0286	22666	62331.4	1.08037e+06	4.66231
2	2022	22395.6		10.0166	10.0166	22395.6	61587.9	1.16435e+06	5.02474
3	2023	22128.5		10.0046	10.0046	22128.5	60853.3	1.24734e+06	5.38285
4	2024	21864.5		9.99262	9.99262	21864.5	60127.4	1.32933e+06	5.73668
5	2025	21603.7		9.98062	9.98062	21603.7	59410.2	1.41034e+06	6.0863
6	2026	21346		9.96862	9.96862	21346	58701.5	1.49039e+06	6.43174
7	2027	21091.4		9.95662	9.95662	21091.4	58001.3	1.56948e+06	6.77306
8	2028	20839.8		9.94462	9.94462	20839.8	57309.5	1.64763e+06	7.11032
9	2029	20591.2		9.93262	9.93262	20591.2	56625.9	1.72485e+06	7.44354
10	2030	20345.6		9.92062	9.92062	20345.6	55950.4	1.80114e+06	7.7728
11	2031	20102.9		9.90862	9.90862	20102.9	55283	1.87653e+06	8.09812
12	2032	19863.1		9.89662	9.89662	19863.1	54623.6	1.95102e+06	8.41957
13	2033	19626.2		9.88462	9.88462	19626.2	53972	2.02462e+06	8.73718
14	2034	19392.1		9.87262	9.87262	19392.1	53328.2	2.09734e+06	9.051
15	2035	19160.8		9.86062	9.86062	19160.8	52692.1	2.16919e+06	9.36108
16	2036	18932.2		9.84862	9.84862	18932.2	52063.6	2.24018e+06	9.66746
17	2037	18706.4		9.83662	9.83662	18706.4	51442.6	2.31033e+06	9.97019
18	2038	18483.3		9.82462	9.82462	18483.3	50828.9	2.37965e+06	10.2693
19	2039	18262.8		9.81262	9.81262	18262.8	50222.6	2.44813e+06	10.5649
20	2040	18044.9		9.80062	9.80062	18044.9	49623.6	2.5158e+06	10.8569
21	2041	17829.7		9.78862	9.78862	17829.7	49031.6	2.58266e+06	11.1454
22	2042	17617		9.77662	9.77662	17617	48446.8	2.64872e+06	11.4305
23	2043	17406.9		9.76462	9.76462	17406.9	47868.9	2.714e+06	11.7122
24	2044	17199.2		9.75262	9.75262	17199.2	47297.9	2.7785e+06	11.9905
25	2045	16994.1		9.74062	9.74062	16994.1	46733.7	2.84223e+06	12.2656
26	2046	16791.4		9.72862	9.72862	16791.4	46176.3	2.90519e+06	12.5373
27	2047	16591.1		9.71662	9.71662	16591.1	45625.5	2.96741e+06	12.8058
28	2048	16393.2		9.70462	9.70462	16393.2	45081.2	3.02888e+06	13.0711
29	2049	16197.6		9.69262	9.69262	16197.6	44543.5	3.08963e+06	13.3332
30	2050	16004.4		9.68062	9.68062	16004.4	44012.2	3.14964e+06	13.5922
31	2051	15813.5		9.66862	9.66862	15813.5	43487.2	3.20894e+06	13.8481
32	2052	15624.9		9.65662	9.65662	15624.9	42968.4	3.26754e+06	14.101
33	2053	15438.5		9.64462	9.64462	15438.5	42455.9	3.32543e+06	14.3508
34	2054	15254.4		9.63262	9.63262	15254.4	41949.5	3.38263e+06	14.5977
35	2055	15072.4		9.62062	9.62062	15072.4	41449.1	3.43916e+06	14.8416
36	2056	14892.6		9.60862	9.60862	14892.6	40954.7	3.495e+06	15.0826
37	2057	14715		9.59662	9.59662	14715	40466.2	3.55018e+06	15.3207
38	2058	14539.4		9.58462	9.58462	14539.4	39983.5	3.60471e+06	15.556
39	2059	14366		9.57262	9.57262	14366	39506.5	3.65858e+06	15.7885
40	2060	14194.6		9.56062	9.56062	14194.6	39035.3	3.71181e+06	16.0182
41	2061	14025.3		9.54862	9.54862	14025.3	38569.7	3.7644e+06	16.2452
42	2062	13858		9.53662	9.53662	13858	38109.6	3.81637e+06	16.4695
43	2063	13692.7		9.52462	9.52462	13692.7	37655	3.86772e+06	16.6911
44	2064	13529.4		9.51262	9.51262	13529.4	37205.8	3.91846e+06	16.91
45	2065	13368		9.50062	9.50062	13368	36762	3.96859e+06	17.1263
46	2066	13208.6		9.48862	9.48862	13208.6	36323.5	4.01812e+06	17.3401
47	2067	13051		9.47662	9.47662	13051	35890.3	4.06706e+06	17.5513
48	2068	12895.3		9.46462	9.46462	12895.3	35462.2	4.11542e+06	17.76
49	2069	12741.5		9.45262	9.45262	12741.5	35039.1	4.1632e+06	17.9662
50	2070	12589.5		9.44062	9.44062	12589.5	34621.2	4.21041e+06	18.1699
51	2071	12439.4		9.42862	9.42862	12439.4	34208.2	4.25705e+06	18.3712
52	2072	12291		9.41662	9.41662	12291	33800.2	4.30315e+06	18.5701
53	2073	12144.4		9.40462	9.40462	12144.4	33397	4.34869e+06	18.7667
54	2074	11999.5		9.39262	9.39262	11999.5	32998.6	4.39369e+06	18.9608
55	2075	11856.4		9.38062	9.38062	11856.4	32605	4.43815e+06	19.1527
56	2076	11714.9		9.36862	9.36862	11714.9	32216.1	4.48208e+06	19.3423
57	2077	11575.2		9.35662	9.35662	11575.2	31831.8	4.52548e+06	19.5296
58	2078	11437.1		9.34462	9.34462	11437.1	31452.1	4.56837e+06	19.7147
59	2079	11300.7		9.33262	9.33262	11300.7	31076.9	4.61075e+06	19.8976
60	2080	11165.9		9.32062	9.32062	11165.9	30706.2	4.65262e+06	20.0783
61	2081	11032.7		9.30862	9.30862	11032.7	30340	4.694e+06	20.2568
62	2082	10901.1		9.29662	9.29662	10901.1	29978.1	4.73488e+06	20.4332
63	2083	10771.1		9.28462	9.28462	10771.1	29620.5	4.77527e+06	20.6076
64	2084	10642.6		9.27262	9.27262	10642.6	29267.2	4.81518e+06	20.7798
65	2085	10515.7		9.26062	9.26062	10515.7	28918.1	4.85461e+06	20.95
66	2086	10390.2		9.24862	9.24862	10390.2	28573.1	4.89357e+06	21.1181
67	2087	10266.3		9.23662	9.23662	10266.3	28232.3	4.93207e+06	21.2842
68	2088	10143.8		9.22462	9.22462	10143.8	27895.5	4.97011e+06	21.4484
69	2089	10022.8		9.21262	9.21262	10022.8	27562.8	5.0077e+06	21.6106
70	2090	9903.27		9.20062	9.20062	9903.27	27234	5.04484e+06	21.7709
71	2091	9785.14		9.18862	9.18862	9785.14	26909.1	5.08153e+06	21.9292
72	2092	9668.42		9.17662	9.17662	9668.42	26588.2	5.11779e+06	22.0857
73	2093	9553.09		9.16462	9.16462	9553.09	26271	5.15361e+06	22.2403
74	2094	9439.14		9.15262	9.15262	9439.14	25957.6	5.18901e+06	22.393
75	2095	9326.55		9.14062	9.14062	9326.55	25648	5.22398e+06	22.544
76	2096	9215.3		9.12862	9.12862	9215.3	25342.1	5.25854e+06	22.6931
77	2097	9105.38		9.11662	9.11662	9105.38	25039.8	5.29268e+06	22.8405
78	2098	8996.77		9.10462	9.10462	8996.77	24741.1	5.32642e+06	22.986
79	2099	8889.45		9.09262	9.09262	8889.45	24446	5.35976e+06	23.1299
80	2100	8783.41		9.08062	9.08062	8783.41	24154.4	5.39269e+06	23.272
81	2101	8678.64		9.06862	9.06862	8678.64	23866.3	5.42524e+06	23.4125
82	2102	8575.12		9.05662	9.05662	8575.12	23581.6	5.4574e+06	23.5513
83	2103	8472.83		9.04462	9.04462	8472.83	23300.3	5.48917e+06	23.6884
84	2104	8371.77		9.03262	9.03262	8371.77	23022.4	5.52056e+06	23.8239
85	2105	8271.91		9.02062	9.02062	8271.91	22747.7	5.55158e+06	23.9577
86	2106	8173.24		9.00862	9.00862	8173.24	22476.4	5.58223e+06	24.09
87	2107	8075.74		8.99662	8.99662	8075.74	22208.3	5.61252e+06	24.2207
88	2108	7979.41		8.98462	8.98462	7979.41	21943.4	5.64244e+06	24.3498
89	2109	7884.23		8.97262	8.97262	7884.23	21681.6	5.67201e+06	24.4774
90	2110	7790.19		8.96062	8.96062	7790.19	21423	5.70122e+06	24.6035
91	2111	7697.27		8.94862	8.94862	7697.27	21167.5	5.73008e+06	24.728
92	2112	7605.45		8.93662	8.93662	7605.45	20915	5.7586e+06	24.8511
93	2113	7514.73		8.92462	8.92462	7514.73	20665.5	5.78678e+06	24.9727
94	2114	7425.09		8.91262	8.91262	7425.09	20419	5.81463e+06	25.0929
95	2115	7336.52		8.90062	8.90062	7336.52	20175.4	5.84214e+06	25.2116
96	2116	7249.01		8.88862	8.88862	7249.01	19934.8	5.86932e+06	25.3289
97	2117	7162.54		8.87662	8.87662	7162.54	19697	5.89618e+06	25.4448
98	2118	7077.11		8.86462	8.86462	7077.11	19462	5.92272e+06	25.5594
99	2119	6992.69		8.85262	8.85262	6992.69	19229.9	5.94895e+06	25.6725
100	2120	6909.28		8.84062	8.84062	6909.28	19000.5	5.97486e+06	25.7843
101	2121	6826.86		8.82862	8.82862	6826.86	18773.9	6.00046e+06	25.8948
102	2122	6745.43		8.81662	8.81662	6745.43	18549.9	6.02575e+06	26.004
103	2123	6664.97		8.80462	8.80462	6664.97	18328.7	6.05075e+06	26.1118
104	2124	6585.47		8.79262	8.79262	6585.47	18110	6.07544e+06	26.2184
105	2125	6506.91		8.78062	8.78062	6506.91	17894	6.09984e+06	26.3237
106	2126	6429.3		8.76862	8.76862	6429.3	17680.6	6.12395e+06	26.4278
107	2127	6352.61		8.75662	8.75662	6352.61	17469.7	6.14777e+06	26.5306
108	2128				8.74462	6276.83	17261.3	6.17131e+06	26.6321
109	2129				8.73262	6201.96	17055.4	6.19457e+06	26.7325
110	2130				8.72062	6127.98	16851.9	6.21755e+06	26.8317
111	2131				8.70862	6054.88	16650.9	6.24025e+06	26.9297
112	2132				8.69662	5982.66	16452.3	6.26269e+06	27.0265
113	2133				8.68462	5911.3	16256.1	6.28486e+06	27.1222
114	2134				8.67262	5840.78	16062.2	6.30676e+06	27.2167
115	2135				8.66062	5771.11	15870.6	6.3284e+06	27.3101
116	2136				8.64862	5702.27	15681.3	6.34979e+06	27.4023
117	2137				8.63662	5634.26	15494.2	6.37091e+06	27.4935
118	2138				8.62462	5567.05	15309.4	6.39179e+06	27.5836
119	2139				8.61262	5500.64	15126.8	6.41242e+06	27.6726
120	2140				8.60062	5435.03	14946.3	6.4328e+06	27.7606
121	2141				8.58862	5370.2	14768	6.45294e+06	27.8475
122	2142				8.57662	5306.14	14591.9	6.47284e+06	27.9334
123	2143				8.56462	5242.85	14417.8	6.4925e+06	28.0182
124	2144				8.55262	5180.31	14245.9	6.51192e+06	28.102
125	2145				8.54062	5118.52	14075.9	6.53112e+06	28.1849
126	2146				8.52862	5057.46	13908	6.55008e+06	28.2667
127	2147				8.51662	4997.14	13742.1	6.56882e+06	28.3476
128	2148				8.50462	4937.53	13578.2	6.58734e+06	28.4275
129	2149				8.49262	4878.63	13416.2	6.60563e+06	28.5064
130	2150				8.48062	4820.44	13256.2	6.62371e+06	28.5845
131	2151				8.46862	4762.94	13098.1	6.64157e+06	28.6615
132	2152				8.45662	4706.13	12941.8	6.65922e+06	28.7377
133	2153				8.44462	4649.99	12787.5	6.67666e+06	28.8129
134	2154				8.43262	4594.52	12634.9	6.69388e+06	28.8873
135	2155				8.42062	4539.72	12484.2	6.71091e+06	28.9608
136	2156				8.40862	4485.57	12335.3	6.72773e+06	29.0334
137	2157				8.39662	4432.06	12188.2	6.74435e+06	29.1051
138	2158				8.38462	4379.2	12042.8	6.76077e+06	29.1759
139	2159				8.37262	4326.96	11899.1	6.777e+06	29.246
140	2160				8.36062	4275.35	11757.2	6.79303e+06	29.3152
141	2161				8.34862	4224.35	11617	6.80887e+06	29.3835
142	2162				8.33662	4173.96	11478.4	6.82452e+06	29.4511
143	2163				8.32462	4124.17	11341.5	6.83999e+06	29.5178
144	2164				8.31262	4074.98	11206.2	6.85527e+06	29.5838
145	2165				8.30062	4026.37	11072.5	6.87037e+06	29.6489
146	2166				8.28862	3978.34	10940.4	6.88529e+06	29.7133
147	2167				8.27662	3930.89	10809.9	6.90003e+06	29.7769
148	2168				8.26462	3884	10681	6.91459e+06	29.8398
149	2169				8.25262	3837.67	10553.6	6.92899e+06	29.9019
150	2170				8.24062	3791.89	10427.7	6.9432e+06	29.9632
151	2171				8.22862	3746.66	10303.3	6.95725e+06	30.0239
152	2172				8.21662	3701.97	10180.4	6.97114e+06	30.0838
153	2173				8.20462	3657.81	10059	6.98485e+06	30.143
154	2174				8.19262	3614.18	9939	6.99841e+06	30.2015
155	2175				8.18062	3571.07	9820.44	7.0118e+06	30.2593
156	2176				8.16862	3528.47	9703.3	7.02503e+06	30.3164
157	2177				8.15662	3486.38	9587.56	7.0381e+06	30.3728
158	2178				8.14462	3444.8	9473.19	7.05102e+06	30.4285
159	2179				8.13262	3403.71	9360.19	7.06379e+06	30.4836
160	2180				8.12062	3363.11	9248.54	7.0764e+06	30.538
161	2181				8.10862	3322.99	9138.22	7.08886e+06	30.5918
162	2182				8.09662	3283.35	9029.22	7.10117e+06	30.6449
163	2183				8.08462	3244.19	8921.52	7.11334e+06	30.6974
164	2184				8.07262	3205.49	8815.1	7.12536e+06	30.7493
165	2185				8.06062	3167.25	8709.95	7.13724e+06	30.8006
166	2186				8.04862	3129.47	8606.05	7.14897e+06	30.8512
167	2187				8.03662	3092.15	8503.4	7.16057e+06	30.9013
168	2188				8.02462	3055.26	8401.97	7.17202e+06	30.9507
169	2189				8.01262	3018.82	8301.75	7.18334e+06	30.9996
170	2190				8.00062	2982.81	8202.72	7.19453e+06	31.0478
171	2191				7.98862	2947.23	8104.88	7.20558e+06	31.0955
172	2192				7.97662	2912.07	8008.2	7.2165e+06	31.1426
173	2193				7.96462	2877.34	7912.68	7.22729e+06	31.1892
174	2194				7.95262	2843.01	7818.29	7.23795e+06	31.2352
175	2195				7.94062	2809.1	7725.03	7.24849e+06	31.2807
176	2196				7.92862	2775.59	7632.89	7.2589e+06	31.3256
177	2197				7.91662	2742.49	7541.84	7.26918e+06	31.37
178	2198				7.90462	2709.77	7451.88	7.27934e+06	31.4138
179	2199				7.89262	2677.45	7362.99	7.28938e+06	31.4572
180	2200				7.88062	2645.51	7275.16	7.2993e+06	31.5
181	2201				7.86862	2613.96	7188.38	7.30911e+06	31.5423
182	2202				7.85662	2582.78	7102.64	7.31879e+06	31.5841
183	2203				7.84462	2551.97	7017.91	7.32836e+06	31.6254
184	2204				7.83262	2521.53	6934.2	7.33782e+06	31.6662
185	2205				7.82062	2491.45	6851.49	7.34716e+06	31.7065
186	2206				7.80862	2461.73	6769.76	7.35639e+06	31.7463
187	2207				7.79662	2432.37	6689.01	7.36551e+06	31.7857
188	2208				7.78462	2403.35	6609.22	7.37452e+06	31.8246
189	2209				7.77262	2374.69	6530.39	7.38343e+06	31.863
190	2210				7.76062	2346.36	6452.49	7.39223e+06	31.901
191	2211				7.74862	2318.37	6375.52	7.40092e+06	31.9385
192	2212				7.73662	2290.72	6299.47	7.40951e+06	31.9756
193	2213				7.72462	2263.39	6224.33	7.418e+06	32.0122
194	2214				7.71262	2236.39	6150.09	7.42639e+06	32.0484
195	2215				7.70062	2209.72	6076.73	7.43467e+06	32.0842
196	2216				7.68862	2183.36	6004.24	7.44286e+06	32.1195
197	2217				7.67662	2157.32	5932.62	7.45095e+06	32.1544
198	2218				7.66462	2131.58	5861.85	7.45894e+06	32.1889
199	2219				7.65262	2106.16	5791.93	7.46684e+06	32.223
200	2220				7.64062	2081.03	5722.84	7.47465e+06	32.2567
201	2221				7.62862	2056.21	5654.58	7.48236e+06	32.2899
202	2222				7.61662	2031.68	5587.13	7.48998e+06	32.3228
203	2223				7.60462	2007.45	5520.49	7.4975e+06	32.3553
204	2224				7.59262	1983.5	5454.64	7.50494e+06	32.3874
205	2225				7.58062	1959.84	5389.57	7.51229e+06	32.4191
206	2226				7.56862	1936.47	5325.28	7.51955e+06	32.4505
207	2227				7.55662	1913.37	5261.76	7.52673e+06	32.4814
208	2228				7.54462	1890.54	5199	7.53382e+06	32.512
209	2229				7.53262	1867.99	5136.98	7.54082e+06	32.5422
210	2230				7.52062	1845.71	5075.71	7.54774e+06	32.5721
211	2231				7.50862	1823.7	5015.16	7.55458e+06	32.6016
212	2232				7.49662	1801.94	4955.34	7.56134e+06	32.6308
213	2233				7.48462	1780.45	4896.23	7.56802e+06	32.6596
214	2234				7.47262	1759.21	4837.83	7.57461e+06	32.6881
215	2235				7.46062	1738.23	4780.12	7.58113e+06	32.7162
216	2236				7.44862	1717.49	4723.1	7.58757e+06	32.744
217	2237				7.43662	1697.01	4666.76	7.59394e+06	32.7715
218	2238				7.42462	1676.76	4611.1	7.60022e+06	32.7986
219	2239				7.41262	1656.76	4556.1	7.60644e+06	32.8254
220	2240				7.40062	1637	4501.75	7.61258e+06	32.8519
221	2241				7.38862	1617.47	4448.05	7.61864e+06	32.8781
222	2242				7.37662	1598.18	4394.99	7.62464e+06	32.9039
223	2243				7.36462	1579.12	4342.57	7.63056e+06	32.9295
224	2244				7.35262	1560.28	4290.77	7.63641e+06	32.9547
225	2245				7.34062	1541.67	4239.59	7.64219e+06	32.9797
226	2246				7.32862	1523.28	4189.02	7.6479e+06	33.0043
227	2247				7.31662	1505.11	4139.05	7.65355e+06	33.0287
228	2248				7.30462	1487.16	4089.68	7.65912e+06	33.0528
229	2249				7.29262	1469.42	4040.89	7.66463e+06	33.0765
230	2250				7.28062	1451.89	3992.69	7.67008e+06	33.1
231	2251				7.26862	1434.57	3945.07	7.67546e+06	33.1233
232	2252				7.25662	1417.46	3898.01	7.68077e+06	33.1462
233	2253				7.24462	1400.55	3851.51	7.68602e+06	33.1689
234	2254				7.23262	1383.84	3805.57	7.69121e+06	33.1913
235	2255				7.22062	1367.34	3760.18	7.69634e+06	33.2134
236	2256				7.20862	1351.03	3715.32	7.70141e+06	33.2352
237	2257				7.19662	1334.91	3671.01	7.70641e+06	33.2568
238	2258				7.18462	1318.99	3627.22	7.71136e+06	33.2782
239	2259				7.17262	1303.26	3583.95	7.71625e+06	33.2993
240	2260				7.16062	1287.71	3541.2	7.72108e+06	33.3201
241	2261				7.14862	1272.35	3498.96	7.72585e+06	33.3407
242	2262				7.13662	1257.17	3457.22	7.73056e+06	33.3611
243	2263				7.12462	1242.18	3415.99	7.73522e+06	33.3812
244	2264				7.11262	1227.36	3375.24	7.73982e+06	33.401
245	2265				7.10062	1212.72	3334.98	7.74437e+06	33.4206
246	2266				7.08862	1198.25	3295.2	7.74886e+06	33.44
247	2267				7.07662	1183.96	3255.89	7.7533e+06	33.4592
248	2268				7.06462	1169.84	3217.05	7.75769e+06	33.4781
249	2269				7.05262	1155.88	3178.68	7.76202e+06	33.4968
250	2270				7.04062	1142.1	3140.76	7.76631e+06	33.5153
251	2271				7.02862	1128.47	3103.3	7.77054e+06	33.5336
252	2272				7.01662	1115.01	3066.28	7.77472e+06	33.5516
253	2273				7.00462	1101.71	3029.71	7.77885e+06	33.5695
254	2274				6.99262	1088.57	2993.57	7.78293e+06	33.5871
255	2275				6.98062	1075.59	2957.86	7.78697e+06	33.6045
256	2276				6.96862	1062.76	2922.58	7.79095e+06	33.6217
257	2277				6.95662	1050.08	2887.72	7.79489e+06	33.6387
258	2278				6.94462	1037.55	2853.27	7.79878e+06	33.6555
259	2279				6.93262	1025.18	2819.24	7.80263e+06	33.672
260	2280				6.92062	1012.95	2785.61	7.80642e+06	33.6884
261	2281				6.90862	1000.87	2752.38	7.81018e+06	33.7046
262	2282				6.89662	988.927	2719.55	7.81389e+06	33.7206
263	2283				6.88462	977.131	2687.11	7.81755e+06	33.7365
264	2284				6.87262	965.475	2655.06	7.82117e+06	33.7521
265	2285				6.86062	953.959	2623.39	7.82475e+06	33.7675
266	2286				6.84862	942.58	2592.09	7.82828e+06	33.7828
267	2287				6.83662	931.336	2561.17	7.83178e+06	33.7978
268	2288				6.82462	920.227	2530.62	7.83523e+06	33.8127
269	2289				6.81262	909.25	2500.44	7.83864e+06	33.8274
270	2290				6.80062	898.404	2470.61	7.84201e+06	33.842
271	2291				6.78862	887.688	2441.14	7.84533e+06	33.8564
272	2292				6.77662	877.099	2412.02	7.84862e+06	33.8705
273	2293				6.76462	866.637	2383.25	7.85187e+06	33.8846
274	2294				6.75262	856.3	2354.82	7.85508e+06	33.8984
275	2295				6.74062	846.085	2326.74	7.85826e+06	33.9121
276	2296				6.72862	835.993	2298.98	7.86139e+06	33.9257
277	2297				6.71662	826.021	2271.56	7.86449e+06	33.939
278	2298				6.70462	816.168	2244.46	7.86755e+06	33.9522
279	2299				6.69262	806.433	2217.69	7.87057e+06	33.9653
280	2300				6.68062	796.813	2191.24	7.87356e+06	33.9782
281	2301				6.66862	787.309	2165.1	7.87651e+06	33.9909
282	2302				6.65662	777.917	2139.27	7.87943e+06	34.0035
283	2303				6.64462	768.638	2113.76	7.88231e+06	34.0159
284	2304				6.63262	759.47	2088.54	7.88516e+06	34.0282
285	2305				6.62062	750.41	2063.63	7.88798e+06	34.0404
286	2306				6.60862	741.459	2039.01	7.89076e+06	34.0524
287	2307				6.59662	732.615	2014.69	7.8935e+06	34.0642
288	2308				6.58462	723.876	1990.66	7.89622e+06	34.0759
289	2309				6.57262	715.242	1966.91	7.8989e+06	34.0875
290	2310				6.56062	706.71	1943.45	7.90155e+06	34.099
291	2311				6.54862	698.28	1920.27	7.90417e+06	34.1103
292	2312				6.53662	689.951	1897.36	7.90676e+06	34.1214
293	2313				6.52462	681.721	1874.73	7.90931e+06	34.1325
294	2314				6.51262	673.589	1852.37	7.91184e+06	34.1434
295	2315				6.50062	665.554	1830.27	7.91434e+06	34.1541
296	2316				6.48862	657.615	1808.44	7.9168e+06	34.1648
297	2317				6.47662	649.771	1786.87	7.91924e+06	34.1753
298	2318				6.46462	642.021	1765.56	7.92165e+06	34.1857
299	2319				6.45262	634.362	1744.5	7.92402e+06	34.1959
300	2320				6.44062	626.796	1723.69	7.92637e+06	34.2061
301	2321				6.42862	619.319	1703.13	7.9287e+06	34.2161
302	2322				6.41662	611.932	1682.81	7.93099e+06	34.226
303	2323				6.40462	604.632	1662.74	7.93326e+06	34.2358
304	2324				6.39262	597.42	1642.9	7.9355e+06	34.2455
305	2325				6.38062	590.294	1623.31	7.93771e+06	34.255
306	2326				6.36862	583.253	1603.94	7.9399e+06	34.2645
307	2327				6.35662	576.295	1584.81	7.94206e+06	34.2738
308	2328				6.34462	569.421	1565.91	7.9442e+06	34.283
309	2329				6.33262	562.629	1547.23	7.94631e+06	34.2921
310	2330				6.32062	555.918	1528.77	7.94839e+06	34.3011
311	2331				6.30862	549.287	1510.54	7.95045e+06	34.31
312	2332				6.29662	542.735	1492.52	7.95249e+06	34.3188
313	2333				6.28462	536.261	1474.72	7.9545e+06	34.3274
314	2334				6.27262	529.864	1457.13	7.95648e+06	34.336
315	2335				6.26062	523.544	1439.74	7.95845e+06	34.3445
316	2336				6.24862	517.299	1422.57	7.96039e+06	34.3529
317	2337				6.23662	511.128	1405.6	7.9623e+06	34.3611
318	2338				6.22462	505.031	1388.84	7.9642e+06	34.3693
319	2339				6.21262	499.007	1372.27	7.96607e+06	34.3774
320	2340				6.20062	493.055	1355.9	7.96792e+06	34.3854
321	2341				6.18862	487.174	1339.73	7.96975e+06	34.3932
322	2342				6.17662	481.362	1323.75	7.97155e+06	34.401
323	2343				6.16462	475.621	1307.96	7.97333e+06	34.4087
324	2344				6.15262	469.947	1292.35	7.9751e+06	34.4163
325	2345				6.14062	464.342	1276.94	7.97684e+06	34.4239
326	2346				6.12862	458.803	1261.71	7.97856e+06	34.4313
327	2347				6.11662	453.33	1246.66	7.98026e+06	34.4386
328	2348				6.10462	447.923	1231.79	7.98194e+06	34.4459
329	2349				6.09262	442.58	1217.09	7.9836e+06	34.453
330	2350				6.08062	437.3	1202.58	7.98524e+06	34.4601
331	2351				6.06862	432.084	1188.23	7.98686e+06	34.4671
332	2352				6.05662	426.93	1174.06	7.98846e+06	34.474
333	2353				6.04462	421.838	1160.05	7.99004e+06	34.4808
334	2354				6.03262	416.806	1146.22	7.9916e+06	34.4876
335	2355				6.02062	411.834	1132.54	7.99315e+06	34.4942
336	2356				6.00862	406.922	1119.03	7.99467e+06	34.5008
337	2357				5.99662	402.068	1105.69	7.99618e+06	34.5073
338	2358				5.98462	397.272	1092.5	7.99767e+06	34.5138
339	2359				5.97262	392.533	1079.47	7.99914e+06	34.5201
340	2360				5.96062	387.851	1066.59	8.0006e+06	34.5264
341	2361				5.94862	383.224	1053.87	8.00204e+06	34.5326
342	2362				5.93662	378.653	1041.3	8.00346e+06	34.5387
343	2363				5.92462	374.136	1028.88	8.00486e+06	34.5448
344	2364				5.91262	369.674	1016.6	8.00624e+06	34.5508
345	2365				5.90062	365.264	1004.48	8.00761e+06	34.5567
346	2366				5.88862	360.907	992.494	8.00897e+06	34.5625
347	2367				5.87662	356.602	980.656	8.0103e+06	34.5683
348	2368				5.86462	352.348	968.958	8.01163e+06	34.574
349	2369				5.85262	348.145	957.4	8.01293e+06	34.5796
350	2370				5.84062	343.993	945.98	8.01422e+06	34.5852
351	2371				5.82862	339.889	934.696	8.0155e+06	34.5907
352	2372				5.81662	335.835	923.547	8.01676e+06	34.5961
353	2373				5.80462	331.829	912.53	8.018e+06	34.6015
354	2374				5.79262	327.871	901.645	8.01923e+06	34.6068
355	2375				5.78062	323.96	890.89	8.02044e+06	34.612
356	2376				5.76862	320.096	880.263	8.02164e+06	34.6172
357	2377				5.75662	316.278	869.763	8.02283e+06	34.6223
358	2378				5.74462	312.505	859.389	8.024e+06	34.6274
359	2379				5.73262	308.777	849.138	8.02516e+06	34.6324
360	2380				5.72062	305.094	839.009	8.0263e+06	34.6373
361	2381				5.70862	301.455	829.001	8.02744e+06	34.6422
362	2382				5.69662	297.859	819.112	8.02855e+06	34.647
363	2383				5.68462	294.306	809.342	8.02966e+06	34.6518
364	2384				5.67262	290.796	799.688	8.03075e+06	34.6565
365	2385				5.66062	287.327	790.149	8.03182e+06	34.6611
366	2386				5.64862	283.9	780.724	8.03289e+06	34.6657
367	2387				5.63662	280.513	771.411	8.03394e+06	34.6703
368	2388				5.62462	277.167	762.209	8.03498e+06	34.6748
369	2389				5.61262	273.861	753.118	8.03601e+06	34.6792
370	2390				5.60062	270.594	744.134	8.03702e+06	34.6836
371	2391				5.58862	267.366	735.258	8.03802e+06	34.6879
372	2392				5.57662	264.177	726.488	8.03901e+06	34.6922
373	2393				5.56462	261.026	717.822	8.03999e+06	34.6964
374	2394				5.55262	257.912	709.259	8.04096e+06	34.7006
375	2395				5.54062	254.836	700.799	8.04192e+06	34.7047
376	2396				5.52862	251.796	692.44	8.04286e+06	34.7088
377	2397				5.51662	248.793	684.18	8.04379e+06	34.7128
378	2398				5.50462	245.825	676.019	8.04472e+06	34.7168
379	2399				5.49262	242.893	667.955	8.04563e+06	34.7207
380	2400				5.48062	239.996	659.988	8.04653e+06	34.7246
381	2401				5.46862	237.133	652.115	8.04742e+06	34.7284
382	2402				5.45662	234.304	644.337	8.04829e+06	34.7322
383	2403				5.44462	231.509	636.651	8.04916e+06	34.736
384	2404				5.43262	228.748	629.057	8.05002e+06	34.7397
385	2405				5.42062	226.019	621.553	8.05087e+06	34.7433
386	2406				5.40862	223.323	614.139	8.05171e+06	34.7469
387	2407				5.39662	220.659	606.813	8.05253e+06	34.7505
388	2408				5.38462	218.027	599.575	8.05335e+06	34.754
389	2409				5.37262	215.427	592.423	8.05416e+06	34.7575
390	2410				5.36062	212.857	585.357	8.05496e+06	34.761
391	2411				5.34862	210.318	578.374	8.05574e+06	34.7644
392	2412				5.33662	207.809	571.475	8.05652e+06	34.7677
393	2413				5.32462	205.33	564.659	8.05729e+06	34.7711
394	2414				5.31262	202.881	557.923	8.05805e+06	34.7743
395	2415				5.30062	200.461	551.268	8.05881e+06	34.7776
396	2416				5.28862	198.07	544.692	8.05955e+06	34.7808
397	2417				5.27662	195.707	538.195	8.06028e+06	34.784
398	2418				5.26462	193.373	531.775	8.06101e+06	34.7871
399	2419				5.25262	191.066	525.432	8.06172e+06	34.7902
400	2420				5.24062	188.787	519.165	8.06243e+06	34.7932
401	2421				5.22862	186.535	512.972	8.06313e+06	34.7963
402	2422				5.21662	184.31	506.853	8.06382e+06	34.7992
403	2423				5.20462	182.112	500.807	8.06451e+06	34.8022
404	2424				5.19262	179.939	494.833	8.06518e+06	34.8051
405	2425				5.18062	177.793	488.931	8.06585e+06	34.808
406	2426				5.16862	175.672	483.099	8.06651e+06	34.8108
407	2427				5.15662	173.577	477.336	8.06716e+06	34.8136
408	2428				5.14462	171.506	471.642	8.0678e+06	34.8164
409	2429				5.13262	169.461	466.017	8.06844e+06	34.8191
410	2430				5.12062	167.439	460.458	8.06906e+06	34.8219
411	2431				5.10862	165.442	454.965	8.06968e+06	34.8245
412	2432				5.09662	163.469	449.538	8.0703e+06	34.8272
413	2433				5.08462	161.519	444.176	8.0709e+06	34.8298
414	2434				5.07262	159.592	438.878	8.0715e+06	34.8324
415	2435				5.06062	157.688	433.643	8.07209e+06	34.8349
416	2436				5.04862	155.807	428.47	8.07268e+06	34.8374
417	2437				5.03662	153.949	423.359	8.07325e+06	34.8399
418	2438				5.02462	152.112	418.309	8.07383e+06	34.8424
419	2439				5.01262	150.298	413.32	8.07439e+06	34.8448
420	2440				5.00062	148.505	408.389	8.07495e+06	34.8472
421	2441				4.98862	146.734	403.518	8.0755e+06	34.8496
422	2442				4.97662	144.984	398.705	8.07604e+06	34.852
423	2443				4.96462	143.254	393.949	8.07658e+06	34.8543
424	2444				4.95262	141.545	389.25	8.07711e+06	34.8566
425	2445				4.94062	139.857	384.607	8.07763e+06	34.8588
426	2446				4.92862	138.189	380.019	8.07815e+06	34.8611
427	2447				4.91662	136.54	375.486	8.07866e+06	34.8633
428	2448				4.90462	134.912	371.007	8.07917e+06	34.8655
429	2449				4.89262	133.302	366.582	8.07967e+06	34.8676
430	2450				4.88062	131.712	362.209	8.08016e+06	34.8697
431	2451				4.86862	130.141	357.888	8.08065e+06	34.8719
432	2452				4.85662	128.589	353.619	8.08113e+06	34.8739
433	2453				4.84462	127.055	349.401	8.08161e+06	34.876
434	2454				4.83262	125.539	345.234	8.08208e+06	34.878
435	2455				4.82062	124.042	341.116	8.08254e+06	34.88
436	2456				4.80862	122.562	337.047	8.083e+06	34.882
437	2457				4.79662	121.1	333.026	8.08346e+06	34.884
438	2458				4.78462	119.656	329.054	8.08391e+06	34.8859
439	2459				4.77262	118.229	325.129	8.08435e+06	34.8878
440	2460				4.76062	116.818	321.251	8.08479e+06	34.8897
441	2461				4.74862	115.425	317.419	8.08522e+06	34.8916
442	2462				4.73662	114.048	313.632	8.08565e+06	34.8934
443	2463				4.72462	112.688	309.891	8.08607e+06	34.8953
444	2464				4.71262	111.344	306.195	8.08649e+06	34.8971
445	2465				4.70062	110.015	302.542	8.0869e+06	34.8988
446	2466				4.68862	108.703	298.934	8.08731e+06	34.9006
447	2467				4.67662	107.406	295.368	8.08771e+06	34.9023
448	2468				4.66462	106.125	291.845	8.08811e+06	34.904
449	2469				4.65262	104.859	288.363	8.0885e+06	34.9057
450	2470				4.64062	103.609	284.924	8.08889e+06	34.9074
451	2471				4.62862	102.373	281.525	8.08928e+06	34.9091
452	2472				4.61662	101.152	278.167	8.08966e+06	34.9107
453	2473				4.60462	99.945	274.849	8.09003e+06	34.9123
454	2474				4.59262	98.7529	271.57	8.0904e+06	34.9139
455	2475				4.58062	97.5749	268.331	8.09077e+06	34.9155
456	2476				4.56862	96.411	265.13	8.09113e+06	34.9171
457	2477				4.55662	95.261	261.968	8.09148e+06	34.9186
458	2478				4.54462	94.1247	258.843	8.09184e+06	34.9201
459	2479				4.53262	93.0019	255.755	8.09219e+06	34.9216
460	2480				4.52062	91.8926	252.705	8.09253e+06	34.9231
461	2481				4.50862	90.7965	249.69	8.09287e+06	34.9246
462	2482				4.49662	89.7134	246.712	8.09321e+06	34.926
463	2483				4.48462	88.6433	243.769	8.09354e+06	34.9275
464	2484				4.47262	87.5859	240.861	8.09387e+06	34.9289
465	2485				4.46062	86.5412	237.988	8.09419e+06	34.9303
466	2486				4.44862	85.5089	235.149	8.09451e+06	34.9317
467	2487				4.43662	84.4889	232.345	8.09483e+06	34.9331
468	2488				4.42462	83.4811	229.573	8.09514e+06	34.9344
469	2489				4.41262	82.4853	226.835	8.09545e+06	34.9357
470	2490				4.40062	81.5014	224.129	8.09576e+06	34.9371
471	2491				4.38862	80.5292	221.455	8.09606e+06	34.9384
472	2492				4.37662	79.5687	218.814	8.09636e+06	34.9396
473	2493				4.36462	78.6195	216.204	8.09665e+06	34.9409
474	2494				4.35262	77.6818	213.625	8.09695e+06	34.9422
475	2495				4.34062	76.7551	211.077	8.09723e+06	34.9434
476	2496				4.32862	75.8396	208.559	8.09752e+06	34.9446
477	2497				4.31662	74.9349	206.071	8.0978e+06	34.9459
478	2498				4.30462	74.0411	203.613	8.09808e+06	34.9471
479	2499				4.29262	73.1579	201.184	8.09835e+06	34.9482
480	2500				4.28062	72.2853	198.784	8.09862e+06	34.9494
481	2501				4.26862	71.423	196.413	8.09889e+06	34.9506
482	2502				4.25662	70.5711	194.07	8.09915e+06	34.9517
483	2503				4.24462	69.7293	191.756	8.09942e+06	34.9528
484	2504				4.23262	68.8975	189.468	8.09967e+06	34.954
485	2505				4.22062	68.0757	187.208	8.09993e+06	34.9551
486	2506				4.20862	67.2637	184.975	8.10018e+06	34.9561
487	2507				4.19662	66.4613	182.769	8.10043e+06	34.9572
488	2508				4.18462	65.6686	180.589	8.10068e+06	34.9583
489	2509				4.17262	64.8853	178.434	8.10092e+06	34.9593
490	2510				4.16062	64.1113	176.306	8.10116e+06	34.9604
491	2511				4.14862	63.3465	174.203	8.1014e+06	34.9614
492	2512				4.13662	62.5909	172.125	8.10163e+06	34.9624
493	2513				4.12462	61.8443	170.072	8.10187e+06	34.9634
494	2514				4.11262	61.1066	168.043	8.10209e+06	34.9644
495	2515				4.10062	60.3777	166.039	8.10232e+06	34.9654
496	2516				4.08862	59.6575	164.058	8.10254e+06	34.9663
497	2517				4.07662	58.9459	162.101	8.10277e+06	34.9673
498	2518				4.06462	58.2428	160.168	8.10298e+06	34.9682
499	2519				4.05262	57.5481	158.257	8.1032e+06	34.9692
500	2520				4.04062	56.8616	156.369	8.10341e+06	34.9701
501	2521				4.02862	56.1833	154.504	8.10362e+06	34.971
502	2522				4.01662	55.5132	152.661	8.10383e+06	34.9719
503	2523				4.00462	54.851	150.84	8.10404e+06	34.9728
504	2524				3.99262	54.1967	149.041	8.10424e+06	34.9737
505	2525				3.98062	53.5502	147.263	8.10444e+06	34.9745
506	2526				3.96862	52.9115	145.507	8.10464e+06	34.9754
507	2527				3.95662	52.2803	143.771	8.10484e+06	34.9762
508	2528				3.94462	51.6567	142.056	8.10503e+06	34.9771
509	2529				3.93262	51.0405	140.362	8.10522e+06	34.9779
510	2530				3.92062	50.4317	138.687	8.10541e+06	34.9787
511	2531				3.90862	49.8302	137.033	8.1056e+06	34.9795
512	2532				3.89662	49.2358	135.398	8.10578e+06	34.9803
513	2533				3.88462	48.6485	133.783	8.10596e+06	34.9811
514	2534				3.87262	48.0682	132.187	8.10614e+06	34.9819
515	2535				3.86062	47.4948	130.611	8.10632e+06	34.9826
516	2536				3.84862	46.9283	129.053	8.1065e+06	34.9834
517	2537				3.83662	46.3685	127.513	8.10667e+06	34.9842
518	2538				3.82462	45.8154	125.992	8.10684e+06	34.9849
519	2539				3.81262	45.2689	124.489	8.10701e+06	34.9856
520	2540				3.80062	44.7289	123.005	8.10718e+06	34.9864
521	2541				3.78862	44.1954	121.537	8.10735e+06	34.9871
522	2542				3.77662	43.6682	120.088	8.10751e+06	34.9878
523	2543				3.76462	43.1473	118.655	8.10767e+06	34.9885
524	2544				3.75262	42.6326	117.24	8.10783e+06	34.9892
525	2545				3.74062	42.1241	115.841	8.10799e+06	34.9898
526	2546				3.72862	41.6216	114.46	8.10815e+06	34.9905
527	2547				3.71662	41.1252	113.094	8.1083e+06	34.9912
528	2548				3.70462	40.6346	111.745	8.10845e+06	34.9918
529	2549				3.69262	40.1499	110.412	8.1086e+06	34.9925
530	2550				3.68062	39.671	109.095	8.10875e+06	34.9931
531	2551				3.66862	39.1978	107.794	8.1089e+06	34.9938
532	2552				3.65662	38.7302	106.508	8.10904e+06	34.9944
533	2553				3.64462	38.2682	105.238	8.10919e+06	34.995
534	2554				3.63262	37.8118	103.982	8.10933e+06	34.9956
535	2555				3.62062	37.3607	102.742	8.10947e+06	34.9962
536	2556				3.60862	36.9151	101.516	8.10961e+06	34.9968
537	2557				3.59662	36.4748	100.306	8.10975e+06	34.9974
538	2558				3.58462	36.0397	99.1091	8.10988e+06	34.998
539	2559				3.57262	35.6098	97.9269	8.11001e+06	34.9986
540	2560				3.56062	35.185	96.7588	8.11015e+06	34.9991
541	2561				3.54862	34.7653	95.6046	8.11028e+06	34.9997
542	2562				3.53662	34.3506	94.4642	8.11041e+06	35.0003
543	2563				3.52462	33.9409	93.3374	8.11053e+06	35.0008
544	2564				3.51262	33.536	92.2241	8.11066e+06	35.0014
545	2565				3.50062	33.136	91.124	8.11078e+06	35.0019
546	2566				3.48862	32.7407	90.0371	8.11091e+06	35.0024
547	2567				3.47662	32.3502	88.9631	8.11103e+06	35.0029
548	2568				3.46462	31.9643	87.9019	8.11115e+06	35.0035
549	2569				3.45262	31.583	86.8534	8.11127e+06	35.004
550	2570				3.44062	31.2063	85.8174	8.11138e+06	35.0045
551	2571				3.42862	30.8341	84.7937	8.1115e+06	35.005
552	2572				3.41662	30.4663	83.7823	8.11161e+06	35.0055
553	2573				3.40462	30.1029	82.7829	8.11172e+06	35.006
554	2574				3.39262	29.7438	81.7954	8.11184e+06	35.0064
555	2575				3.38062	29.389	80.8197	8.11195e+06	35.0069
556	2576				3.36862	29.0384	79.8557	8.11206e+06	35.0074
557	2577				3.35662	28.6921	78.9032	8.11216e+06	35.0078
558	2578				3.34462	28.3498	77.962	8.11227e+06	35.0083
559	2579				3.33262	28.0116	77.032	8.11237e+06	35.0088
560	2580				3.32062	27.6775	76.1132	8.11248e+06	35.0092
561	2581				3.30862	27.3474	75.2053	8.11258e+06	35.0097
562	2582				3.29662	27.0212	74.3082	8.11268e+06	35.0101
563	2583				3.28462	26.6988	73.4218	8.11278e+06	35.0105
564	2584				3.27262	26.3804	72.546	8.11288e+06	35.0109
565	2585				3.26062	26.0657	71.6807	8.11298e+06	35.0114
566	2586				3.24862	25.7548	70.8257	8.11308e+06	35.0118
567	2587				3.23662	25.4476	69.9808	8.11317e+06	35.0122
568	2588				3.22462	25.144	69.1461	8.11327e+06	35.0126
569	2589				3.21262	24.8441	68.3213	8.11336e+06	35.013
570	2590				3.20062	24.5478	67.5063	8.11345e+06	35.0134
571	2591				3.18862	24.2549	66.7011	8.11354e+06	35.0138
572	2592				3.17662	23.9656	65.9055	8.11363e+06	35.0142
573	2593				3.16462	23.6798	65.1193	8.11372e+06	35.0146
574	2594				3.15262	23.3973	64.3426	8.11381e+06	35.0149
575	2595				3.14062	23.1182	63.5751	8.11389e+06	35.0153
576	2596				3.12862	22.8424	62.8167	8.11398e+06	35.0157
577	2597				3.11662	22.57	62.0674	8.11406e+06	35.0161
578	2598				3.10462	22.3008	61.3271	8.11415e+06	35.0164
579	2599				3.09262	22.0347	60.5955	8.11423e+06	35.0168
580	2600				3.08062	21.7719	59.8727	8.11431e+06	35.0171
581	2601				3.06862	21.5122	59.1586	8.11439e+06	35.0175
582	2602				3.05662	21.2556	58.4529	8.11447e+06	35.0178
583	2603				3.04462	21.0021	57.7557	8.11455e+06	35.0182
584	2604				3.03262	20.7515	57.0667	8.11463e+06	35.0185
585	2605				3.02062	20.504	56.386	8.11471e+06	35.0188
586	2606				3.00862	20.2594	55.7134	8.11478e+06	35.0192
587	2607				2.99662	20.0178	55.0489	8.11486e+06	35.0195
588	2608				2.98462	19.779	54.3922	8.11493e+06	35.0198
589	2609				2.97262	19.5431	53.7434	8.11501e+06	35.0201
590	2610				2.96062	19.3099	53.1024	8.11508e+06	35.0204
591	2611				2.94862	19.0796	52.4689	8.11515e+06	35.0207
592	2612				2.93662	18.852	51.8431	8.11522e+06	35.021
593	2613				2.92462	18.6272	51.2247	8.11529e+06	35.0213
594	2614				2.91262	18.405	50.6136	8.11536e+06	35.0216
595	2615				2.90062	18.1854	50.0099	8.11543e+06	35.0219
596	2616				2.88862	17.9685	49.4134	8.11549e+06	35.0222
597	2617				2.87662	17.7542	48.824	8.11556e+06	35.0225
598	2618				2.86462	17.5424	48.2416	8.11563e+06	35.0228
599	2619				2.85262	17.3331	47.6661	8.11569e+06	35.0231
600	2620				2.84062	17.1264	47.0976	8.11576e+06	35.0234
601	2621				2.82862	16.9221	46.5358	8.11582e+06	35.0236
602	2622				2.81662	16.7202	45.9807	8.11588e+06	35.0239
603	2623				2.80462	16.5208	45.4322	8.11594e+06	35.0242
604	2624				2.79262	16.3237	44.8903	8.11601e+06	35.0244
605	2625				2.78062	16.129	44.3548	8.11607e+06	35.0247
606	2626				2.76862	15.9366	43.8257	8.11613e+06	35.0249
607	2627				2.75662	15.7465	43.303	8.11618e+06	35.0252
608	2628				2.74462	15.5587	42.7864	8.11624e+06	35.0255
609	2629				2.73262	15.3731	42.2761	8.1163e+06	35.0257
610	2630				2.72062	15.1897	41.7718	8.11636e+06	35.0259
611	2631				2.70862	15.0086	41.2735	8.11641e+06	35.0262
612	2632				2.69662	14.8295	40.7812	8.11647e+06	35.0264
613	2633				2.68462	14.6526	40.2948	8.11652e+06	35.0267
614	2634				2.67262	14.4779	39.8141	8.11658e+06	35.0269
615	2635				2.66062	14.3052	39.3392	8.11663e+06	35.0271
616	2636				2.64862	14.1345	38.8699	8.11669e+06	35.0274
617	2637				2.63662	13.9659	38.4063	8.11674e+06	35.0276
618	2638				2.62462	13.7993	37.9482	8.11679e+06	35.0278
619	2639				2.61262	13.6347	37.4955	8.11684e+06	35.028
620	2640				2.60062	13.4721	37.0483	8.11689e+06	35.0283
621	2641				2.58862	13.3114	36.6063	8.11694e+06	35.0285
622	2642				2.57662	13.1526	36.1697	8.11699e+06	35.0287
623	2643				2.56462	12.9957	35.7382	8.11704e+06	35.0289
624	2644				2.55262	12.8407	35.3119	8.11709e+06	35.0291
625	2645				2.54062	12.6875	34.8907	8.11713e+06	35.0293
626	2646				2.52862	12.5362	34.4745	8.11718e+06	35.0295
627	2647				2.51662	12.3867	34.0633	8.11723e+06	35.0297
628	2648				2.50462	12.2389	33.657	8.11727e+06	35.0299
629	2649				2.49262	12.0929	33.2555	8.11732e+06	35.0301
630	2650				2.48062	11.9487	32.8589	8.11736e+06	35.0303
631	2651				2.46862	11.8061	32.4669	8.11741e+06	35.0305
632	2652				2.45662	11.6653	32.0796	8.11745e+06	35.0307
633	2653				2.44462	11.5262	31.697	8.1175e+06	35.0309
634	2654				2.43262	11.3887	31.3189	8.11754e+06	35.031
635	2655				2.42062	11.2528	30.9453	8.11758e+06	35.0312
636	2656				2.40862	11.1186	30.5762	8.11762e+06	35.0314
637	2657				2.39662	10.986	30.2115	8.11766e+06	35.0316
638	2658				2.38462	10.8549	29.8511	8.1177e+06	35.0318
639	2659				2.37262	10.7255	29.495	8.11774e+06	35.0319
640	2660				2.36062	10.5975	29.1432	8.11778e+06	35.0321
641	2661				2.34862	10.4711	28.7956	8.11782e+06	35.0323
642	2662				2.33662	10.3462	28.4521	8.11786e+06	35.0324
643	2663				2.32462	10.2228	28.1127	8.1179e+06	35.0326
644	2664				2.31262	10.1009	27.7774	8.11794e+06	35.0328
645	2665				2.30062	9.98037	27.446	8.11798e+06	35.0329
646	2666				2.28862	9.86132	27.1186	8.11801e+06	35.0331
647	2667				2.27662	9.74369	26.7952	8.11805e+06	35.0332
648	2668				2.26462	9.62747	26.4755	8.11809e+06	35.0334
649	2669				2.25262	9.51263	26.1597	8.11812e+06	35.0336
650	2670				2.24062	9.39916	25.8477	8.11816e+06	35.0337
651	2671				2.22862	9.28704	25.5394	8.11819e+06	35.0339
652	2672				2.21662	9.17627	25.2347	8.11823e+06	35.034
653	2673				2.20462	9.06681	24.9337	8.11826e+06	35.0342
654	2674				2.19262	8.95866	24.6363	8.11829e+06	35.0343
655	2675				2.18062	8.8518	24.3424	8.11833e+06	35.0344
656	2676				2.16862	8.74621	24.0521	8.11836e+06	35.0346
657	2677				2.15662	8.64188	23.7652	8.11839e+06	35.0347
658	2678				2.14462	8.5388	23.4817	8.11842e+06	35.0349
659	2679				2.13262	8.43695	23.2016	8.11845e+06	35.035
660	2680				2.12062	8.33631	22.9248	8.11849e+06	35.0351
661	2681				2.10862	8.23687	22.6514	8.11852e+06	35.0353
662	2682				2.09662	8.13862	22.3812	8.11855e+06	35.0354
663	2683				2.08462	8.04154	22.1142	8.11858e+06	35.0355
664	2684				2.07262	7.94562	21.8504	8.11861e+06	35.0357
665	2685				2.06062	7.85084	21.5898	8.11864e+06	35.0358
666	2686				2.04862	7.75719	21.3323	8.11867e+06	35.0359
667	2687				2.03662	7.66466	21.0778	8.11869e+06	35.036
668	2688				2.02462	7.57324	20.8264	8.11872e+06	35.0362
669	2689				2.01262	7.4829	20.578	8.11875e+06	35.0363
670	2690				2.00062	7.39364	20.3325	8.11878e+06	35.0364
671	2691				1.98862	7.30545	20.09	8.11881e+06	35.0365
672	2692				1.97662	7.21831	19.8503	8.11883e+06	35.0366
673	2693				1.96462	7.1322	19.6136	8.11886e+06	35.0367
674	2694				1.95262	7.04713	19.3796	8.11889e+06	35.0369
675	2695				1.94062	6.96307	19.1484	8.11891e+06	35.037
676	2696				1.92862	6.88001	18.92	8.11894e+06	35.0371
677	2697				1.91662	6.79795	18.6943	8.11896e+06	35.0372
678	2698				1.90462	6.71686	18.4714	8.11899e+06	35.0373
679	2699				1.89262	6.63674	18.251	8.11901e+06	35.0374
680	2700				1.88062	6.55757	18.0333	8.11904e+06	35.0375
681	2701				1.86862	6.47935	17.8182	8.11906e+06	35.0376
682	2702				1.85662	6.40206	17.6057	8.11909e+06	35.0377
683	2703				1.84462	6.3257	17.3957	8.11911e+06	35.0378
684	2704				1.83262	6.25024	17.1882	8.11913e+06	35.0379
685	2705				1.82062	6.17569	16.9831	8.11916e+06	35.038
686	2706				1.80862	6.10202	16.7806	8.11918e+06	35.0381
687	2707				1.79662	6.02924	16.5804	8.1192e+06	35.0382
688	2708				1.78462	5.95732	16.3826	8.11923e+06	35.0383
689	2709				1.77262	5.88626	16.1872	8.11925e+06	35.0384
690	2710				1.76062	5.81604	15.9941	8.11927e+06	35.0385
691	2711				1.74862	5.74667	15.8033	8.11929e+06	35.0386
692	2712				1.73662	5.67812	15.6148	8.11931e+06	35.0387
693	2713				1.72462	5.61039	15.4286	8.11933e+06	35.0388
694	2714				1.71262	5.54347	15.2445	8.11935e+06	35.0389
695	2715				1.70062	5.47734	15.0627	8.11937e+06	35.039
696	2716				1.68862	5.41201	14.883	8.11939e+06	35.0391
697	2717				1.67662	5.34745	14.7055	8.11941e+06	35.0391
698	2718				1.66462	5.28367	14.5301	8.11943e+06	35.0392
699	2719				1.65262	5.22064	14.3568	8.11945e+06	35.0393
700	2720				1.64062	5.15837	14.1855	8.11947e+06	35.0394

## Sheet: Switchgrass Fit High Rain
SUMMARY OUTPUT
Regression Statistics
Multiple R	1
R Square	1
Adjusted R Square	1
Standard Error	9.65803e-16
Observations	107
ANOVA
	df	SS	MS	F	Significance F
Regression	1	1062.02	1062.02	1.13856e+33	0
Residual	105	9.79415e-29	9.32776e-31
Total	106	1062.02
	Coefficients	Standard Error	t Stat	P-value	Lower 95%	Upper 95%	Lower 95.0%	Upper 95.0%
Intercept	217.534	6.27017e-15	3.46934e+16	0	217.534	217.534	217.534	217.534
X Variable 1	-0.102	3.02289e-18	-3.37425e+16	0	-0.102	-0.102	-0.102	-0.102
RESIDUAL OUTPUT
Observation	Predicted Y	Residuals
1	11.3917	3.01981e-14
2	11.2897	3.55271e-14
3	11.1877	1.06581e-14
4	11.0857	1.42109e-14
5	10.9837	1.77636e-14
6	10.8817	2.13163e-14
7	10.7797	2.4869e-14
8	10.6777	3.01981e-14
9	10.5757	3.37508e-14
10	10.4737	8.88178e-15
11	10.3717	1.24345e-14
12	10.2697	1.59872e-14
13	10.1677	1.95399e-14
14	10.0657	2.30926e-14
15	9.96366	2.84217e-14
16	9.86166	3.19744e-14
17	9.75966	7.10543e-15
18	9.65766	1.06581e-14
19	9.55566	1.59872e-14
20	9.45366	1.95399e-14
21	9.35166	2.30926e-14
22	9.24966	2.66454e-14
23	9.14766	3.01981e-14
24	9.04566	3.37508e-14
25	8.94366	1.06581e-14
26	8.84166	1.42109e-14
27	8.73966	1.77636e-14
28	8.63766	2.13163e-14
29	8.53566	2.4869e-14
30	8.43366	3.01981e-14
31	8.33166	3.37508e-14
32	8.22966	8.88178e-15
33	8.12766	1.24345e-14
34	8.02566	1.59872e-14
35	7.92366	2.04281e-14
36	7.82166	2.39808e-14
37	7.71966	2.75335e-14
38	7.61766	3.19744e-14
39	7.51566	3.55271e-14
40	7.41366	1.15463e-14
41	7.31166	1.5099e-14
42	7.20966	1.86517e-14
43	7.10766	2.30926e-14
44	7.00566	2.66454e-14
45	6.90366	3.10862e-14
46	6.80166	3.4639e-14
47	6.69966	9.76996e-15
48	6.59766	1.33227e-14
49	6.49566	1.77636e-14
50	6.39366	2.13163e-14
51	6.29166	2.4869e-14
52	6.18966	2.93099e-14
53	6.08766	3.28626e-14
54	5.98566	8.88178e-15
55	5.88366	1.24345e-14
56	5.78166	1.59872e-14
57	5.67966	2.04281e-14
58	5.57766	2.39808e-14
59	5.47566	2.75335e-14
60	5.37366	3.19744e-14
61	5.27166	3.55271e-14
62	5.16966	1.06581e-14
63	5.06766	1.5099e-14
64	4.96566	1.86517e-14
65	4.86366	2.30926e-14
66	4.76166	2.66454e-14
67	4.65966	3.01981e-14
68	4.55766	3.37508e-14
69	4.45566	9.76996e-15
70	4.35366	1.33227e-14
71	4.25166	1.77636e-14
72	4.14966	2.13163e-14
73	4.04766	2.57572e-14
74	3.94566	2.88658e-14
75	3.84366	3.24185e-14
76	3.74166	8.43769e-15
77	3.63966	1.24345e-14
78	3.53766	1.59872e-14
79	3.43566	1.95399e-14
80	3.33366	2.39808e-14
81	3.23166	2.79776e-14
82	3.12966	3.15303e-14
83	3.02766	3.55271e-14
84	2.92566	1.11022e-14
85	2.82366	1.5099e-14
86	2.72166	1.90958e-14
87	2.61966	2.26485e-14
88	2.51766	2.66454e-14
89	2.41566	3.01981e-14
90	2.31366	3.41949e-14
91	2.21166	9.76996e-15
92	2.10966	1.37668e-14
93	2.00766	1.73195e-14
94	1.90566	2.10942e-14
95	1.80366	2.5091e-14
96	1.70166	2.90878e-14
97	1.59966	3.30846e-14
98	1.49766	8.43769e-15
99	1.39566	1.22125e-14
100	1.29366	1.59872e-14
101	1.19166	1.9984e-14
102	1.08966	2.37588e-14
103	0.987664	2.76446e-14
104	0.885664	3.16414e-14
105	0.783664	3.56382e-14
106	0.681664	1.07692e-14
107	0.579664	1.46549e-14

## Sheet: Switchgrass k=0.102 High Rain
Total Waste in Place		23172413	tonnes
Total Degradable Waste		23172413	tonnes
Location		United States
Default Lo		140	m3/Mg
Default LandGem Model k		0.012
Years Since Landfill Closure	Year	CH4 emissions LandGEM (tonnes/yr)	CO2 emissions LandGEM (tonnes)	LandGem Ln(CH4)	Model Predicted Ln(CH4)	From Fit CH4 emissions LandGEM (tonnes/yr)	From Fit CO2 emissions LandGEM (tonnes/yr)	Cumulative Waste Decomposed (tonnes)	Percentage of Degradable Waste Placed That has Decomposed	Percentage of Total Waste Placed That has Decomposed
-33	1987	0				0	0	0	0
-32	1988	1703.46	4684.52			1703.46	4684.52	6387.98	0.0275672
-31	1989	3364.32	9251.87			3364.32	9251.87	19004.2	0.082012
-30	1990	4995.52	13737.7			4995.52	13737.7	37737.4	0.162855
-29	1991	6609.42	18175.9			6609.42	18175.9	62522.7	0.269815
-28	1992	8217.8	22598.9			8217.8	22598.9	93339.4	0.402804
-27	1993	9832.08	27038.2			9832.08	27038.2	130210	0.561917
-26	1994	11463.3	31524.2			11463.3	31524.2	173197	0.747429
-25	1995	13122.4	36086.6			13122.4	36086.6	222406	0.959789
-24	1996	14820	40755			14820	40755	277981	1.19962
-23	1997	16566.7	45558.4			16566.7	45558.4	340106	1.46772
-22	1998	18271	50245.3			18271	50245.3	408623	1.7634
-21	1999	19938.2	54830.1			19938.2	54830.1	483391	2.08606
-20	2000	21379.6	58793.9			21379.6	58793.9	563564	2.43205
-19	2001	22836.8	62801.1			22836.8	62801.1	649202	2.80162
-18	2002	25035.6	68848			25035.6	68848	743086	3.20677
-17	2003	27208.4	74823.2			27208.4	74823.2	845117	3.64708
-16	2004	30020.2	82555.5			30020.2	82555.5	957693	4.1329
-15	2005	32861.2	90368.4			32861.2	90368.4	1.08092e+06	4.6647
-14	2006	36378.6	100041			36378.6	100041	1.21734e+06	5.25341
-13	2007	40190.5	110524			40190.5	110524	1.36806e+06	5.90382
-12	2008	44362.3	121996			44362.3	121996	1.53442e+06	6.62173
-11	2009	49414.7	135890			49414.7	135890	1.71972e+06	7.42141
-10	2010	53271.2	146496			53271.2	146496	1.91949e+06	8.2835
-9	2011	56924.5	156542			56924.5	156542	2.13295e+06	9.20471
-8	2012	59283.3	163029			59283.3	163029	2.35527e+06	10.1641
-7	2013	62089.9	170747			62089.9	170747	2.5881e+06	11.1689
-6	2014	68889.3	189446			68889.3	189446	2.84644e+06	12.2837
-5	2015	73130.7	201110			73130.7	201110	3.12068e+06	13.4672
-4	2016	76710.5	210954			76710.5	210954	3.40834e+06	14.7086
-3	2017	79168	217712			79168	217712	3.70522e+06	15.9898
-2	2018	84556.3	232530			84556.3	232530	4.02231e+06	17.3582
-1	2019	91193.2	250781			91193.2	250781	4.36428e+06	18.834
0	2020	98092.3	269754			98092.3	269754	4.73213e+06	20.4214
1	2021	88580.3		11.3917	11.3917	88580.3	243596	5.06431e+06	21.8549
2	2022	79990.6		11.2897	11.2897	79990.6	219974	5.36427e+06	23.1494
3	2023	72233.9		11.1877	11.1877	72233.9	198643	5.63515e+06	24.3183
4	2024	65229.3		11.0857	11.0857	65229.3	179381	5.87976e+06	25.374
5	2025	58904		10.9837	10.9837	58904	161986	6.10065e+06	26.3272
6	2026	53192.1		10.8817	10.8817	53192.1	146278	6.30012e+06	27.188
7	2027	48034		10.7797	10.7797	48034	132093	6.48025e+06	27.9653
8	2028	43376.1		10.6777	10.6777	43376.1	119284	6.64291e+06	28.6673
9	2029	39169.9		10.5757	10.5757	39169.9	107717	6.78979e+06	29.3012
10	2030	35371.6		10.4737	10.4737	35371.6	97271.9	6.92244e+06	29.8736
11	2031	31941.6		10.3717	10.3717	31941.6	87839.4	7.04222e+06	30.3905
12	2032	28844.2		10.2697	10.2697	28844.2	79321.6	7.15038e+06	30.8573
13	2033	26047.2		10.1677	10.1677	26047.2	71629.7	7.24806e+06	31.2788
14	2034	23521.4		10.0657	10.0657	23521.4	64683.7	7.33626e+06	31.6595
15	2035	21240.5		9.96366	9.96366	21240.5	58411.3	7.41592e+06	32.0032
16	2036	19180.8		9.86166	9.86166	19180.8	52747.2	7.48784e+06	32.3136
17	2037	17320.8		9.75966	9.75966	17320.8	47632.2	7.5528e+06	32.5939
18	2038	15641.2		9.65766	9.65766	15641.2	43013.3	7.61145e+06	32.847
19	2039	14124.5		9.55566	9.55566	14124.5	38842.3	7.66442e+06	33.0756
20	2040	12754.8		9.45366	9.45366	12754.8	35075.7	7.71225e+06	33.282
21	2041	11518		9.35166	9.35166	11518	31674.4	7.75544e+06	33.4684
22	2042	10401.1		9.24966	9.24966	10401.1	28603	7.79445e+06	33.6367
23	2043	9392.48		9.14766	9.14766	9392.48	25829.3	7.82967e+06	33.7887
24	2044	8481.68		9.04566	9.04566	8481.68	23324.6	7.86147e+06	33.926
25	2045	7659.21		8.94366	8.94366	7659.21	21062.8	7.8902e+06	34.05
26	2046	6916.49		8.84166	8.84166	6916.49	19020.4	7.91613e+06	34.1619
27	2047	6245.8		8.73966	8.73966	6245.8	17175.9	7.93955e+06	34.263
28	2048	5640.14		8.63766	8.63766	5640.14	15510.4	7.96071e+06	34.3542
29	2049	5093.21		8.53566	8.53566	5093.21	14006.3	7.9798e+06	34.4367
30	2050	4599.32		8.43366	8.43366	4599.32	12648.1	7.99705e+06	34.5111
31	2051	4153.32		8.33166	8.33166	4153.32	11421.6	8.01263e+06	34.5783
32	2052	3750.57		8.22966	8.22966	3750.57	10314.1	8.02669e+06	34.639
33	2053	3386.88		8.12766	8.12766	3386.88	9313.92	8.03939e+06	34.6938
34	2054	3058.45		8.02566	8.02566	3058.45	8410.74	8.05086e+06	34.7433
35	2055	2761.87		7.92366	7.92366	2761.87	7595.15	8.06122e+06	34.788
36	2056	2494.05		7.82166	7.82166	2494.05	6858.65	8.07057e+06	34.8284
37	2057	2252.2		7.71966	7.71966	2252.2	6193.56	8.07902e+06	34.8648
38	2058	2033.81		7.61766	7.61766	2033.81	5592.97	8.08664e+06	34.8977
39	2059	1836.59		7.51566	7.51566	1836.59	5050.61	8.09353e+06	34.9274
40	2060	1658.49		7.41366	7.41366	1658.49	4560.85	8.09975e+06	34.9543
41	2061	1497.67		7.31166	7.31166	1497.67	4118.59	8.10537e+06	34.9785
42	2062	1352.44		7.20966	7.20966	1352.44	3719.2	8.11044e+06	35.0004
43	2063	1221.29		7.10766	7.10766	1221.29	3358.55	8.11502e+06	35.0202
44	2064	1102.86		7.00566	7.00566	1102.86	3032.87	8.11915e+06	35.038
45	2065	995.917		6.90366	6.90366	995.917	2738.77	8.12289e+06	35.0541
46	2066	899.343		6.80166	6.80166	899.343	2473.19	8.12626e+06	35.0687
47	2067	812.133		6.69966	6.69966	812.133	2233.37	8.12931e+06	35.0818
48	2068	733.38		6.59766	6.59766	733.38	2016.8	8.13206e+06	35.0937
49	2069	662.264		6.49566	6.49566	662.264	1821.23	8.13454e+06	35.1044
50	2070	598.044		6.39366	6.39366	598.044	1644.62	8.13678e+06	35.1141
51	2071	540.051		6.29166	6.29166	540.051	1485.14	8.13881e+06	35.1228
52	2072	487.682		6.18966	6.18966	487.682	1341.13	8.14064e+06	35.1307
53	2073	440.392		6.08766	6.08766	440.392	1211.08	8.14229e+06	35.1379
54	2074	397.687		5.98566	5.98566	397.687	1093.64	8.14378e+06	35.1443
55	2075	359.123		5.88366	5.88366	359.123	987.588	8.14513e+06	35.1501
56	2076	324.298		5.78166	5.78166	324.298	891.821	8.14634e+06	35.1554
57	2077	292.851		5.67966	5.67966	292.851	805.341	8.14744e+06	35.1601
58	2078	264.453		5.57766	5.57766	264.453	727.246	8.14843e+06	35.1644
59	2079	238.809		5.47566	5.47566	238.809	656.725	8.14933e+06	35.1682
60	2080	215.652		5.37366	5.37366	215.652	593.042	8.15014e+06	35.1717
61	2081	194.74		5.27166	5.27166	194.74	535.534	8.15087e+06	35.1749
62	2082	175.856		5.16966	5.16966	175.856	483.603	8.15153e+06	35.1777
63	2083	158.803		5.06766	5.06766	158.803	436.708	8.15212e+06	35.1803
64	2084	143.404		4.96566	4.96566	143.404	394.36	8.15266e+06	35.1826
65	2085	129.498		4.86366	4.86366	129.498	356.119	8.15315e+06	35.1847
66	2086	116.94		4.76166	4.76166	116.94	321.586	8.15358e+06	35.1866
67	2087	105.601		4.65966	4.65966	105.601	290.402	8.15398e+06	35.1883
68	2088	95.3605		4.55766	4.55766	95.3605	262.241	8.15434e+06	35.1899
69	2089	86.1133		4.45566	4.45566	86.1133	236.812	8.15466e+06	35.1912
70	2090	77.7629		4.35366	4.35366	77.7629	213.848	8.15495e+06	35.1925
71	2091	70.2222		4.25166	4.25166	70.2222	193.111	8.15522e+06	35.1936
72	2092	63.4127		4.14966	4.14966	63.4127	174.385	8.15545e+06	35.1947
73	2093	57.2635		4.04766	4.04766	57.2635	157.475	8.15567e+06	35.1956
74	2094	51.7107		3.94566	3.94566	51.7107	142.204	8.15586e+06	35.1964
75	2095	46.6963		3.84366	3.84366	46.6963	128.415	8.15604e+06	35.1972
76	2096	42.1681		3.74166	3.74166	42.1681	115.962	8.1562e+06	35.1979
77	2097	38.0791		3.63966	3.63966	38.0791	104.717	8.15634e+06	35.1985
78	2098	34.3865		3.53766	3.53766	34.3865	94.5629	8.15647e+06	35.199
79	2099	31.052		3.43566	3.43566	31.052	85.3931	8.15658e+06	35.1995
80	2100	28.0409		3.33366	3.33366	28.0409	77.1125	8.15669e+06	35.2
81	2101	25.3218		3.23166	3.23166	25.3218	69.6349	8.15678e+06	35.2004
82	2102	22.8663		3.12966	3.12966	22.8663	62.8823	8.15687e+06	35.2008
83	2103	20.6489		3.02766	3.02766	20.6489	56.7846	8.15695e+06	35.2011
84	2104	18.6466		2.92566	2.92566	18.6466	51.2782	8.15702e+06	35.2014
85	2105	16.8384		2.82366	2.82366	16.8384	46.3057	8.15708e+06	35.2017
86	2106	15.2056		2.72166	2.72166	15.2056	41.8154	8.15714e+06	35.2019
87	2107	13.7311		2.61966	2.61966	13.7311	37.7606	8.15719e+06	35.2022
88	2108	12.3996		2.51766	2.51766	12.3996	34.0989	8.15723e+06	35.2024
89	2109	11.1972		2.41566	2.41566	11.1972	30.7923	8.15728e+06	35.2025
90	2110	10.1114		2.31366	2.31366	10.1114	27.8064	8.15731e+06	35.2027
91	2111	9.1309		2.21166	2.21166	9.1309	25.11	8.15735e+06	35.2028
92	2112	8.24547		2.10966	2.10966	8.24547	22.675	8.15738e+06	35.203
93	2113	7.44591		2.00766	2.00766	7.44591	20.4762	8.15741e+06	35.2031
94	2114	6.72387		1.90566	1.90566	6.72387	18.4906	8.15743e+06	35.2032
95	2115	6.07186		1.80366	1.80366	6.07186	16.6976	8.15746e+06	35.2033
96	2116	5.48307		1.70166	1.70166	5.48307	15.0784	8.15748e+06	35.2034
97	2117	4.95137		1.59966	1.59966	4.95137	13.6163	8.1575e+06	35.2035
98	2118	4.47123		1.49766	1.49766	4.47123	12.2959	8.15751e+06	35.2035
99	2119	4.03766		1.39566	1.39566	4.03766	11.1036	8.15753e+06	35.2036
100	2120	3.64612		1.29366	1.29366	3.64612	10.0268	8.15754e+06	35.2037
101	2121	3.29256		1.19166	1.19166	3.29256	9.05453	8.15755e+06	35.2037
102	2122	2.97328		1.08966	1.08966	2.97328	8.17651	8.15756e+06	35.2038
103	2123	2.68496		0.987664	0.987664	2.68496	7.38363	8.15757e+06	35.2038
104	2124	2.42459		0.885664	0.885664	2.42459	6.66763	8.15758e+06	35.2039
105	2125	2.18948		0.783664	0.783664	2.18948	6.02107	8.15759e+06	35.2039
106	2126	1.97717		0.681664	0.681664	1.97717	5.43721	8.1576e+06	35.2039
107	2127	1.78544		0.579664	0.579664	1.78544	4.90996	8.15761e+06	35.204
108	2128				0.477664	1.6123	4.43384	8.15761e+06	35.204
109	2129				0.375664	1.45596	4.00389	8.15762e+06	35.204
110	2130				0.273664	1.31477	3.61563	8.15762e+06	35.204
111	2131				0.171664	1.18728	3.26502	8.15763e+06	35.204
112	2132				0.0696643	1.07215	2.94841	8.15763e+06	35.2041
113	2133				-0.0323357	0.968181	2.6625	8.15763e+06	35.2041
114	2134				-0.134336	0.874296	2.40432	8.15764e+06	35.2041
115	2135				-0.236336	0.789516	2.17117	8.15764e+06	35.2041
116	2136				-0.338336	0.712956	1.96063	8.15764e+06	35.2041
117	2137				-0.440336	0.64382	1.77051	8.15765e+06	35.2041
118	2138				-0.542336	0.581389	1.59882	8.15765e+06	35.2041
119	2139				-0.644336	0.525011	1.44378	8.15765e+06	35.2041
120	2140				-0.746336	0.474101	1.30378	8.15765e+06	35.2042
121	2141				-0.848336	0.428127	1.17735	8.15765e+06	35.2042
122	2142				-0.950336	0.386611	1.06318	8.15765e+06	35.2042
123	2143				-1.05234	0.349121	0.960084	8.15766e+06	35.2042
124	2144				-1.15434	0.315267	0.866984	8.15766e+06	35.2042
125	2145				-1.25634	0.284695	0.782912	8.15766e+06	35.2042
126	2146				-1.35834	0.257088	0.706993	8.15766e+06	35.2042
127	2147				-1.46034	0.232158	0.638435	8.15766e+06	35.2042
128	2148				-1.56234	0.209646	0.576526	8.15766e+06	35.2042
129	2149				-1.66434	0.189316	0.52062	8.15766e+06	35.2042
130	2150				-1.76634	0.170958	0.470135	8.15766e+06	35.2042
131	2151				-1.86834	0.15438	0.424546	8.15766e+06	35.2042
132	2152				-1.97034	0.13941	0.383378	8.15766e+06	35.2042
133	2153				-2.07234	0.125891	0.346201	8.15766e+06	35.2042
134	2154				-2.17434	0.113684	0.31263	8.15766e+06	35.2042
135	2155				-2.27634	0.10266	0.282314	8.15766e+06	35.2042
136	2156				-2.37834	0.0927047	0.254938	8.15766e+06	35.2042
137	2157				-2.48034	0.0837151	0.230217	8.15767e+06	35.2042
138	2158				-2.58234	0.0755972	0.207892	8.15767e+06	35.2042
139	2159				-2.68434	0.0682665	0.187733	8.15767e+06	35.2042
140	2160				-2.78634	0.0616467	0.169528	8.15767e+06	35.2042
141	2161				-2.88834	0.0556688	0.153089	8.15767e+06	35.2042
142	2162				-2.99034	0.0502706	0.138244	8.15767e+06	35.2042
143	2163				-3.09234	0.0453958	0.124838	8.15767e+06	35.2042
144	2164				-3.19434	0.0409937	0.112733	8.15767e+06	35.2042
145	2165				-3.29634	0.0370186	0.101801	8.15767e+06	35.2042
146	2166				-3.39834	0.0334289	0.0919294	8.15767e+06	35.2042
147	2167				-3.50034	0.0301872	0.0830149	8.15767e+06	35.2042
148	2168				-3.60234	0.02726	0.0749649	8.15767e+06	35.2042
149	2169				-3.70434	0.0246166	0.0676956	8.15767e+06	35.2042
150	2170				-3.80634	0.0222295	0.0611311	8.15767e+06	35.2042
151	2171				-3.90834	0.0200739	0.0552032	8.15767e+06	35.2042
152	2172				-4.01034	0.0181273	0.0498501	8.15767e+06	35.2042
153	2173				-4.11234	0.0163695	0.0450161	8.15767e+06	35.2042
154	2174				-4.21434	0.0147821	0.0406509	8.15767e+06	35.2042
155	2175				-4.31634	0.0133487	0.0367089	8.15767e+06	35.2042
156	2176				-4.41834	0.0120543	0.0331493	8.15767e+06	35.2042
157	2177				-4.52034	0.0108854	0.0299348	8.15767e+06	35.2042
158	2178				-4.62234	0.00982981	0.027032	8.15767e+06	35.2042
159	2179				-4.72434	0.00887661	0.0244107	8.15767e+06	35.2042
160	2180				-4.82634	0.00801584	0.0220436	8.15767e+06	35.2042
161	2181				-4.92834	0.00723854	0.019906	8.15767e+06	35.2042
162	2182				-5.03034	0.00653662	0.0179757	8.15767e+06	35.2042
163	2183				-5.13234	0.00590276	0.0162326	8.15767e+06	35.2042
164	2184				-5.23434	0.00533036	0.0146585	8.15767e+06	35.2042
165	2185				-5.33634	0.00481348	0.0132371	8.15767e+06	35.2042
166	2186				-5.43834	0.00434671	0.0119535	8.15767e+06	35.2042
167	2187				-5.54034	0.00392521	0.0107943	8.15767e+06	35.2042
168	2188				-5.64234	0.00354458	0.00974759	8.15767e+06	35.2042
169	2189				-5.74434	0.00320086	0.00880237	8.15767e+06	35.2042
170	2190				-5.84634	0.00289047	0.0079488	8.15767e+06	35.2042
171	2191				-5.94834	0.00261018	0.007178	8.15767e+06	35.2042
172	2192				-6.05034	0.00235707	0.00648194	8.15767e+06	35.2042
173	2193				-6.15234	0.0021285	0.00585339	8.15767e+06	35.2042
174	2194				-6.25434	0.0019221	0.00528578	8.15767e+06	35.2042
175	2195				-6.35634	0.00173572	0.00477322	8.15767e+06	35.2042
176	2196				-6.45834	0.0015674	0.00431036	8.15767e+06	35.2042
177	2197				-6.56034	0.00141541	0.00389238	8.15767e+06	35.2042
178	2198				-6.66234	0.00127816	0.00351493	8.15767e+06	35.2042
179	2199				-6.76434	0.00115421	0.00317409	8.15767e+06	35.2042
180	2200				-6.86634	0.00104229	0.0028663	8.15767e+06	35.2042
181	2201				-6.96834	0.000941218	0.00258835	8.15767e+06	35.2042
182	2202				-7.07034	0.000849948	0.00233736	8.15767e+06	35.2042
183	2203				-7.17234	0.000767528	0.0021107	8.15767e+06	35.2042
184	2204				-7.27434	0.0006931	0.00190603	8.15767e+06	35.2042
185	2205				-7.37634	0.00062589	0.0017212	8.15767e+06	35.2042
186	2206				-7.47834	0.000565197	0.00155429	8.15767e+06	35.2042
187	2207				-7.58034	0.00051039	0.00140357	8.15767e+06	35.2042
188	2208				-7.68234	0.000460897	0.00126747	8.15767e+06	35.2042
189	2209				-7.78434	0.000416204	0.00114456	8.15767e+06	35.2042
190	2210				-7.88634	0.000375844	0.00103357	8.15767e+06	35.2042
191	2211				-7.98834	0.000339398	0.000933346	8.15767e+06	35.2042
192	2212				-8.09034	0.000306487	0.000842839	8.15767e+06	35.2042
193	2213				-8.19234	0.000276767	0.000761108	8.15767e+06	35.2042
194	2214				-8.29434	0.000249928	0.000687303	8.15767e+06	35.2042
195	2215				-8.39634	0.000225693	0.000620655	8.15767e+06	35.2042
196	2216				-8.49834	0.000203807	0.00056047	8.15767e+06	35.2042
197	2217				-8.60034	0.000184044	0.000506121	8.15767e+06	35.2042
198	2218				-8.70234	0.000166197	0.000457042	8.15767e+06	35.2042
199	2219				-8.80434	0.000150081	0.000412723	8.15767e+06	35.2042
200	2220				-8.90634	0.000135528	0.000372701	8.15767e+06	35.2042
201	2221				-9.00834	0.000122385	0.00033656	8.15767e+06	35.2042
202	2222				-9.11034	0.000110518	0.000303923	8.15767e+06	35.2042
203	2223				-9.21234	9.98007e-05	0.000274452	8.15767e+06	35.2042
204	2224				-9.31434	9.01229e-05	0.000247838	8.15767e+06	35.2042
205	2225				-9.41634	8.13837e-05	0.000223805	8.15767e+06	35.2042
206	2226				-9.51834	7.34919e-05	0.000202103	8.15767e+06	35.2042
207	2227				-9.62034	6.63653e-05	0.000182505	8.15767e+06	35.2042
208	2228				-9.72234	5.99299e-05	0.000164807	8.15767e+06	35.2042
209	2229				-9.82434	5.41184e-05	0.000148826	8.15767e+06	35.2042
210	2230				-9.92634	4.88705e-05	0.000134394	8.15767e+06	35.2042
211	2231				-10.0283	4.41315e-05	0.000121362	8.15767e+06	35.2042
212	2232				-10.1303	3.98521e-05	0.000109593	8.15767e+06	35.2042
213	2233				-10.2323	3.59876e-05	9.89659e-05	8.15767e+06	35.2042
214	2234				-10.3343	3.24979e-05	8.93692e-05	8.15767e+06	35.2042
215	2235				-10.4363	2.93465e-05	8.0703e-05	8.15767e+06	35.2042
216	2236				-10.5383	2.65008e-05	7.28772e-05	8.15767e+06	35.2042
217	2237				-10.6403	2.3931e-05	6.58103e-05	8.15767e+06	35.2042
218	2238				-10.7423	2.16104e-05	5.94286e-05	8.15767e+06	35.2042
219	2239				-10.8443	1.95148e-05	5.36658e-05	8.15767e+06	35.2042
220	2240				-10.9463	1.76225e-05	4.84618e-05	8.15767e+06	35.2042
221	2241				-11.0483	1.59136e-05	4.37624e-05	8.15767e+06	35.2042
222	2242				-11.1503	1.43705e-05	3.95188e-05	8.15767e+06	35.2042
223	2243				-11.2523	1.2977e-05	3.56866e-05	8.15767e+06	35.2042
224	2244				-11.3543	1.17186e-05	3.22261e-05	8.15767e+06	35.2042
225	2245				-11.4563	1.05822e-05	2.91011e-05	8.15767e+06	35.2042
226	2246				-11.5583	9.55605e-06	2.62791e-05	8.15767e+06	35.2042
227	2247				-11.6603	8.6294e-06	2.37308e-05	8.15767e+06	35.2042
228	2248				-11.7623	7.7926e-06	2.14297e-05	8.15767e+06	35.2042
229	2249				-11.8643	7.03695e-06	1.93516e-05	8.15767e+06	35.2042
230	2250				-11.9663	6.35457e-06	1.74751e-05	8.15767e+06	35.2042
231	2251				-12.0683	5.73837e-06	1.57805e-05	8.15767e+06	35.2042
232	2252				-12.1703	5.18192e-06	1.42503e-05	8.15767e+06	35.2042
233	2253				-12.2723	4.67942e-06	1.28684e-05	8.15767e+06	35.2042
234	2254				-12.3743	4.22566e-06	1.16206e-05	8.15767e+06	35.2042
235	2255				-12.4763	3.81589e-06	1.04937e-05	8.15767e+06	35.2042
236	2256				-12.5783	3.44586e-06	9.47613e-06	8.15767e+06	35.2042
237	2257				-12.6803	3.11172e-06	8.55722e-06	8.15767e+06	35.2042
238	2258				-12.7823	2.80997e-06	7.72743e-06	8.15767e+06	35.2042
239	2259				-12.8843	2.53749e-06	6.97809e-06	8.15767e+06	35.2042
240	2260				-12.9863	2.29143e-06	6.30142e-06	8.15767e+06	35.2042
241	2261				-13.0883	2.06923e-06	5.69037e-06	8.15767e+06	35.2042
242	2262				-13.1903	1.86857e-06	5.13857e-06	8.15767e+06	35.2042
243	2263				-13.2923	1.68738e-06	4.64028e-06	8.15767e+06	35.2042
244	2264				-13.3943	1.52375e-06	4.19031e-06	8.15767e+06	35.2042
245	2265				-13.4963	1.37599e-06	3.78398e-06	8.15767e+06	35.2042
246	2266				-13.5983	1.24256e-06	3.41704e-06	8.15767e+06	35.2042
247	2267				-13.7003	1.12207e-06	3.08569e-06	8.15767e+06	35.2042
248	2268				-13.8023	1.01326e-06	2.78647e-06	8.15767e+06	35.2042
249	2269				-13.9043	9.15006e-07	2.51627e-06	8.15767e+06	35.2042
250	2270				-14.0063	8.26277e-07	2.27226e-06	8.15767e+06	35.2042
251	2271				-14.1083	7.46153e-07	2.05192e-06	8.15767e+06	35.2042
252	2272				-14.2103	6.73798e-07	1.85294e-06	8.15767e+06	35.2042
253	2273				-14.3123	6.08459e-07	1.67326e-06	8.15767e+06	35.2042
254	2274				-14.4143	5.49457e-07	1.51101e-06	8.15767e+06	35.2042
255	2275				-14.5163	4.96176e-07	1.36448e-06	8.15767e+06	35.2042
256	2276				-14.6183	4.48061e-07	1.23217e-06	8.15767e+06	35.2042
257	2277				-14.7203	4.04613e-07	1.11268e-06	8.15767e+06	35.2042
258	2278				-14.8223	3.65377e-07	1.00479e-06	8.15767e+06	35.2042
259	2279				-14.9243	3.29946e-07	9.07353e-07	8.15767e+06	35.2042
260	2280				-15.0263	2.97951e-07	8.19366e-07	8.15767e+06	35.2042
261	2281				-15.1283	2.69059e-07	7.39912e-07	8.15767e+06	35.2042
262	2282				-15.2303	2.42968e-07	6.68162e-07	8.15767e+06	35.2042
263	2283				-15.3323	2.19407e-07	6.0337e-07	8.15767e+06	35.2042
264	2284				-15.4343	1.98131e-07	5.44861e-07	8.15767e+06	35.2042
265	2285				-15.5363	1.78918e-07	4.92026e-07	8.15767e+06	35.2042
266	2286				-15.6383	1.61569e-07	4.44314e-07	8.15767e+06	35.2042
267	2287				-15.7403	1.45901e-07	4.01228e-07	8.15767e+06	35.2042
268	2288				-15.8423	1.31753e-07	3.62321e-07	8.15767e+06	35.2042
269	2289				-15.9443	1.18977e-07	3.27187e-07	8.15767e+06	35.2042
270	2290				-16.0463	1.0744e-07	2.95459e-07	8.15767e+06	35.2042
271	2291				-16.1483	9.70213e-08	2.66808e-07	8.15767e+06	35.2042
272	2292				-16.2503	8.76131e-08	2.40936e-07	8.15767e+06	35.2042
273	2293				-16.3523	7.91172e-08	2.17572e-07	8.15767e+06	35.2042
274	2294				-16.4543	7.14452e-08	1.96474e-07	8.15767e+06	35.2042
275	2295				-16.5563	6.45171e-08	1.77422e-07	8.15767e+06	35.2042
276	2296				-16.6583	5.82608e-08	1.60217e-07	8.15767e+06	35.2042
277	2297				-16.7603	5.26113e-08	1.44681e-07	8.15767e+06	35.2042
278	2298				-16.8623	4.75095e-08	1.30651e-07	8.15767e+06	35.2042
279	2299				-16.9643	4.29025e-08	1.17982e-07	8.15767e+06	35.2042
280	2300				-17.0663	3.87422e-08	1.06541e-07	8.15767e+06	35.2042
281	2301				-17.1683	3.49854e-08	9.62098e-08	8.15767e+06	35.2042
282	2302				-17.2703	3.15928e-08	8.68803e-08	8.15767e+06	35.2042
283	2303				-17.3723	2.85293e-08	7.84555e-08	8.15767e+06	35.2042
284	2304				-17.4743	2.57628e-08	7.08476e-08	8.15767e+06	35.2042
285	2305				-17.5763	2.32645e-08	6.39775e-08	8.15767e+06	35.2042
286	2306				-17.6783	2.10086e-08	5.77735e-08	8.15767e+06	35.2042
287	2307				-17.7803	1.89714e-08	5.21712e-08	8.15767e+06	35.2042
288	2308				-17.8823	1.71317e-08	4.71122e-08	8.15767e+06	35.2042
289	2309				-17.9843	1.54704e-08	4.25437e-08	8.15767e+06	35.2042
290	2310				-18.0863	1.39703e-08	3.84182e-08	8.15767e+06	35.2042
291	2311				-18.1883	1.26155e-08	3.46928e-08	8.15767e+06	35.2042
292	2312				-18.2903	1.13922e-08	3.13286e-08	8.15767e+06	35.2042
293	2313				-18.3923	1.02875e-08	2.82906e-08	8.15767e+06	35.2042
294	2314				-18.4943	9.28992e-09	2.55473e-08	8.15767e+06	35.2042
295	2315				-18.5963	8.38907e-09	2.307e-08	8.15767e+06	35.2042
296	2316				-18.6983	7.57558e-09	2.08328e-08	8.15767e+06	35.2042
297	2317				-18.8003	6.84097e-09	1.88127e-08	8.15767e+06	35.2042
298	2318				-18.9023	6.1776e-09	1.69884e-08	8.15767e+06	35.2042
299	2319				-19.0043	5.57856e-09	1.5341e-08	8.15767e+06	35.2042
300	2320				-19.1063	5.0376e-09	1.38534e-08	8.15767e+06	35.2042
301	2321				-19.2083	4.5491e-09	1.251e-08	8.15767e+06	35.2042
302	2322				-19.3103	4.10797e-09	1.12969e-08	8.15767e+06	35.2042
303	2323				-19.4123	3.70962e-09	1.02015e-08	8.15767e+06	35.2042
304	2324				-19.5143	3.3499e-09	9.21222e-09	8.15767e+06	35.2042
305	2325				-19.6163	3.02506e-09	8.31891e-09	8.15767e+06	35.2042
306	2326				-19.7183	2.73172e-09	7.51222e-09	8.15767e+06	35.2042
307	2327				-19.8203	2.46682e-09	6.78376e-09	8.15767e+06	35.2042
308	2328				-19.9223	2.22761e-09	6.12593e-09	8.15767e+06	35.2042
309	2329				-20.0243	2.0116e-09	5.5319e-09	8.15767e+06	35.2042
310	2330				-20.1263	1.81653e-09	4.99547e-09	8.15767e+06	35.2042
311	2331				-20.2283	1.64038e-09	4.51105e-09	8.15767e+06	35.2042
312	2332				-20.3303	1.48131e-09	4.07362e-09	8.15767e+06	35.2042
313	2333				-20.4323	1.33767e-09	3.6786e-09	8.15767e+06	35.2042
314	2334				-20.5343	1.20796e-09	3.32188e-09	8.15767e+06	35.2042
315	2335				-20.6363	1.09082e-09	2.99976e-09	8.15767e+06	35.2042
316	2336				-20.7383	9.85043e-10	2.70887e-09	8.15767e+06	35.2042
317	2337				-20.8403	8.89523e-10	2.44619e-09	8.15767e+06	35.2042
318	2338				-20.9423	8.03266e-10	2.20898e-09	8.15767e+06	35.2042
319	2339				-21.0443	7.25373e-10	1.99477e-09	8.15767e+06	35.2042
320	2340				-21.1463	6.55033e-10	1.80134e-09	8.15767e+06	35.2042
321	2341				-21.2483	5.91514e-10	1.62666e-09	8.15767e+06	35.2042
322	2342				-21.3503	5.34155e-10	1.46893e-09	8.15767e+06	35.2042
323	2343				-21.4523	4.82357e-10	1.32648e-09	8.15767e+06	35.2042
324	2344				-21.5543	4.35583e-10	1.19785e-09	8.15767e+06	35.2042
325	2345				-21.6563	3.93344e-10	1.0817e-09	8.15767e+06	35.2042
326	2346				-21.7583	3.55202e-10	9.76804e-10	8.15767e+06	35.2042
327	2347				-21.8603	3.20758e-10	8.82083e-10	8.15767e+06	35.2042
328	2348				-21.9623	2.89654e-10	7.96547e-10	8.15767e+06	35.2042
329	2349				-22.0643	2.61566e-10	7.19306e-10	8.15767e+06	35.2042
330	2350				-22.1663	2.36202e-10	6.49554e-10	8.15767e+06	35.2042
331	2351				-22.2683	2.13297e-10	5.86567e-10	8.15767e+06	35.2042
332	2352				-22.3703	1.92613e-10	5.29687e-10	8.15767e+06	35.2042
333	2353				-22.4723	1.73936e-10	4.78323e-10	8.15767e+06	35.2042
334	2354				-22.5743	1.57069e-10	4.3194e-10	8.15767e+06	35.2042
335	2355				-22.6763	1.41838e-10	3.90054e-10	8.15767e+06	35.2042
336	2356				-22.7783	1.28084e-10	3.52231e-10	8.15767e+06	35.2042
337	2357				-22.8803	1.15664e-10	3.18075e-10	8.15767e+06	35.2042
338	2358				-22.9823	1.04448e-10	2.87231e-10	8.15767e+06	35.2042
339	2359				-23.0843	9.43193e-11	2.59378e-10	8.15767e+06	35.2042
340	2360				-23.1863	8.51731e-11	2.34226e-10	8.15767e+06	35.2042
341	2361				-23.2883	7.69138e-11	2.11513e-10	8.15767e+06	35.2042
342	2362				-23.3903	6.94554e-11	1.91002e-10	8.15767e+06	35.2042
343	2363				-23.4923	6.27203e-11	1.72481e-10	8.15767e+06	35.2042
344	2364				-23.5943	5.66383e-11	1.55755e-10	8.15767e+06	35.2042
345	2365				-23.6963	5.11461e-11	1.40652e-10	8.15767e+06	35.2042
346	2366				-23.7983	4.61864e-11	1.27013e-10	8.15767e+06	35.2042
347	2367				-23.9003	4.17077e-11	1.14696e-10	8.15767e+06	35.2042
348	2368				-24.0023	3.76633e-11	1.03574e-10	8.15767e+06	35.2042
349	2369				-24.1043	3.4011e-11	9.35304e-11	8.15767e+06	35.2042
350	2370				-24.2063	3.0713e-11	8.44607e-11	8.15767e+06	35.2042
351	2371				-24.3083	2.77347e-11	7.62705e-11	8.15767e+06	35.2042
352	2372				-24.4103	2.50453e-11	6.88745e-11	8.15767e+06	35.2042
353	2373				-24.5123	2.26166e-11	6.21957e-11	8.15767e+06	35.2042
354	2374				-24.6143	2.04235e-11	5.61646e-11	8.15767e+06	35.2042
355	2375				-24.7163	1.8443e-11	5.07183e-11	8.15767e+06	35.2042
356	2376				-24.8183	1.66546e-11	4.58001e-11	8.15767e+06	35.2042
357	2377				-24.9203	1.50396e-11	4.13588e-11	8.15767e+06	35.2042
358	2378				-25.0223	1.35812e-11	3.73483e-11	8.15767e+06	35.2042
359	2379				-25.1243	1.22642e-11	3.37266e-11	8.15767e+06	35.2042
360	2380				-25.2263	1.10749e-11	3.04561e-11	8.15767e+06	35.2042
361	2381				-25.3283	1.0001e-11	2.75028e-11	8.15767e+06	35.2042
362	2382				-25.4303	9.0312e-12	2.48358e-11	8.15767e+06	35.2042
363	2383				-25.5323	8.15544e-12	2.24275e-11	8.15767e+06	35.2042
364	2384				-25.6343	7.3646e-12	2.02527e-11	8.15767e+06	35.2042
365	2385				-25.7363	6.65046e-12	1.82888e-11	8.15767e+06	35.2042
366	2386				-25.8383	6.00556e-12	1.65153e-11	8.15767e+06	35.2042
367	2387				-25.9403	5.4232e-12	1.49138e-11	8.15767e+06	35.2042
368	2388				-26.0423	4.89731e-12	1.34676e-11	8.15767e+06	35.2042
369	2389				-26.1443	4.42241e-12	1.21616e-11	8.15767e+06	35.2042
370	2390				-26.2463	3.99357e-12	1.09823e-11	8.15767e+06	35.2042
371	2391				-26.3483	3.60631e-12	9.91736e-12	8.15767e+06	35.2042
372	2392				-26.4503	3.25661e-12	8.95567e-12	8.15767e+06	35.2042
373	2393				-26.5523	2.94081e-12	8.08723e-12	8.15767e+06	35.2042
374	2394				-26.6543	2.65564e-12	7.30301e-12	8.15767e+06	35.2042
375	2395				-26.7563	2.39812e-12	6.59483e-12	8.15767e+06	35.2042
376	2396				-26.8583	2.16557e-12	5.95533e-12	8.15767e+06	35.2042
377	2397				-26.9603	1.95558e-12	5.37784e-12	8.15767e+06	35.2042
378	2398				-27.0623	1.76594e-12	4.85635e-12	8.15767e+06	35.2042
379	2399				-27.1643	1.5947e-12	4.38542e-12	8.15767e+06	35.2042
380	2400				-27.2663	1.44006e-12	3.96017e-12	8.15767e+06	35.2042
381	2401				-27.3683	1.30042e-12	3.57615e-12	8.15767e+06	35.2042
382	2402				-27.4703	1.17432e-12	3.22937e-12	8.15767e+06	35.2042
383	2403				-27.5723	1.06044e-12	2.91621e-12	8.15767e+06	35.2042
384	2404				-27.6743	9.5761e-13	2.63343e-12	8.15767e+06	35.2042
385	2405				-27.7763	8.6475e-13	2.37806e-12	8.15767e+06	35.2042
386	2406				-27.8783	7.80895e-13	2.14746e-12	8.15767e+06	35.2042
387	2407				-27.9803	7.05171e-13	1.93922e-12	8.15767e+06	35.2042
388	2408				-28.0823	6.3679e-13	1.75117e-12	8.15767e+06	35.2042
389	2409				-28.1843	5.75041e-13	1.58136e-12	8.15767e+06	35.2042
390	2410				-28.2863	5.19279e-13	1.42802e-12	8.15767e+06	35.2042
391	2411				-28.3883	4.68924e-13	1.28954e-12	8.15767e+06	35.2042
392	2412				-28.4903	4.23452e-13	1.16449e-12	8.15767e+06	35.2042
393	2413				-28.5923	3.8239e-13	1.05157e-12	8.15767e+06	35.2042
394	2414				-28.6943	3.45309e-13	9.49601e-13	8.15767e+06	35.2042
395	2415				-28.7963	3.11825e-13	8.57517e-13	8.15767e+06	35.2042
396	2416				-28.8983	2.81587e-13	7.74364e-13	8.15767e+06	35.2042
397	2417				-29.0003	2.54281e-13	6.99273e-13	8.15767e+06	35.2042
398	2418				-29.1023	2.29623e-13	6.31464e-13	8.15767e+06	35.2042
399	2419				-29.2043	2.07357e-13	5.70231e-13	8.15767e+06	35.2042
400	2420				-29.3063	1.87249e-13	5.14935e-13	8.15767e+06	35.2042
401	2421				-29.4083	1.69092e-13	4.65002e-13	8.15767e+06	35.2042
402	2422				-29.5103	1.52695e-13	4.1991e-13	8.15767e+06	35.2042
403	2423				-29.6123	1.37888e-13	3.79192e-13	8.15767e+06	35.2042
404	2424				-29.7143	1.24517e-13	3.42421e-13	8.15767e+06	35.2042
405	2425				-29.8163	1.12442e-13	3.09216e-13	8.15767e+06	35.2042
406	2426				-29.9183	1.01539e-13	2.79232e-13	8.15767e+06	35.2042
407	2427				-30.0203	9.16925e-14	2.52154e-13	8.15767e+06	35.2042
408	2428				-30.1223	8.2801e-14	2.27703e-13	8.15767e+06	35.2042
409	2429				-30.2243	7.47718e-14	2.05622e-13	8.15767e+06	35.2042
410	2430				-30.3263	6.75211e-14	1.85683e-13	8.15767e+06	35.2042
411	2431				-30.4283	6.09736e-14	1.67677e-13	8.15767e+06	35.2042
412	2432				-30.5303	5.50609e-14	1.51418e-13	8.15767e+06	35.2042
413	2433				-30.6323	4.97217e-14	1.36735e-13	8.15767e+06	35.2042
414	2434				-30.7343	4.49001e-14	1.23475e-13	8.15767e+06	35.2042
415	2435				-30.8363	4.05461e-14	1.11502e-13	8.15767e+06	35.2042
416	2436				-30.9383	3.66144e-14	1.0069e-13	8.15767e+06	35.2042
417	2437				-31.0403	3.30639e-14	9.09256e-14	8.15767e+06	35.2042
418	2438				-31.1423	2.98576e-14	8.21085e-14	8.15767e+06	35.2042
419	2439				-31.2443	2.69623e-14	7.41464e-14	8.15767e+06	35.2042
420	2440				-31.3463	2.43478e-14	6.69564e-14	8.15767e+06	35.2042
421	2441				-31.4483	2.19868e-14	6.04636e-14	8.15767e+06	35.2042
422	2442				-31.5503	1.98547e-14	5.46004e-14	8.15767e+06	35.2042
423	2443				-31.6523	1.79294e-14	4.93058e-14	8.15767e+06	35.2042
424	2444				-31.7543	1.61908e-14	4.45246e-14	8.15767e+06	35.2042
425	2445				-31.8563	1.46207e-14	4.0207e-14	8.15767e+06	35.2042
426	2446				-31.9583	1.3203e-14	3.63081e-14	8.15767e+06	35.2042
427	2447				-32.0603	1.19227e-14	3.27873e-14	8.15767e+06	35.2042
428	2448				-32.1623	1.07665e-14	2.96079e-14	8.15767e+06	35.2042
429	2449				-32.2643	9.72248e-15	2.67368e-14	8.15767e+06	35.2042
430	2450				-32.3663	8.77969e-15	2.41441e-14	8.15767e+06	35.2042
431	2451				-32.4683	7.92832e-15	2.18029e-14	8.15767e+06	35.2042
432	2452				-32.5703	7.1595e-15	1.96886e-14	8.15767e+06	35.2042
433	2453				-32.6723	6.46524e-15	1.77794e-14	8.15767e+06	35.2042
434	2454				-32.7743	5.83831e-15	1.60553e-14	8.15767e+06	35.2042
435	2455				-32.8763	5.27216e-15	1.44984e-14	8.15767e+06	35.2042
436	2456				-32.9783	4.76092e-15	1.30925e-14	8.15767e+06	35.2042
437	2457				-33.0803	4.29925e-15	1.18229e-14	8.15767e+06	35.2042
438	2458				-33.1823	3.88235e-15	1.06765e-14	8.15767e+06	35.2042
439	2459				-33.2843	3.50588e-15	9.64116e-15	8.15767e+06	35.2042
440	2460				-33.3863	3.16591e-15	8.70625e-15	8.15767e+06	35.2042
441	2461				-33.4883	2.85891e-15	7.862e-15	8.15767e+06	35.2042
442	2462				-33.5903	2.58168e-15	7.09962e-15	8.15767e+06	35.2042
443	2463				-33.6923	2.33133e-15	6.41117e-15	8.15767e+06	35.2042
444	2464				-33.7943	2.10526e-15	5.78947e-15	8.15767e+06	35.2042
445	2465				-33.8963	1.90112e-15	5.22807e-15	8.15767e+06	35.2042
446	2466				-33.9983	1.71676e-15	4.7211e-15	8.15767e+06	35.2042
447	2467				-34.1003	1.55029e-15	4.26329e-15	8.15767e+06	35.2042
448	2468				-34.2023	1.39996e-15	3.84988e-15	8.15767e+06	35.2042
449	2469				-34.3043	1.2642e-15	3.47655e-15	8.15767e+06	35.2042
450	2470				-34.4063	1.14161e-15	3.13943e-15	8.15767e+06	35.2042
451	2471				-34.5083	1.03091e-15	2.835e-15	8.15767e+06	35.2042
452	2472				-34.6103	9.30941e-16	2.56009e-15	8.15767e+06	35.2042
453	2473				-34.7123	8.40667e-16	2.31183e-15	8.15767e+06	35.2042
454	2474				-34.8143	7.59147e-16	2.08766e-15	8.15767e+06	35.2042
455	2475				-34.9163	6.85533e-16	1.88521e-15	8.15767e+06	35.2042
456	2476				-35.0183	6.19056e-16	1.7024e-15	8.15767e+06	35.2042
457	2477				-35.1203	5.59026e-16	1.53732e-15	8.15767e+06	35.2042
458	2478				-35.2223	5.04817e-16	1.38825e-15	8.15767e+06	35.2042
459	2479				-35.3243	4.55865e-16	1.25363e-15	8.15767e+06	35.2042
460	2480				-35.4263	4.11659e-16	1.13206e-15	8.15767e+06	35.2042
461	2481				-35.5283	3.7174e-16	1.02229e-15	8.15767e+06	35.2042
462	2482				-35.6303	3.35693e-16	9.23155e-16	8.15767e+06	35.2042
463	2483				-35.7323	3.0314e-16	8.33636e-16	8.15767e+06	35.2042
464	2484				-35.8343	2.73745e-16	7.52798e-16	8.15767e+06	35.2042
465	2485				-35.9363	2.472e-16	6.79799e-16	8.15767e+06	35.2042
466	2486				-36.0383	2.23229e-16	6.13878e-16	8.15767e+06	35.2042
467	2487				-36.1403	2.01582e-16	5.5435e-16	8.15767e+06	35.2042
468	2488				-36.2423	1.82034e-16	5.00595e-16	8.15767e+06	35.2042
469	2489				-36.3443	1.64382e-16	4.52052e-16	8.15767e+06	35.2042
470	2490				-36.4463	1.48442e-16	4.08216e-16	8.15767e+06	35.2042
471	2491				-36.5483	1.34048e-16	3.68631e-16	8.15767e+06	35.2042
472	2492				-36.6503	1.21049e-16	3.32885e-16	8.15767e+06	35.2042
473	2493				-36.7523	1.09311e-16	3.00605e-16	8.15767e+06	35.2042
474	2494				-36.8543	9.8711e-17	2.71455e-16	8.15767e+06	35.2042
475	2495				-36.9563	8.91389e-17	2.45132e-16	8.15767e+06	35.2042
476	2496				-37.0583	8.04951e-17	2.21361e-16	8.15767e+06	35.2042
477	2497				-37.1603	7.26894e-17	1.99896e-16	8.15767e+06	35.2042
478	2498				-37.2623	6.56407e-17	1.80512e-16	8.15767e+06	35.2042
479	2499				-37.3643	5.92755e-17	1.63008e-16	8.15767e+06	35.2042
480	2500				-37.4663	5.35275e-17	1.47201e-16	8.15767e+06	35.2042
481	2501				-37.5683	4.83369e-17	1.32927e-16	8.15767e+06	35.2042
482	2502				-37.6703	4.36497e-17	1.20037e-16	8.15767e+06	35.2042
483	2503				-37.7723	3.9417e-17	1.08397e-16	8.15767e+06	35.2042
484	2504				-37.8743	3.55947e-17	9.78853e-17	8.15767e+06	35.2042
485	2505				-37.9763	3.2143e-17	8.83934e-17	8.15767e+06	35.2042
486	2506				-38.0783	2.90261e-17	7.98218e-17	8.15767e+06	35.2042
487	2507				-38.1803	2.62114e-17	7.20815e-17	8.15767e+06	35.2042
488	2508				-38.2823	2.36697e-17	6.50917e-17	8.15767e+06	35.2042
489	2509				-38.3843	2.13744e-17	5.87797e-17	8.15767e+06	35.2042
490	2510				-38.4863	1.93018e-17	5.30798e-17	8.15767e+06	35.2042
491	2511				-38.5883	1.74301e-17	4.79326e-17	8.15767e+06	35.2042
492	2512				-38.6903	1.57399e-17	4.32846e-17	8.15767e+06	35.2042
493	2513				-38.7923	1.42136e-17	3.90873e-17	8.15767e+06	35.2042
494	2514				-38.8943	1.28353e-17	3.5297e-17	8.15767e+06	35.2042
495	2515				-38.9963	1.15906e-17	3.18742e-17	8.15767e+06	35.2042
496	2516				-39.0983	1.04667e-17	2.87833e-17	8.15767e+06	35.2042
497	2517				-39.2003	9.45171e-18	2.59922e-17	8.15767e+06	35.2042
498	2518				-39.3023	8.53518e-18	2.34717e-17	8.15767e+06	35.2042
499	2519				-39.4043	7.70752e-18	2.11957e-17	8.15767e+06	35.2042
500	2520				-39.5063	6.96011e-18	1.91403e-17	8.15767e+06	35.2042
501	2521				-39.6083	6.28519e-18	1.72843e-17	8.15767e+06	35.2042
502	2522				-39.7103	5.67571e-18	1.56082e-17	8.15767e+06	35.2042
503	2523				-39.8123	5.12534e-18	1.40947e-17	8.15767e+06	35.2042
504	2524				-39.9143	4.62833e-18	1.27279e-17	8.15767e+06	35.2042
505	2525				-40.0163	4.17952e-18	1.14937e-17	8.15767e+06	35.2042
506	2526				-40.1183	3.77423e-18	1.03791e-17	8.15767e+06	35.2042
507	2527				-40.2203	3.40824e-18	9.37266e-18	8.15767e+06	35.2042
508	2528				-40.3223	3.07774e-18	8.46379e-18	8.15767e+06	35.2042
509	2529				-40.4243	2.77929e-18	7.64305e-18	8.15767e+06	35.2042
510	2530				-40.5263	2.50978e-18	6.9019e-18	8.15767e+06	35.2042
511	2531				-40.6283	2.26641e-18	6.23262e-18	8.15767e+06	35.2042
512	2532				-40.7303	2.04663e-18	5.62824e-18	8.15767e+06	35.2042
513	2533				-40.8323	1.84817e-18	5.08247e-18	8.15767e+06	35.2042
514	2534				-40.9343	1.66895e-18	4.58962e-18	8.15767e+06	35.2042
515	2535				-41.0363	1.50711e-18	4.14456e-18	8.15767e+06	35.2042
516	2536				-41.1383	1.36097e-18	3.74266e-18	8.15767e+06	35.2042
517	2537				-41.2403	1.22899e-18	3.37973e-18	8.15767e+06	35.2042
518	2538				-41.3423	1.10982e-18	3.052e-18	8.15767e+06	35.2042
519	2539				-41.4443	1.0022e-18	2.75605e-18	8.15767e+06	35.2042
520	2540				-41.5463	9.05015e-19	2.48879e-18	8.15767e+06	35.2042
521	2541				-41.6483	8.17255e-19	2.24745e-18	8.15767e+06	35.2042
522	2542				-41.7503	7.38005e-19	2.02952e-18	8.15767e+06	35.2042
523	2543				-41.8523	6.66441e-19	1.83271e-18	8.15767e+06	35.2042
524	2544				-41.9543	6.01816e-19	1.65499e-18	8.15767e+06	35.2042
525	2545				-42.0563	5.43457e-19	1.49451e-18	8.15767e+06	35.2042
526	2546				-42.1583	4.90758e-19	1.34958e-18	8.15767e+06	35.2042
527	2547				-42.2603	4.43169e-19	1.21871e-18	8.15767e+06	35.2042
528	2548				-42.3623	4.00195e-19	1.10054e-18	8.15767e+06	35.2042
529	2549				-42.4643	3.61388e-19	9.93816e-19	8.15767e+06	35.2042
530	2550				-42.5663	3.26344e-19	8.97445e-19	8.15767e+06	35.2042
531	2551				-42.6683	2.94698e-19	8.1042e-19	8.15767e+06	35.2042
532	2552				-42.7703	2.66121e-19	7.31833e-19	8.15767e+06	35.2042
533	2553				-42.8723	2.40315e-19	6.60867e-19	8.15767e+06	35.2042
534	2554				-42.9743	2.17012e-19	5.96782e-19	8.15767e+06	35.2042
535	2555				-43.0763	1.95968e-19	5.38912e-19	8.15767e+06	35.2042
536	2556				-43.1783	1.76965e-19	4.86653e-19	8.15767e+06	35.2042
537	2557				-43.2803	1.59805e-19	4.39462e-19	8.15767e+06	35.2042
538	2558				-43.3823	1.44308e-19	3.96848e-19	8.15767e+06	35.2042
539	2559				-43.4843	1.30315e-19	3.58365e-19	8.15767e+06	35.2042
540	2560				-43.5863	1.17678e-19	3.23614e-19	8.15767e+06	35.2042
541	2561				-43.6883	1.06267e-19	2.92233e-19	8.15767e+06	35.2042
542	2562				-43.7903	9.59619e-20	2.63895e-19	8.15767e+06	35.2042
543	2563				-43.8923	8.66564e-20	2.38305e-19	8.15767e+06	35.2042
544	2564				-43.9943	7.82533e-20	2.15197e-19	8.15767e+06	35.2042
545	2565				-44.0963	7.06651e-20	1.94329e-19	8.15767e+06	35.2042
546	2566				-44.1983	6.38126e-20	1.75485e-19	8.15767e+06	35.2042
547	2567				-44.3003	5.76247e-20	1.58468e-19	8.15767e+06	35.2042
548	2568				-44.4023	5.20368e-20	1.43101e-19	8.15767e+06	35.2042
549	2569				-44.5043	4.69908e-20	1.29225e-19	8.15767e+06	35.2042
550	2570				-44.6063	4.24341e-20	1.16694e-19	8.15767e+06	35.2042
551	2571				-44.7083	3.83192e-20	1.05378e-19	8.15767e+06	35.2042
552	2572				-44.8103	3.46034e-20	9.51593e-20	8.15767e+06	35.2042
553	2573				-44.9123	3.12479e-20	8.59316e-20	8.15767e+06	35.2042
554	2574				-45.0143	2.82178e-20	7.75988e-20	8.15767e+06	35.2042
555	2575				-45.1163	2.54815e-20	7.0074e-20	8.15767e+06	35.2042
556	2576				-45.2183	2.30105e-20	6.32789e-20	8.15767e+06	35.2042
557	2577				-45.3203	2.07792e-20	5.71427e-20	8.15767e+06	35.2042
558	2578				-45.4223	1.87642e-20	5.16016e-20	8.15767e+06	35.2042
559	2579				-45.5243	1.69446e-20	4.65977e-20	8.15767e+06	35.2042
560	2580				-45.6263	1.53015e-20	4.20791e-20	8.15767e+06	35.2042
561	2581				-45.7283	1.38177e-20	3.79987e-20	8.15767e+06	35.2042
562	2582				-45.8303	1.24778e-20	3.4314e-20	8.15767e+06	35.2042
563	2583				-45.9323	1.12678e-20	3.09865e-20	8.15767e+06	35.2042
564	2584				-46.0343	1.01752e-20	2.79817e-20	8.15767e+06	35.2042
565	2585				-46.1363	9.18849e-21	2.52683e-20	8.15767e+06	35.2042
566	2586				-46.2383	8.29747e-21	2.28181e-20	8.15767e+06	35.2042
567	2587				-46.3403	7.49286e-21	2.06054e-20	8.15767e+06	35.2042
568	2588				-46.4423	6.76628e-21	1.86073e-20	8.15767e+06	35.2042
569	2589				-46.5443	6.11015e-21	1.68029e-20	8.15767e+06	35.2042
570	2590				-46.6463	5.51765e-21	1.51735e-20	8.15767e+06	35.2042
571	2591				-46.7483	4.9826e-21	1.37021e-20	8.15767e+06	35.2042
572	2592				-46.8503	4.49943e-21	1.23734e-20	8.15767e+06	35.2042
573	2593				-46.9523	4.06312e-21	1.11736e-20	8.15767e+06	35.2042
574	2594				-47.0543	3.66912e-21	1.00901e-20	8.15767e+06	35.2042
575	2595				-47.1563	3.31332e-21	9.11163e-21	8.15767e+06	35.2042
576	2596				-47.2583	2.99203e-21	8.22808e-21	8.15767e+06	35.2042
577	2597				-47.3603	2.70189e-21	7.4302e-21	8.15767e+06	35.2042
578	2598				-47.4623	2.43989e-21	6.70969e-21	8.15767e+06	35.2042
579	2599				-47.5643	2.20329e-21	6.05904e-21	8.15767e+06	35.2042
580	2600				-47.6663	1.98964e-21	5.4715e-21	8.15767e+06	35.2042
581	2601				-47.7683	1.7967e-21	4.94092e-21	8.15767e+06	35.2042
582	2602				-47.8703	1.62247e-21	4.4618e-21	8.15767e+06	35.2042
583	2603				-47.9723	1.46514e-21	4.02914e-21	8.15767e+06	35.2042
584	2604				-48.0743	1.32307e-21	3.63843e-21	8.15767e+06	35.2042
585	2605				-48.1763	1.19477e-21	3.28561e-21	8.15767e+06	35.2042
586	2606				-48.2783	1.07891e-21	2.967e-21	8.15767e+06	35.2042
587	2607				-48.3803	9.74288e-22	2.67929e-21	8.15767e+06	35.2042
588	2608				-48.4823	8.7981e-22	2.41948e-21	8.15767e+06	35.2042
589	2609				-48.5843	7.94495e-22	2.18486e-21	8.15767e+06	35.2042
590	2610				-48.6863	7.17452e-22	1.97299e-21	8.15767e+06	35.2042
591	2611				-48.7883	6.47881e-22	1.78167e-21	8.15767e+06	35.2042
592	2612				-48.8903	5.85055e-22	1.6089e-21	8.15767e+06	35.2042
593	2613				-48.9923	5.28322e-22	1.45289e-21	8.15767e+06	35.2042
594	2614				-49.0943	4.77091e-22	1.312e-21	8.15767e+06	35.2042
595	2615				-49.1963	4.30827e-22	1.18477e-21	8.15767e+06	35.2042
596	2616				-49.2983	3.89049e-22	1.06989e-21	8.15767e+06	35.2042
597	2617				-49.4003	3.51323e-22	9.66139e-22	8.15767e+06	35.2042
598	2618				-49.5023	3.17255e-22	8.72452e-22	8.15767e+06	35.2042
599	2619				-49.6043	2.86491e-22	7.8785e-22	8.15767e+06	35.2042
600	2620				-49.7063	2.5871e-22	7.11452e-22	8.15767e+06	35.2042
601	2621				-49.8083	2.33622e-22	6.42462e-22	8.15767e+06	35.2042
602	2622				-49.9103	2.10968e-22	5.80162e-22	8.15767e+06	35.2042
603	2623				-50.0123	1.9051e-22	5.23903e-22	8.15767e+06	35.2042
604	2624				-50.1143	1.72036e-22	4.731e-22	8.15767e+06	35.2042
605	2625				-50.2163	1.55354e-22	4.27224e-22	8.15767e+06	35.2042
606	2626				-50.3183	1.40289e-22	3.85795e-22	8.15767e+06	35.2042
607	2627				-50.4203	1.26685e-22	3.48385e-22	8.15767e+06	35.2042
608	2628				-50.5223	1.14401e-22	3.14602e-22	8.15767e+06	35.2042
609	2629				-50.6243	1.03307e-22	2.84095e-22	8.15767e+06	35.2042
610	2630				-50.7263	9.32894e-23	2.56546e-22	8.15767e+06	35.2042
611	2631				-50.8283	8.42431e-23	2.31668e-22	8.15767e+06	35.2042
612	2632				-50.9303	7.6074e-23	2.09203e-22	8.15767e+06	35.2042
613	2633				-51.0323	6.86971e-23	1.88917e-22	8.15767e+06	35.2042
614	2634				-51.1343	6.20355e-23	1.70598e-22	8.15767e+06	35.2042
615	2635				-51.2363	5.60199e-23	1.54055e-22	8.15767e+06	35.2042
616	2636				-51.3383	5.05876e-23	1.39116e-22	8.15767e+06	35.2042
617	2637				-51.4403	4.56821e-23	1.25626e-22	8.15767e+06	35.2042
618	2638				-51.5423	4.12523e-23	1.13444e-22	8.15767e+06	35.2042
619	2639				-51.6443	3.7252e-23	1.02443e-22	8.15767e+06	35.2042
620	2640				-51.7463	3.36397e-23	9.25091e-23	8.15767e+06	35.2042
621	2641				-51.8483	3.03776e-23	8.35385e-23	8.15767e+06	35.2042
622	2642				-51.9503	2.74319e-23	7.54377e-23	8.15767e+06	35.2042
623	2643				-52.0523	2.47718e-23	6.81225e-23	8.15767e+06	35.2042
624	2644				-52.1543	2.23697e-23	6.15166e-23	8.15767e+06	35.2042
625	2645				-52.2563	2.02005e-23	5.55513e-23	8.15767e+06	35.2042
626	2646				-52.3583	1.82416e-23	5.01645e-23	8.15767e+06	35.2042
627	2647				-52.4603	1.64727e-23	4.53e-23	8.15767e+06	35.2042
628	2648				-52.5623	1.48754e-23	4.09073e-23	8.15767e+06	35.2042
629	2649				-52.6643	1.34329e-23	3.69405e-23	8.15767e+06	35.2042
630	2650				-52.7663	1.21303e-23	3.33583e-23	8.15767e+06	35.2042
631	2651				-52.8683	1.0954e-23	3.01236e-23	8.15767e+06	35.2042
632	2652				-52.9703	9.8918e-24	2.72025e-23	8.15767e+06	35.2042
633	2653				-53.0723	8.93259e-24	2.45646e-23	8.15767e+06	35.2042
634	2654				-53.1743	8.06639e-24	2.21826e-23	8.15767e+06	35.2042
635	2655				-53.2763	7.28419e-24	2.00315e-23	8.15767e+06	35.2042
636	2656				-53.3783	6.57784e-24	1.80891e-23	8.15767e+06	35.2042
637	2657				-53.4803	5.93998e-24	1.6335e-23	8.15767e+06	35.2042
638	2658				-53.5823	5.36398e-24	1.47509e-23	8.15767e+06	35.2042
639	2659				-53.6843	4.84383e-24	1.33205e-23	8.15767e+06	35.2042
640	2660				-53.7863	4.37413e-24	1.20288e-23	8.15767e+06	35.2042
641	2661				-53.8883	3.94996e-24	1.08624e-23	8.15767e+06	35.2042
642	2662				-53.9903	3.56693e-24	9.80907e-24	8.15767e+06	35.2042
643	2663				-54.0923	3.22105e-24	8.85788e-24	8.15767e+06	35.2042
644	2664				-54.1943	2.9087e-24	7.99893e-24	8.15767e+06	35.2042
645	2665				-54.2963	2.62664e-24	7.22327e-24	8.15767e+06	35.2042
646	2666				-54.3983	2.37194e-24	6.52282e-24	8.15767e+06	35.2042
647	2667				-54.5003	2.14193e-24	5.8903e-24	8.15767e+06	35.2042
648	2668				-54.6023	1.93422e-24	5.31912e-24	8.15767e+06	35.2042
649	2669				-54.7043	1.74666e-24	4.80332e-24	8.15767e+06	35.2042
650	2670				-54.8063	1.57729e-24	4.33754e-24	8.15767e+06	35.2042
651	2671				-54.9083	1.42434e-24	3.91693e-24	8.15767e+06	35.2042
652	2672				-55.0103	1.28622e-24	3.5371e-24	8.15767e+06	35.2042
653	2673				-55.1123	1.16149e-24	3.19411e-24	8.15767e+06	35.2042
654	2674				-55.2143	1.04886e-24	2.88437e-24	8.15767e+06	35.2042
655	2675				-55.3163	9.47154e-25	2.60467e-24	8.15767e+06	35.2042
656	2676				-55.4183	8.55308e-25	2.3521e-24	8.15767e+06	35.2042
657	2677				-55.5203	7.72369e-25	2.12401e-24	8.15767e+06	35.2042
658	2678				-55.6223	6.97472e-25	1.91805e-24	8.15767e+06	35.2042
659	2679				-55.7243	6.29837e-25	1.73205e-24	8.15767e+06	35.2042
660	2680				-55.8263	5.68762e-25	1.5641e-24	8.15767e+06	35.2042
661	2681				-55.9283	5.13609e-25	1.41242e-24	8.15767e+06	35.2042
662	2682				-56.0303	4.63804e-25	1.27546e-24	8.15767e+06	35.2042
663	2683				-56.1323	4.18829e-25	1.15178e-24	8.15767e+06	35.2042
664	2684				-56.2343	3.78215e-25	1.04009e-24	8.15767e+06	35.2042
665	2685				-56.3363	3.41539e-25	9.39232e-25	8.15767e+06	35.2042
666	2686				-56.4383	3.0842e-25	8.48154e-25	8.15767e+06	35.2042
667	2687				-56.5403	2.78512e-25	7.65908e-25	8.15767e+06	35.2042
668	2688				-56.6423	2.51505e-25	6.91638e-25	8.15767e+06	35.2042
669	2689				-56.7443	2.27116e-25	6.2457e-25	8.15767e+06	35.2042
670	2690				-56.8463	2.05093e-25	5.64005e-25	8.15767e+06	35.2042
671	2691				-56.9483	1.85205e-25	5.09313e-25	8.15767e+06	35.2042
672	2692				-57.0503	1.67245e-25	4.59925e-25	8.15767e+06	35.2042
673	2693				-57.1523	1.51027e-25	4.15326e-25	8.15767e+06	35.2042
674	2694				-57.2543	1.36382e-25	3.75051e-25	8.15767e+06	35.2042
675	2695				-57.3563	1.23157e-25	3.38682e-25	8.15767e+06	35.2042
676	2696				-57.4583	1.11215e-25	3.0584e-25	8.15767e+06	35.2042
677	2697				-57.5603	1.0043e-25	2.76183e-25	8.15767e+06	35.2042
678	2698				-57.6623	9.06913e-26	2.49401e-25	8.15767e+06	35.2042
679	2699				-57.7643	8.1897e-26	2.25217e-25	8.15767e+06	35.2042
680	2700				-57.8663	7.39554e-26	2.03377e-25	8.15767e+06	35.2042
681	2701				-57.9683	6.67839e-26	1.83656e-25	8.15767e+06	35.2042
682	2702				-58.0703	6.03078e-26	1.65847e-25	8.15767e+06	35.2042
683	2703				-58.1723	5.44597e-26	1.49764e-25	8.15767e+06	35.2042
684	2704				-58.2743	4.91788e-26	1.35242e-25	8.15767e+06	35.2042
685	2705				-58.3763	4.44099e-26	1.22127e-25	8.15767e+06	35.2042
686	2706				-58.4783	4.01034e-26	1.10284e-25	8.15767e+06	35.2042
687	2707				-58.5803	3.62146e-26	9.95901e-26	8.15767e+06	35.2042
688	2708				-58.6823	3.27028e-26	8.99328e-26	8.15767e+06	35.2042
689	2709				-58.7843	2.95316e-26	8.1212e-26	8.15767e+06	35.2042
690	2710				-58.8863	2.66679e-26	7.33368e-26	8.15767e+06	35.2042
691	2711				-58.9883	2.40819e-26	6.62253e-26	8.15767e+06	35.2042
692	2712				-59.0903	2.17467e-26	5.98034e-26	8.15767e+06	35.2042
693	2713				-59.1923	1.96379e-26	5.40042e-26	8.15767e+06	35.2042
694	2714				-59.2943	1.77336e-26	4.87674e-26	8.15767e+06	35.2042
695	2715				-59.3963	1.6014e-26	4.40384e-26	8.15767e+06	35.2042
696	2716				-59.4983	1.44611e-26	3.9768e-26	8.15767e+06	35.2042
697	2717				-59.6003	1.30588e-26	3.59117e-26	8.15767e+06	35.2042
698	2718				-59.7023	1.17925e-26	3.24293e-26	8.15767e+06	35.2042
699	2719				-59.8043	1.0649e-26	2.92846e-26	8.15767e+06	35.2042
700	2720				-59.9063	9.61632e-27	2.64449e-26	8.15767e+06	35.2042

## Sheet: LandGem Methane Plots
Bahrain Paper Parameters L0=90.59, k=0.012
Switchgrass L0=140, k=0.012 (k from Bahrain paper (Low Rain))								Switchgrass L0=140, k=0.05 (Default, EPA CCA Conventional)								Switchgrass L0=140, k=0.102 (High Rain (Malasia))

[truncated: 2 more sheets: Plot Cumulative Pct Decomposed, Plot Methane Generation Rate]
